# Supplementary material
Source: publisher site journal article supplement (https://www.degruyterbrill.com/publication/isbn/9783110442656/downloadAsset/9783110442656_Buettner%20Koenigsherrschaft.zip)
Supplement: Supplementary file 1 [file mark_splm_9783110442649_Buttner Konigsherrschaft Kap. 1 Mittelalterliche Konigsherrschaft in der Forschung.pdf › mark_splm_9783110442649_Buttner Konigsherrschaft Kap. 1 Mittelalterliche Konigsherrschaft in der Forschung.pdf]

# **1 Mittelalterliche Königsherrschaft in der Forschung – Zusatzmaterial**

## **1.1 Die Königserhebung Felipes VI. von Spanien (2014)**

### **Fragen und Anregungen**

- Führen Sie eine Internetrecherche über die Berichterstattung zur Königserhebung Felipes VI. durch.
- Ordnen Sie die Berichte nach Gattungen und charakterisieren sie die verschiedenen Darstellungen. Arbeiten Sie Schwerpunkte, Deutungen und Wertungen heraus. Erläutern Sie, welche Rolle Bildern in den verschiedenen Berichten zukommt.
- Überlegen Sie, welche Arten der Berichterstattung mit welchen mittelalterlichen Quellen in Analogie gesetzt werden können. Erörtern Sie Gemeinsamkeiten und Differenzen der Überlieferungslage. Diskutieren Sie, welche Schwierigkeiten jeweils bei der Interpretation bestehen.

## 1.2 Die Herrschererhebung Heinrichs I. (918/19)

### Fragen und Anregungen

- Verschaffen Sie sich mit Hilfe der Lektüreempfehlung und weiterer Recherche einen Überblick über aktuelle Darstellungen der Herrschererhebung Heinrichs I. in Handbüchern.
- Erläutern Sie die Argumentation der Autoren und die Grundlagen ihrer Interpretationen.
- Ordnen Sie die Arten der Darstellung zwischen den beiden Polen „eher erregend-neu“ oder „eher beruhigend-traditionell“ (Moraw 2005b, S. 120) ein.
- Recherchieren Sie die Biographie der Wissenschaftler und setzen Sie diese mit den vertretenen Deutungen in Beziehung.
- Diskutieren Sie die Interpretationen und erarbeiten Sie sich einen eigenen Standpunkt.

### Lektüreempfehlungen

Althoff, Gerd, Die Ottonen. Königsherrschaft ohne Staat (Urban-Taschenbücher 473), 2. Aufl. Stuttgart/Berlin/Köln 2005, S. 35–45.

Boshof, Egon, Königtum und Königsherrschaft im 10. und 11. Jahrhundert (Enzyklopädie deutscher Geschichte 27), 3. Aufl. München 2010, S. 4f. und 61f.

Fried, Johannes, Der Weg in die Geschichte. Die Ursprünge Deutschlands bis 1024 (Propyläen Geschichte Deutschlands), Frankfurt am Main/Berlin 1994, S. 460–462.

Keller, Hagen/Althoff, Gerd, Die Zeit der späten Karolinger und der Ottonen. Krisen und Konsolidierungen 888–1024 (Gebhardt. Handbuch der deutschen Geschichte 3), Stuttgart 2008, S. 115–119.

Reindel, Kurt, Königtum und Kaisertum der Liudolfinger und frühen Salier in Deutschland und Italien (919–1056), in: Handbuch der europäischen Geschichte. Bd. 1: Europa im Wandel von der Antike zum Mittelalter, hg. von Theodor Schieder, Stuttgart 1976, S. 665–730, hier S. 669f.

Rogge, Jörg, Die deutschen Könige im Mittelalter. Wahl und Krönung (Geschichte kompakt), 2. Aufl. Darmstadt 2011, S. 4–6.

Schneidmüller, Bernd, Heinrich I. (919–936), in: Die deutschen Herrscher des Mittelalters. Historische Portraits von Heinrich I. bis Maximilian I. (919–1519), hg. von Bernd Schneidmüller/Stefan Weinfurter, München 2003, S. 15–34, hier S. 20–24.

### 1.3 Politische Landkarten – Europa um ...

#### Fragen und Anregungen

- Recherchieren Sie in gedruckten Werken und im Internet nach weiteren Karten, die die politische Situation in Europa zu einem bestimmten Zeitpunkt zeigen.
- Erläutern Sie die Veränderungen, die sich seit 800 ereignet hatten und bis 1400 noch ereignen würden.
- Diskutieren Sie die Vor- und Nachteile der kartographischen Darstellung politischer Ordnung.
- Erörtern Sie die Vor- und Nachteile der verschiedenen Recherchemöglichkeiten und ihrer Ergebnisse.

#### Lektüreempfehlungen

dtv-Atlas Weltgeschichte. Bd. 1: Von den Anfängen bis zur Französischen Revolution, hg. von Hermann Kinder/Werner Hilgemann (dtv 3001), 38. Aufl. München 2005.

Großer Historischer Weltatlas. Teil 2: Mittelalter, hg. vom Bayerischen Schulbuchverlag, 2. Aufl. München 1979; Erläuterungen, hg. von Ernst Walter Zeeden, München 1983.

Putzger. Historischer Weltatlas, hg. von Ernst Bruckmüller/Peter Claus Hartmann, 104. Aufl. Berlin 2011.
