# Supplementary material
Source: publisher site journal article supplement (https://www.degruyterbrill.com/publication/isbn/9783110442656/downloadAsset/9783110442656_Buettner%20Koenigsherrschaft.zip)
Supplement: Supplementary file 2 [file mark_splm_9783110442649_Buttner Konigsherrschaft Kap. 10 Im Dienst des Konigs.pdf › mark_splm_9783110442649_Buttner Konigsherrschaft Kap. 10 Im Dienst des Konigs.pdf]

## 10 Im Dienst des Königs – Zusatzmaterial

### 10.1 Hofdefinitionen in der Forschung

Rösener 1991, Sp. 66:

„Der H[of] im Sinne von K[öni]gs- oder F[ür]s[t]enhof ist im Mittelalter ein komplexes Herrschafts- und Sozialgebilde. Neben den kulturellen Aspekten [...] sind bes[onders] die sozialen, polit[ischen] und administrativen Elemente des H[of]es zu beachten.“

Hirschbiegel 1997, S. 118:

„In Zusammenführung dieser systemtheoretischen Überlegungen mit dem ‚historischen Hofstrukturmodell‘ kann ‚Hof‘ schließlich definiert werden als ein soziales System, dessen Aufgabe es ist, als Institution dauerhaft Orientierungs- und Verhaltenssicherheit auch gegenüber Dritten zu bieten, um der kontingenten Komplexität der Umwelt begegnen zu können. Diese Aufgabe wird gelöst durch die spezifische organisatorische Ausformung des Systems und durch die segmentäre, stratifikatorische und/oder funktionale Ausdifferenzierung von Strukturen und Strukturelementen zum Zweck der Reduktion und Selektion von Umweltkomplexität mit dem Ziel der kongruenten Generalisierung von Verhaltenserwartungen.“

Paravicini 2007, S. 241:

„Da ist zuerst der Hof. Erneut wurde seine amorphe Struktur betont, seine Wandelbarkeit unterstrichen, seine Unfaßlichkeit bedauert, die doch die eigentliche Herausforderung darstellt. In aller Wandlung gibt aber es einen fester Kern: Der Hof bildet jene Personengruppe, die, sei es als Diener im Haushalt, sei es als Familiaren der Herrschaft sich um den Herren schart. Hier zieht sie an die Aussicht auf Salär und Stellung, dort auf Teilhabe an der Macht und Hoffnung auf Verdienstchancen in welcher Form auch immer. Die Übergänge zwischen engerem und weiterem Hof sind fließend, Wechsel ist möglich; die Tendenz geht dahin, daß der engere Haushalt den gesamten weiteren Hof umfaßt.“

Kölzer 2006, S. 42:

„Insgesamt ist der Sozialkörper ‚Hof‘ in der zweiten Hälfte des 12. Jh. ein amöbenhaftes Gebilde, das als politisches Leitungsorgan mit mehr oder weniger zufällig sich ergebenden Besetzungen arbeitete, ohne grundsätzlich an Forderungen wie Mindestrepräsentanz oder Quorum gebunden zu sein. Es gab weder ein Beratungsmonopol der Fürsten noch einen festen Handlungsbedarf-Kanon. Möglichst viele einzubinden und Entscheidungen mittragen zu lassen, war im Hinblick auf das Funktionieren des ‚Personenverbandstaates‘ gleichwohl nicht

nur ein Gebot politischer Klugheit, sondern ein unabdingbares Erfordernis. Der König mußte für sich und seine Sache immer wieder werben, denn ein wirklich wirksames Instrumentarium zur Disziplinierung jener, die andere Prioritäten setzten, gab es nicht, und ihre Zahl nahm gegen Ende des 12. Jh. deutlich zu.“

Laudage 2011, S. 78 f.:

„Man hat sich nämlich gleich mehrmals die Mühe gemacht, die Struktur von Barbarossas Hof im Lichte der Zeugenlisten seiner Urkunden zu erforschen, und hieraus die Schlussfolgerung gezogen, daß er zumindest personell ‚ein amöbenhaftes Gebilde‘ (Theo Kölzer) gewesen sei. Aber ist der Begriff damit bereits hinreichend definiert? Kann man wirklich mit dem Oxforder Historiker Karl Leyser sagen: ‚Friedrichs Hof war eigentlich seine jeweilige menschliche Umgebung‘? Es scheint nicht so zu sein, denn ein anderer Autor formuliert unwidersprochen: ‚*Curia* heißt das neue Zentrum der Herrschaftsausübung. Sie ist ein schillerndes Gebilde: Sozialkörper, Verfassungselement, Trägerin politischer Entscheidungen und Instrument der Verwaltung und Justiz‘ (Hermann Jakobs).“

König 2011, S. 24:

„Etwas konkreter als ein ‚komplexes Herrschafts- und Sozialgefüge‘ lassen sich Höfe also als eher personenverbandlich, denn als geographisch bestimmte politische Zentren definieren, die durch einen variablen Institutionalisierungsgrad gekennzeichnet sind. Sie sind dabei eingebunden in ein multipolares Geflecht verschiedener politischer Einflussphären, die ineinander greifen und in hierarchischer Beziehung zueinander stehen.“

Eichler 2011, S. 137:

„Hof – so dürfen wir also zusammenfassend festhalten – meint in der Karolingerzeit schon dem Sprachgebrauch der Zeitgenossen nach keineswegs nur die unmittelbare und permanente Umgebung des Königs, die quellenmäßig schwer fassbare Gruppe derjenigen, denen die Erledigung der täglich anfallenden Arbeiten und Aufgaben anvertraut war, die königliche Familie und die Inhaber der Hofämter. Hof besitzt nicht zuletzt eine politische Dimension und bezeichnet als solches einen um den König zentrierten Raum für politische Entscheidungsfindung, dessen Ausmaße variabel und kaum näher abzustecken sind.“

## Fragen und Anregungen

- Benennen Sie die zentralen Definitionsmerkmale des mittelalterlichen (Königs-)Hofs.

- Stellen Sie die verschiedenen Definitionen und Beschreibungen einander gegenüber und diskutieren Sie deren Reichweite und Erklärungskraft.

### Lektüreempfehlungen

- Eichler, Daniel, Karolingische Höfe und Versammlungen – Grundvoraussetzungen, in: Streit am Hof im frühen Mittelalter, hg. von Matthias Becher/Alheydis Plassmann (Super alta perennis. Studien zur Wirkung der Klassischen Antike 11), Göttingen 2011, S. 121–148.
- Rösener, Werner, Art. „Hof“, in: Lexikon des Mittelalters 5, München/Zürich 1991, Sp. 66 f.
- Hirschbiegel, Jan, Der Hof als soziales System, in: Mitteilungen der Residenzen-Kommission der Akademie der Wissenschaften zu Göttingen 3,1, 1993, S. 11–25. [[Link](#)]
- Kölzer, Theo, Der Hof Kaiser Barbarossas und die Reichsfürsten, in: Deutscher Königshof, Hoftag und Reichstag im späteren Mittelalter, hg. von Peter Moraw (Vorträge und Forschungen 48), Stuttgart 2002, S. 1–47. [[Link](#)]
- König, Daniel, Öffentliche religiöse Auseinandersetzungen unter Beteiligung spätantik-frühmittelalterlicher Höfe – Versuch einer Typologie, in: Streit am Hof im frühen Mittelalter, hg. von Matthias Becher/Alheydis Plassmann (Super alta perennis. Studien zur Wirkung der Klassischen Antike 11), Göttingen 2011, S. 17–44.
- Laudage, Johannes, Der Hof Friedrich Barbarossas: Eine Skizze, in: Rittertum und höfische Kultur der Stauferzeit hg. von Johannes Laudage/Yvonne Leiverkus (Europäische Geschichtsdarstellungen 12), Köln/Weimar/Wien 2006, S. 75–92.
- Paravicini, Werner, Macht bei Hofe, Macht über den Hof, Macht durch den Hof. Eine kurze Zusammenfassung, in: Hof und Macht. Dresdener Gespräche zur Theorie des Hofes, hg. von Reinhardt Butz/Jan Hirschbiegel (Vita curialis 1), Münster 2007, S. 241–248.

## 10.2 Die Organisation des englischen Königshofs im 12. und 13. Jahrhundert

*Constitutio domus regis* (1135–1139):

Dialogus de Scaccario. The Course of the Exchequer by Richard, Fitz Nigel. And Constitutio Domus Regis. The Establishment of the Royal Household, hg. von Charles Johnson, Oxford 1983, S. 128–135 [*Original mit englischer Übersetzung*]. [[Link](#)]

Dialogus de Scaccario. The Dialogue of the Exchequer; Constitutio Domus Regis. The Disposition of the King's Household, hg. von Emilie Amt/S. D. Church (Oxford Medieval Texts), Oxford 2007, S. 195–215 [*Original mit englischer Übersetzung*].

English Historical Documents. Bd. 2: 1042–1189, hg. von Dorothy Whitelock, 2. Aufl. London 1981, Nr. 30, S. 454–460 [*englische Übersetzung*].

Household Ordinance (1279):

Tout, Thomas F., Chapters in the administrative history of mediaeval (Publications of the University of Manchester 126, 127, 183, 184, 207, 224), 6 Bde., Manchester 1920-1933, ND Manchester 1967, Bd. 2, S. 158–163 [*Original*].

English Historical Documents. Bd. 3: 1189–1327, hg. von Harry Rothwell, 2. Aufl. London 1996, Nr. 118, S. 581–586 [*englische Übersetzung*].

### Fragen und Anregungen

- Charakterisieren Sie Aufbau und Inhalt der beiden Quellen und überlegen Sie, welchen Entstehungs- und Verwendungskontext sie hatten.
- Schildern Sie den Aufbau des englischen Königshofs und erläutern Sie den vom 12. zum 13. Jahrhundert eingetretenen Wandel.
- Vergleichen Sie die Hoforganisation mit der anderer Herrscher.
