# Supplementary material
Source: publisher site journal article supplement (https://www.degruyterbrill.com/publication/isbn/9783110442656/downloadAsset/9783110442656_Buettner%20Koenigsherrschaft.zip)
Supplement: Supplementary file 3 [file mark_splm_9783110442649_Buttner Konigsherrschaft Kap. 11 Herrschaft an Stelle des Konigs.pdf › mark_splm_9783110442649_Buttner Konigsherrschaft Kap. 11 Herrschaft an Stelle des Konigs.pdf]

## 11 Herrschaft an Stelle des Königs – Zusatzmaterial

### 11.1 Der Kampf um Regentschaft nach dem Tod Ottos II. (983)

- Vgl. Zusatzmaterial zu Kapitel 6.

### 11.2 Kaiserin Agnes von Poitou im Urteil der Quellen und Forschung

Adam von Bremen, Hamburgische Kirchengeschichte (entstanden 1075/1076), zum Tod Kaiser Heinrichs III. und Papst Leo IX.:<sup>1</sup>

Durch ihren Tod wurde nicht nur die Kirche in Unordnung gebracht, sondern auch das Reich schien zu seinem Ende gekommen zu sein. [...] In der Herrschaft des Reichs folgte zum großen Schaden für das Kaiserreich eine Frau mit einem Kind. Die Fürsten waren nämlich unwillig, durch weibliche Macht beschränkt oder durch kindliche Gewalt regiert zu werden, und um nicht dienen zu müssen, sicherten sie sich zunächst gemeinsam ihre alten Freiheiten. Dann aber begannen sie untereinander zu streiten, wer von ihnen der größte sei. Schließlich griffen sie frech zu den Waffen, um ihren Herrn und König abzusetzen. Und alle diese Dinge können leichter mit den Augen gesehen als mit der Feder geschildert werden.

Hampe 1909, S. 30 f.

„Nach dem bald erfolgenden Tode des päpstlichen Beraters Viktor II. (1057) sah sich Agnes, die Witwe Heinrichs III., als Regentin vor eine ihre Kraft weit übersteigende Aufgabe gestellt. Ängstlich und unsicher, ohne politisches Urteil, persönlichen Antrieben folgend, voll kirchlicher Ergebenheit, ein schwaches Weib, hat sie durch ihr energieloses Walten künftiges Unheil vorbereiten helfen. Die Männer, die sie in Süddeutschland zu Herzogen erhob [...], sollten sich bald genug als die gefährlichsten Gegner der Krone erweisen. Die Günstlingswirtschaft am Hofe, die Fürsorge für die Reichsklöster, die Mißerfolge der großen Politik steigerten die Unzufriedenheit der geistlichen und weltlichen Großen und führten zu dem Staatsstreich von Kaiserswerth (1062), der mit der Person des königli-

---

<sup>1</sup> Adam von Bremen, Hamburgische Kirchengeschichte, hg. von Bernhard Schmeidler (MGH SS rer. Germ. [2]), 3. Aufl. Hannover/Leipzig 1917, I. III, c. 34, S. 176: *Quorum morte non solum ecclesia turbata est, verum etiam res publica finem habere videbatur. [...] Ad gubernacula regni mulier cum puero successit, magno imperii detrimento. Indignantes enim principes aut muliebri potestate constringi aut infantili ditione regi primo quidem communiter vindicarunt se in pristinam libertatem, ut non servirent; dein contentionem moverunt inter se, quis eorum videretur esse maior; postremo armis audacter sumptis dominum et regem suum deponere moliti sunt. Et haec omnia oculis potius videri possunt, quam calamo scribi.* [\[Link\]](#)

chen Knaben zugleich das Reichsregiment in die Hand der Fürsten gab und die Kaiserin veranlaßte, sich in das langersehnte Kloster zurückzuziehen.“

Bulst-Thiele 1933, S. 83:

„Sie hat getan, was sie konnte, indem sie versuchte, das Reich ihrem Sohn so zu übergeben, wie sie es von ihrem Gemahl empfangen hatte; aber das Fehlen einer starken Hand schadete dem Reich innen und außen. An Rom scheiterte sie. Unter Heinrich III. hatte das Verhängnis, das dem Kaisertum drohte, begonnen: das Papsttum war zu einer rivalen Macht geworden; die große Wandlung zum Religiösen begann mehr und mehr auch Deutschland zu erfassen. Die alten Formen des ottonischen Kaisertums hatten sich überlebt. Der Schöpfer aber eines neuen war noch nicht geboren.“

Struve 1985, S. 28 f.:

„Es kann hiernach nicht mehr die Rede davon sein, daß Agnes nach dem Schock, den der Raub ihres Sohnes zweifellos für sie bedeutete, Deutschland gleichsam fluchtartig verlassen hat, um sich fortan unter Verzicht auf jede eigene Willensregung im Dienst für das Reformpapsttum zu verzehren. Die Kaiserin hat vielmehr ihren seit längerem gehegten Wunsch, der Welt zu entsagen und ein klösterliches Leben zu beginnen, den Forderungen der Staatsraison untergeordnet, indem sie auf Anraten ihrer Vertrauten bis zur Schwertleite Heinrichs IV. in Deutschland ausharrte. Durch ihre Präsenz in Deutschland hat sie, selbst wenn sie sich dabei zeitweilig vom Hofe entfernt aufhielt, dafür gesorgt, daß die Herrschaft im Reich ihrem minderjährigen Sohne – und damit dem salischen Hause – erhalten blieb. Erst als mit der Mündigkeitserklärung Ostern 1065 die Regierungsgewalt offiziell auf Heinrich IV. übergegangen war, konnte Agnes an die Verwirklichung ihres religiösen Anliegens denken. Auch hierbei ging sie, wie sich gezeigt hat, keineswegs überstürzt, sondern durchaus planvoll zu Werke, indem sie für ihren Aufenthalt in Italien in materieller wie in personeller Hinsicht Vorsorge traf. [...]

Die im Zusammenhang mit der Datierung ihrer Romreise gewonnenen Erkenntnisse dürften somit auch zum Abbau der auch heute noch anzutreffenden Klischeevorstellung von der willensschwachen, entschlußlosen Regentin beitragen.“

Black-Veldtrup 1995, S. 381, 382 und 384:

„Man muß also eine neue Beurteilung der Quellen wagen. Agnes' häufige Intervention in den Diplomen Heinrichs III. bezeugt zum einen ihre beinahe ständige Anwesenheit am Hof. Zum anderen kann man mit Sicherheit annehmen, daß ihre Vermittlung darüber hinaus aber auch Beteiligung an den jeweiligen Rechtshandlungen und deren Vorbereitung bedeutet. [...] Die überlieferten Zeugnisse aus den Jahren 1043 bis 1056 [...] bieten somit keine Anhaltspunkte für die Annahme, daß sie in dieser Zeit eigenständig agiert hätte – aus ihnen ergibt sich vielmehr das Bild eines starken, gemeinsam handelnden Herrscherpaares.

Deutlicher tritt uns die Person der Kaiserin erst während ihrer Regentschaft entgegen. Zweifellos hat sie auf vielen Gebieten die Politik Heinrichs III. fortgeführt, wie z. B. bei der Einsetzung von Bischöfen und beim Ausbau Goslars deutlich wird; andererseits traf sie Entscheidungen, die den politischen Grundsätzen ihres Mannes diametral entgegengesetzt waren. [...]

Insgesamt sind Agnes' Entscheidungen darauf bedacht, Konflikte zu vermeiden. Dies ist jedoch durchaus nicht im Sinne einer Scheu vor politischer Auseinandersetzung zu verstehen, wie ihre Haltung im Bamberger Bischofsstreit deutlich zeigt, sondern im Hinblick auf ihr Ziel zu interpretieren, ihrem Sohn die Herrschaft zu sichern und insgesamt die Kontinuität salischer Politik zu wahren. [...]

Agnes war weder schwach noch hilflos noch unsicher – im Gegenteil: Sie muß, wenn man diese Bewertung wagen will, eine durchaus mit politischem Geschick begabte, willensstarke und tatkräftige Frau gewesen sein, die die geistigen Strömungen ihrer Zeit in vielfältiger Weise beeinflusste und die mit bemerkenswerter Konsequenz einen Weg ging, dessen Geradlinigkeit offenbar bis heute nicht richtig erkannt wurde.“

Fößel 2002, S. 334 f. und 338:

„In den ersten Jahren ihrer Regentschaft konnte Agnes unangefochten die Macht im Reich ausüben. Im Gegensatz zur Regierung Heinrichs III. gab es keine herrschaftsgefährdenden Rebellionen oder Unruhen. [...] Die anfängliche positive Bewertung der Regierungsführung der Kaiserin änderte sich erst zu Beginn des Jahres 1062, als zunehmende Kritik zum spektakulären Attentat von Kaiserswerth Anfang April 1062 führte, in dessen Verlauf der elfjährige Heinrich IV. sowie ein Teil der Reichsinsignien in die Hände einer Fürstenopposition unter Führung Annos von Köln fielen. In der Folgezeit übernahm der Erzbischof die Erziehung des Königs und die Leitung der Reichsgeschäfte [...]

Im Schisma wird die eigentliche Trendwende gesehen, die aufgrund persönlicher Schuldzuschreibung und Gewissensnöte eine Vernachlässigung der Reichsgeschäfte, die Schleiernahme und schließlich das ‚Attentat‘ der Fürstenopposition nach sich zog, wobei sich Agnes aber nicht völlig aus dem öffentlichen Leben flüchtete, sondern bis zur selbständigen Herrschaftsübernahme Heinrichs IV. präsent blieb und erst 1065 die Reise nach Rom antrat. In Italien führte sie ein frommes Leben. Sie zog sich aber nicht etwa in die Einsamkeit und Weltabgeschiedenheit eines Klosters zurück, sondern war weiterhin politisch aktiv und griff nach wie vor in die Politik ein. Dies demonstriert in eindrucksvoller Weise die Autorität der Kaiserin die – so das in der neueren Forschung gezeichnete Bild – niemals eine der in ihrem Leben nicht gerade seltenen schwierigen Situationen benutzte, um sich der Verantwortung für Königtum, Reich und Kirche zu entziehen.“

## Fragen und Anregungen

- Geben Sie die Bewertungen von Agnes' Herrschaft (1043–1077) wieder und analysieren Sie die vorgebrachten Argumente. Bewerten Sie, welche Rolle hierbei der Regentschaft zukommt.
- Diskutieren Sie, inwiefern und in welchem Maß sich eine Regentschaft in Anforderung und Schwierigkeiten von einer ‚regulären‘ Königsherrschaft unterschied.
- Verorten Sie die unterschiedlichen Bewertungen im allgemeinen Wandel der geschichtswissenschaftlichen Beschäftigung mit der Rolle der Königin (vgl. Kapitel 1).

## Lektüreempfehlungen

Althoff, Gerd, Heinrich IV. (Gestalten des Mittelalters und der Renaissance), 3. Aufl. Darmstadt 2013, S. 41–66.

Black-Veldtrup, Mechthild, Kaiserin Agnes (1043–1077). Quellenkritische Studien (Münstersche historische Forschungen 7), Köln/Weimar/Wien 1995.

Bulst-Thiele, Marie Luise, Kaiserin Agnes (Beiträge zur Kulturgeschichte des Mittelalters und der Renaissance 52), Berlin 1933, ND Hildesheim 1972.

Fößel, Amalie, Die Königin im mittelalterlichen Reich. Herrschaftsausübung, Herrschaftsrechte, Handlungsspielräume (Mittelalter-Forschungen 4), Stuttgart 2000, S. 332–338.

Karl Ludwig Hampe, Deutsche Kaisergeschichte in der Zeit der Salier und Staufer, Heidelberg 1909.

Offergeld, Thilo, Reges pueri. Das Königtum Minderjähriger im frühen Mittelalter (Monumenta Germaniae Historica Schriften 50), Hannover 2001, S. 786–797.

Struve, Tilman, Die Romreise der Kaiserin Agnes, in: Historisches Jahrbuch 105, 1985, S. 1–29.

### 11.3 Die Einsetzung des Mainzer Erzbischofs Konrad III. zum Reichsvikar in Deutschland (1422)

In der Urkunde der Ernennung des Mainzer Erzbischofs Konrad III. zum Statthalter in Deutschland durch König Sigismund wird einleitend eine ausführliche Begründung gegeben (RTA 8, Nr. 164, § 1–3, S. 187 f.). [\[Link\]](#)

#### Fragen und Anregungen

- Geben Sie die Begründung wieder und schildern Sie deren Aufbau. Erläutern sie die formalen und inhaltlichen Unterschiede zwischen den verschiedenen Dokumenten (vgl. RTA 8, Nr. 165, S. 193 [\[Link\]](#); Nr. 168, S. 197 f. [\[Link\]](#)).
- Kontextualisieren und Bewerten sie die Statthaltereinsetzung unter Zuhilfenahme der Forschungsliteratur.
- Vergleichen Sie die offiziellen Bestimmungen der Urkunde mit der Inhaltszusammenfassung durch einen unbekannten Zeitgenossen (RTA 8, Nr. 166, S. 194–196 [\[Link\]](#)): Wie eng ist die Übereinstimmung mit der eigentlichen Herrscherurkunde? Wie gut war der Inhalt des Dokuments bekannt? Finden sich Hinweise auf eine abweichende Schwerpunktsetzung?

#### Lektüreempfehlungen

Hoensch, Jörg K., Kaiser Sigismund. Herrscher an der Schwelle zur Neuzeit. 1368–1437, München 1996, S. 307 f.

Heckmann, Marie-Luise, Stellvertreter, Mit- und Ersatzherrscher. Regenten, Generalstatthalter, Kurfürsten und Reichsvikare in Regnum und Imperium vom 13. bis zum frühen 15. Jahrhundert (Studien zu den Luxemburgern und ihrer Zeit 9), 2 Bde., Warendorf 2002, Bd. 2, S. 643–645.
