# Supplementary material
Source: publisher site journal article supplement (https://www.degruyterbrill.com/publication/isbn/9783110442656/downloadAsset/9783110442656_Buettner%20Koenigsherrschaft.zip)
Supplement: Supplementary file 4 [file mark_splm_9783110442649_Buttner Konigsherrschaft Kap. 12 Das Ende - Tod und Memoria.pdf › mark_splm_9783110442649_Buttner Konigsherrschaft Kap. 12 Das Ende - Tod und Memoria.pdf]

## 12 Das Ende: Tod und Memoria – Zusatzmaterial

### 12.1 Tod und Memoria Rudolfs von Rheinfelden (gest. 1080)

#### 12.1.1 Der Schlachtentod im Widerstreit der Überlieferung

Vita Heinrici IV imperatoris:<sup>1</sup>

Hierauf fiel der König [Heinrich IV.] oft mit dem Heer in Sachsen ein und zog sich wieder zurück, entweder als Sieger oder nach unentschiedenem Kampf. Bei seiner letzten Rückkehr aber errang er einen sowohl bemerkenswerten als auch glücklichen Sieg, und der Welt wurde ein großes Beispiel gegeben, dass niemand sich gegen seinen Herrn erheben darf. Denn Rudolf, der sich nicht gescheut hatte den seinem Herrn König geschworenen Treueid zu brechen, veranschaulichte durch seine abgeschlagene rechte Hand die überaus gerechte Strafe für den Meineid. Und wie wenn seine übrigen Wunden für den Tod nicht genug gewesen wären, traf ihn auch an diesem Körperteil die Strafe, damit durch die Strafe auch die Schuld erkannt werde.

Brunos Buch vom Sachsenkrieg:<sup>2</sup>

Als die [siegreichen] Sachsen inzwischen in ihr Lager zurückgekehrt waren, fanden sie einen großen Teil ihrer Freude stark gemindert, da ihr König Rudolf zwei Wunden erhalten hatte, die eine tödlich, die andere entstellend; er aber betrauerte mehr das Unglück des Volkes als sein eigenes. Als er jedoch erfahren hatte, dass sein Volk den Sieg errungen hatte, sagte er: ‚Nun werde ich fröhlich lebend und sterbend erdulden, was immer der Herr entschieden hat.‘ Obgleich ihm aber die rechte Hand abgetrennt worden war und er eine schwere Wunde im Bauch, wo dieser in den Unterleib übergeht, erhalten hatte, versprach er

<sup>1</sup> Vita Heinrici IV imperatoris, hg. von Wilhelm Eberhard (MGH SS rer. Germ. [58]), 3. Aufl. Hannover/Leipzig 1899, c. 4, S. 19: *Postea Saxoniam sepius cum exercitu ingressus, aut victor aut aequa manu recessit; sed ad ultimum reversus, tam notanda quam felici victoria vicit, magnumque mundo documentum datum est, ut nemo contra dominum suum consurgat. Nam abscisa R[?dolfus] dextera dignissimam periurii vindictam demonstravit, qui fidem domino suo regi iuratam violare non timuit; et tamquam alia vulnera non sufficerent ad mortem, accessit etiam huius membri pena, ut per poenam agnosceretur et culpa.* [\[Link\]](#)

<sup>2</sup> Brunos Buch vom Sachsenkrieg, hg. von Hans-Eberhard Lohmann (Dt. MA 2), Leipzig 1937, c. 124, S. 117 f.: *Interea Saxones ad sua castra reversi, reppererunt imminutam magnam partem sui gaudii, quia rex eorum Rodolfus duobus acceptis vulneribus, uno letali, altero deformi, magis quam suum dolebat casum populi. Sed cum cognovisset, quod suus haberet victoriam populus: ‚Nunc‘, ait, ‚laetus patiar vivus et moriens, quicquid voluerit Dominus!‘ Quamvis autem dextera manus illi fuisset amputata et grave vulnus haberet venter, ubi descendit ad ilia, tamen, ut illos, quos de sua morte videbat dolentes, consolaretur, se non in praesenti moriturum fidenter pollicetur; suique postponens curam, suis vulneratis ostendebat, quam deceret adhiberi medicinam. Qua fortitudine simul et pietate nostri principes valde commoti, concorditer omnes ei spoponderunt, ut, si Deus omnipotens illius vitam servare vellet, eo vivo, etiamsi utraque manu careret, Saxonia nullum alium rectorem eligeret. Qua fide multum ille laetatus, felici est morte resolutus.* [\[Link\]](#)

dennoch entschlossen nicht jetzt zu sterben, um jene, die er um seinen Tod trauern sah, zu trösten. Und seine eigene Heilung hintenanstellend, zeigte er seinen verwundeten Männern, welche Heilmittel angewendet werden sollten. Von solcher Tapferkeit und zugleich solcher Barmherzigkeit tief waren unsere Fürsten tief bewegt und versprachen alle einmütig, dass, falls der allmächtige Gott ihm das Leben erhalten wolle, dann würde Sachsen zu seinen Lebzeiten, auch wenn er beide Hände verlieren würde, keinen anderen Lenker wählen. Über solche Treue sehr erfreut, wurde er durch einen glücklichen Tod erlöst.

### 12.1.2 Die Sorge um das Seelenheil

Im Jahr 1066 hatte Heinrich IV. dem Domkapitel von Merseburg für das Seelenheil Judiths, der Tochter des Herzogs von Schweinfurt, ein Gut geschenkt, was durch die Originalurkunde bezeugt ist.<sup>3</sup> Die Merseburger Bischofschronik, die etwa ein halbes Jahrhundert nach den Ereignissen entstand, jedoch auf schriftlichen Aufzeichnungen und mündlichen Berichten beruht, berichtet von der späteren Umwidmung durch Bischof Werner:<sup>4</sup>

Zur Zeit dieses Bischofs starb an diesem Ort Judith, eine gewisse adelige Frau, und sie wurde in der Kirche zur südlichen Seite hin begraben. Für ihr Seelenheil gab Kaiser Heinrich IV., weil sie eine Verwandte von ihm war, unseren Brüdern ein Kobelene [Köbeldorf, bei Spergau (Leuna)] genanntes Gut und zur Bestätigung des Geschehenen eine besiegelte Urkunde. Unser Vater Werner, der dieses Gut mit großem Aufwand zurückgehalten hatte, verteilte es für zu Nutzen der Brüder so, dass an Mariä Verkündigung [25. März] ein für 18 Schilling erworbenes Mahl mit einer eigenen Lebensmittelration gegeben werden soll; ein zweites [Mahl] zur Erinnerung an König Heinrich II. [13. Juli], den Erneuerer unserer Kirche; ein drittes zu Petri Kettenfeier [1. August]; ein viertes zum Jahrestag König Rudolfs [15. Oktober], und ein fünftes zur Erinnerung an jene Judith. Außerdem sollten acht und eine halbe Mark Münzen zur gemeinsamen Verwendung der Brüder verteilt werden. Er kaufte auch das Gut Rossenetze [Raßnitz] mit al-

<sup>3</sup> MGH D H IV. 184 [\[Link\]](#). Vgl. RI III,3,3 Nr. 455 [\[Link\]](#).

<sup>4</sup> *Chronica episcoporum ecclesiae Merseburgensis*, hg. von Roger Wilmans, in: MGH SS 10, Hannover 1852, S. 157–212, hier S. 185: *Huius in temporibus Iuditha quedam nobilis femina hoc in loco obiit, sepultaque est in monasterio ad australem plagam, pro cuius anime redemcione imperator Heinricus IV. quia neptis sibi fuit, villam quandam Kobelene dictam in confirmationem facti cum sigillo fratribus nostris dedit. Hanc pater noster Wernherus magno labore retentam in usus fratrum sic dispertitus est, ut in annunciacione sancte Marie convivium cum prebenda privata 18 solidis comparatum daretur, in commemoracione regis Heinrici II. nostre ecclesie reparatoris secundum, in advincula Petri tercium, in anniversario regis Rodolphi quartum, et in memoria ipsius Iudithe quintum; insuper 8 marcas nummorum et dimidia in communem usum fratrum partirentur. Villam eciam quandam Rossenetze cum universis appertinentibus emit hancque in usum monachorum tribuit* [\[Link\]](#)

lem, was dazugehört, und gab dies den Mönchen [des Petersklosters] zum Gebrauch.

### **Fragen und Anregungen**

- Vergleichen Sie die beiden Berichte über den Tod Rudolfs und arbeiten Sie die zentralen Motive sowie die Mittel der Stilisierung und Deutungszuschreibung heraus.
- Charakterisieren Sie den Umgang des Bischofs von Merseburg mit der ursprünglichen Schenkung Heinrichs IV. und bewerten Sie die Glaubwürdigkeit der Überlieferung.

### **Lektüreempfehlungen**

Handle, Elisabeth/Kosch, Clemens, Standortbestimmungen. Überlegungen zur Grablage Rudolfs von Rheinfelden im Merseburger Dom, in: Canossa 1077 – Erschütterung der Welt. Geschichte, Kunst und Kultur am Aufgang der Romanik, hg. von Christoph Stiegemann/Matthias Wemhoff, Bd. 1, München 2006, S. 529–541.

## 12.2 Das Grabmal Roberts von Neapel (gest. 1343) in Santa Chiara (Neapel)

König Robert von Neapel ließ sich in der Santa Chiara in Neapel ein Grabmal errichten, das aus mehreren Ebenen besteht und durch die überlebensgroße Thronfigur unter dem 15 Meter hohen Baldachin dominiert wird. Es wurde später umgebaut und im Zweiten Weltkrieg beschädigt, so dass für seine Rekonstruktion auch auf ältere Darstellungen zurückgegriffen werden muss.

Heutige Form:

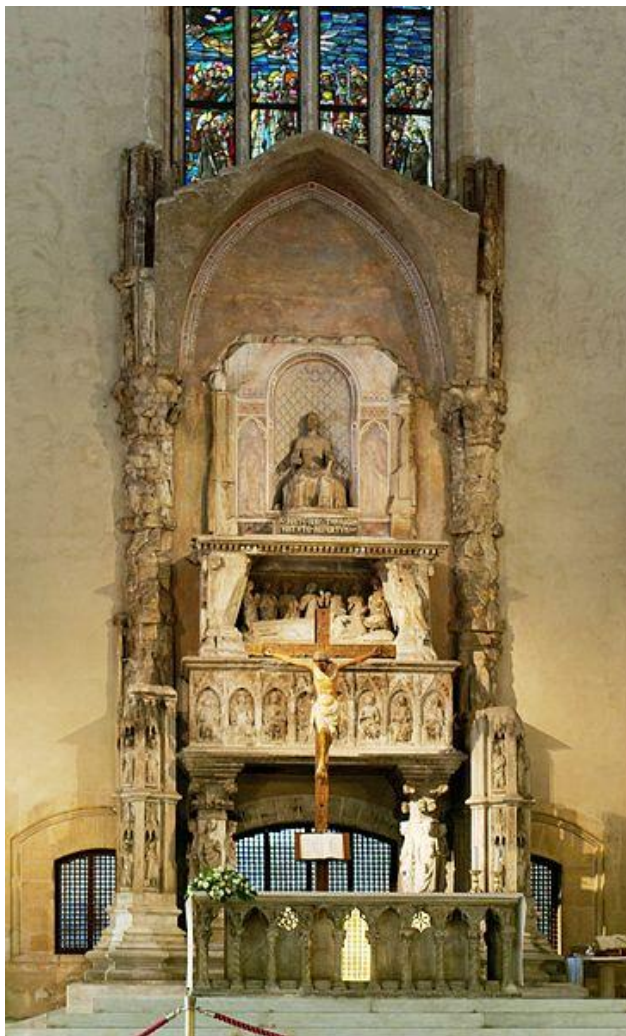

Wikipedia, Foto Berthold Werner, CC BY-SA 3.0. [\[Link\]](#)

Für die Verortung innerhalb der Kirche siehe [\[Link\]](#).

Zustand vor 1943:

Abbildungen bei: Heidemann, Grit/Scirocco, Elisabetta, Die Kirchen Santa Chiara und Santa Maria di Monteoliveto als Bestattungsorte der Adligen in Neapel, in: Working Papers des Sonderforschungsbereiches 640, Nr. 2, 2010, hier S. 10, 11, 13; URL: <http://dx.doi.org/10.18452/3240>.

Stich aus dem 19. Jahrhundert:

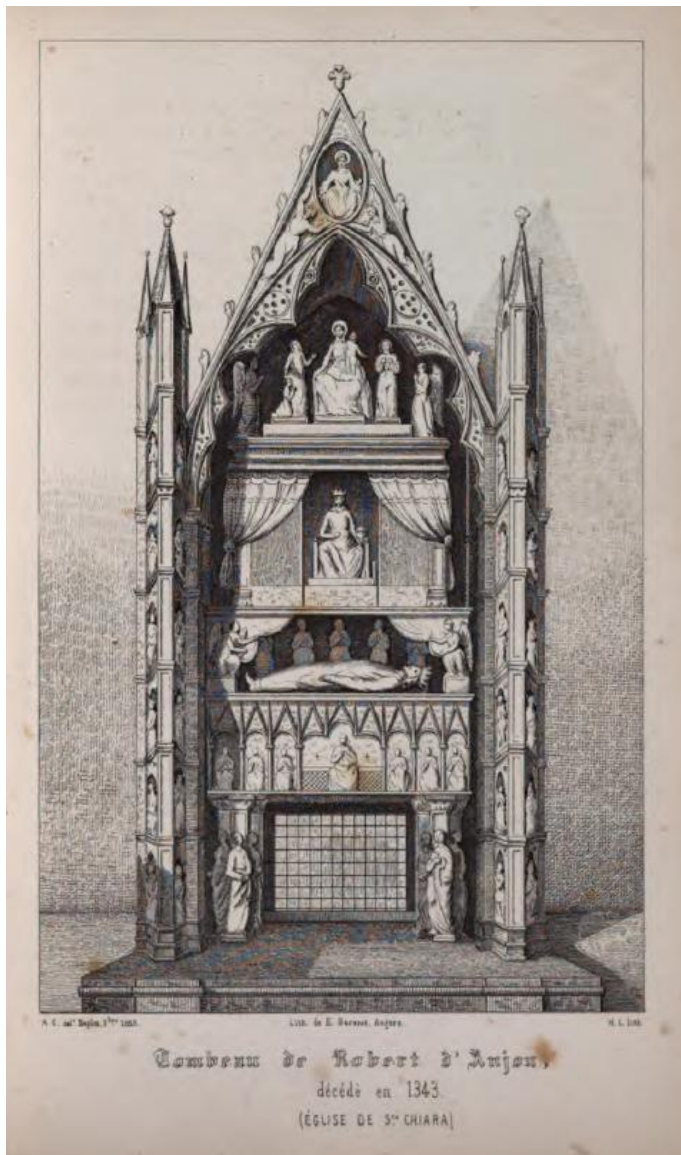

Godard-Faultrier, Victor, D'Angers au Bosphore pendant la guerre d'Orient. Constantinople, Athènes, Rome. Impressions, Curiosités, Archéologie, Art et Histoire, Établissements chrétiens, Monuments byzantins. Souvenirs d'Anjou à Malte, Naples, Paris 1868, nach S. 338 [danach auch die nebenstehenden Grabmäler]. [[Link Bild](#)] [[Link Werk](#)]



Stich aus dem 17. Jahrhundert:

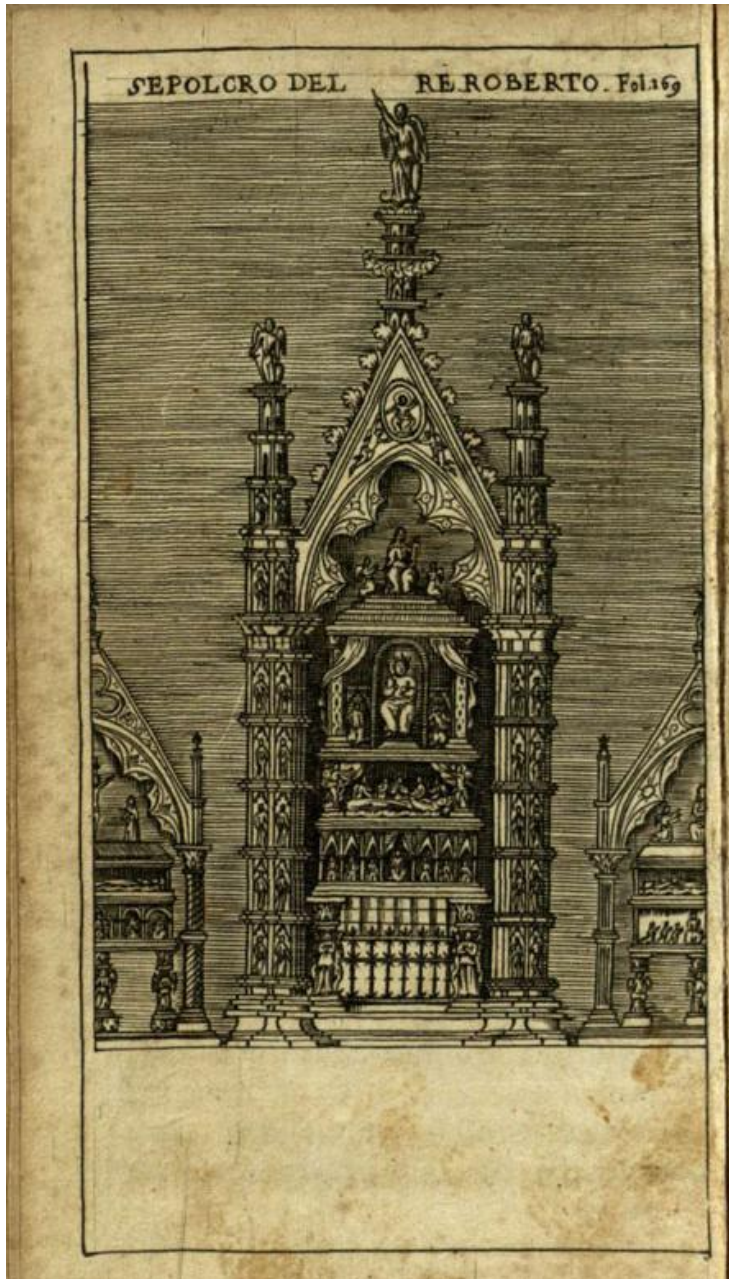

Sarnelli, Pompeo, Guida de' forestieri, curiosi di vedere, e d'intendere le cose piu notabili della regal città di Napoli, e del suo amenissimo distretto [...], Napoli 1685, S. 169. [[Link](#)]

### Fragen und Anregungen

- Beschreiben Sie das Grabmal Roberts von Anjou in den verschiedenen Zuständen. Schildern Sie die unterschiedliche Wirkung.

- Überlegen Sie, wie sich die Gesamtinterpretation durch fehlende Darstellungen einzelner oder mehrerer Zustände verändern würde. Beziehen Sie auch die anderen Grabmäler in der Kirche in Ihre Überlegungen mit ein.
- Schildern Sie die Gesamtkonzeption und die Darstellung im Detail und erörtern Sie, wie sich der König präsentierte und welche politische bzw. religiöse Dimension das Grabmal aufweist. Diskutieren Sie, ob sich die Zwei-Körper-Theorie auf das Grabmal anwenden ließe.

### Lektüreempfehlungen

Heidemann, Grit/Scirocco, Elisabetta, Die Kirchen Santa Chiara und Santa Maria di Monteoliveto als Bestattungsorte der Adligen in Neapel, in: Working Papers des Sonderforschungsbereiches 640, Nr. 2, 2010, URL: <http://dx.doi.org/10.18452/3240>.

Michalsky, Tanja, Memoria und Repräsentation. Die Grabmäler des Königshauses Anjou in Italien (Veröffentlichungen des Max-Planck-Instituts für Geschichte 157), Göttingen 2000, S. 325–341.
