# Supplementary material
Source: publisher site journal article supplement (https://www.degruyterbrill.com/publication/isbn/9783110442656/downloadAsset/9783110442656_Buettner%20Koenigsherrschaft.zip)
Supplement: Supplementary file 5 [file mark_splm_9783110442649_Buttner Konigsherrschaft Kap. 13 Heilige Herrscher.pdf › mark_splm_9783110442649_Buttner Konigsherrschaft Kap. 13 Heilige Herrscher.pdf]

## 13 Heilige Herrscher – Zusatzmaterial

### 13.1 Ludwig IX. von Frankreich als idealer Herrscher

Auszüge aus der zweiten Kanonisationsansprache von Papst Bonifaz VIII. am 11. August 1297 über die Kanonisation Ludwigs IX. von Frankreich:<sup>1</sup>

Der Frieden stiftende König ist erhoben worden (*Rex pacificus magnificatus est*) [...]. König Ludwig wird durch drei Dinge empfohlen: Erstens von seinem ausgezeichneten Stand, weil er König ist (*quia rex*). Zweitens von den Gaben und Tugenden, weil er Frieden stiftend ist (*quia pacificus*). Drittens von Belohnungen und Entlohnungen, weil er in der kämpfenden Kirche erhoben ist (*quia magnificatus*).

Zum ersten Punkt ist zu bemerken, dass wer sich selbst und seine Untergebenen gut regiert, wahrhaft König ist. Aber wer es nicht versteht, sich und die Untergebenen zu regieren, muss mutig gesagt bekommen, dass er ein falscher König ist. Dieser aber war in Wahrheit ein König, weil er sich selbst und seine Untertanen wahrhaft (*vere*), gerecht (*iuste*) und heilig (*sancte*) regierte. Er hat nämlich sich selbst regiert, weil er das Fleisch dem Geist und alle Bewegungen der Sinnlichkeit dem Verstand unterworfen hat. Ebenso regierte er die Untergebenen gut, weil er sie in allen Dingen durch Gerechtigkeit (*iustitia*) und Billigkeit (*aequitas*) beschützte. Er regierte auch die Kirchen, weil er die kirchlichen Rechte und die Freiheiten der Kirche unverletzt bewahrte. Aber diejenigen, die tatsächlich nicht gut regieren, sind keine Könige.

Zweitens wird er durch Gaben und Tugenden empfohlen, weil er Frieden stiftend (*pacificus*) genannt wird, das heißt Frieden machend (*id est pacem faciens*). Denn durch diese Gabe und Tugend werden die übrigen Gaben und Tugenden verstanden. Er war nämlich Frieden stiftend in sich und gegenüber allen, nicht nur den Untergebenen, sondern auch den Auswärtigen. In sich war er Frieden stiftend. Er hatte nämlich den Frieden der Zeit, den Frieden des Herzens, und deswegen erreichte er schließlich den Frieden der Ewigkeit. In welchem Maße er aber sein Königreich im Frieden bewahrte, das wissen alle, die zu jener Zeit lebten. Diesen Frieden gibt es aber nicht ohne Gerechtigkeit (*iustitia*), er folgt nämlich der Gerechtigkeit. Und weil er gerecht war gegenüber sich selbst, gegenüber Gott und gegenüber dem Nächsten, deshalb hatte er den Frieden.

Hieraus folgt drittens, dass er erhoben (*magnificatus*) ist, das heißt groß gemacht (*id est magnus factus*), nicht nur in der gegenwärtigen Kirche, sondern auch im Vaterland (*patria*). Es ist aber zu beachten, dass umgangssprachlich (*vulgariter loquendo*) jemand aus vier Gründen groß (*magnus*) genannt wird, nach vierfacher

---

<sup>1</sup> Rex pacificus, hg. von Natalis de Wailly/Léopold Victor Delisle/Charles-Marie-Gabriel Bréchillet Jourdain, in: Recueil des Historiens des Gaules et de la France, Bd. 23, Paris 1894, S. 152 f. [[Link](#)]

Abmessung: Nämlich erstens weil er lang (*longus*) ist, zweitens weil er weit (*latus*) ist, drittens weil er tief (*profundus*) ist, viertens weil er hoch (*altus*) ist. Dies hatte der heilige König (*sanctus rex*) im geistlichen Sinne (*spiritualiter*).

Er war nämlich lang durch Ausdauer und Langmütigkeit im Guten. Von Kindheit an begann er nämlich gut zu leben und beharrte darin bis zum Ende. [...; Verweis auf zwei Bibelstellen]

Zweitens wird er groß genannt, weil weit (*latus*) war, oder breit (*amplus*); und dies durch die Nächstenliebe (*caritas*). Nach: ‚Stark war Joshua (*Jesus Nave*) im Krieg‘ und dem Folgenden: ‚Der groß war nach seinen Worten, am größten in der Rettung der Auserwählten Gottes‘ [Sir 46,1] Es gibt nämlich bei den Menschen keine Erinnerung, wie wir glauben, dass ihm zu unseren Zeiten jemand ähnliches gefunden wurde, der so sehr für das Wohl der anderen eiferte. Das zeigte sich gut, als er selbst und seine Brüder von den Sarazenen gefangengenommen worden waren. Er ertrug nämlich weder seine Befreiung noch die seiner Brüder, bevor nicht alle anderen, wie viele auch immer gefangen waren, zuerst befreit worden waren.

Drittens wird er groß genannt, weil er tief (*profundus*) war, und dies durch die Demut (*humilitas*). Je mehr sich nämlich der Mensch tief erniedrigt, desto größer wird er bei Gott angesehen. [...; Verweis auf eine Bibelstelle] Und weil er sich überaus tief erniedrigte, deswegen ragt er bei Gott durch Verdienst groß hervor. Und daher kann auf ihn bezogen werden, was über Samuel gesagt wird: ‚Samuel wurde erhoben bei Gott.‘ [1 Sam 2,21] Dieser aber erniedrigte sich innerlich und äußerlich, in der Sprache, im Herzen, in der Kleidung, in Reden. Und dies können wir sicher erklären, dass sein Gesicht gütig und voll der Gnaden zeigte, dass er über den Menschen (*supra hominem*) war. Es wurde aber übereinstimmend durch Samuel erklärt, dass er ‚Gott gehorchend‘ ausdeutete: Er folgte nämlich Gott bis zum Tod.

Viertens wird er groß genannt, weil er hoch (*altus*) oder erhoben (*elevatus*) war durch das richtige Streben nach Gott. Er schrieb alles, was er tat, Gott zu, und ihm gab er Dank für das Handeln. Nach dem, was im Psalter gesagt wird: ‚Nicht uns, Herrn, nicht uns; sondern deinem Namen gib Ruhm.‘ [Ps 115,1] [...; Verweis auf eine weitere Bibelstelle]

Es liegt daher offen, wie diesem Heiligen die anfangs vorgetragenen Worte [der Beginn der Predigt] ‚Der Frieden stiftende König ist erhoben worden‘ (*Rex pacificus magnificatus est*) zukommen. Und weil er so vierfach groß war auf Erden, so wie gesagt wurde, daher müssen wir ganz und gar annehmen, dass er auch im Himmel erhoben sein wird. Zur göttlichen Gerechtigkeit gehört nämlich, dass wer im Leben gut und gerecht war, in Ruhm erhoben und erhöht wird. Das wird durch ihn bezeugt durch viele und große Wunder, die der Herr durch ihn zeigte. Und deswegen glauben wir, dass er im Himmel verherrlicht und erhoben ist. Und deswegen haben wir ihn in das Verzeichnis der Heiligen eingeschrieben, und wir befehlen allen gläubigen Christen, dass sie ihn wie einen Heiligen und einen durch viele Wunder Bezeichneten verehren sollen und sie sollen seinen Schutz mit andächtigem Herzen erbitten, dass er ihnen zur Hilfe kommt. Was uns der zu gewähren für würdig halten möge, der lebt und herrscht etc. Amen.

## Fragen und Anregungen

- Schildern Sie den Aufbau der Predigt und nennen Sie die vom Papst hervorgehobenen Eigenschaften, um die Heiligkeit Ludwigs IX. zu begründen.
- Vergleichen Sie dieses Bild mit den in der Kanonisationsurkunde geschilderten Vorzügen Ludwigs und mit seiner tatsächlichen Regierungszeit.
- Erörtern Sie, worin der (faktische wie argumentative) Schritt vom idealen zum heiligen Herrscher liegt.

## Lektüreempfehlungen

Carolus-Barré, Louis, *Le procès de canonisation de saint Louis (1272–1297). Essai de reconstitution* (Collection de l'École Française de Rome 195), Roma 1994.

Gaposchkin, Marianne Cecilia, *The Making of Saint Louis. Kingship, Sanctity, and Crusade in the Later Middle Ages*, Ithaca 2008.

Krafft, Otfried, *Papsturkunde und Heiligsprechung. Die päpstlichen Kanonisationen vom Mittelalter bis zur Reformation. Ein Handbuch* (Archiv für Diplomatik, Schriftgeschichte, Siegel- und Wappenkunde. Beiheft 9), Köln/Weimar/Wien 2005, S. 624–666.

Le Goff, Jacques, *Ludwig der Heilige*, Stuttgart 2000.

## **13.2 Der heilige Ludwig von Toulouse krönt Robert von Neapel (ca. 1317)**

Abbildungen des Gemäldes von Simone Martini, das sich heute im Museo nazionale di Capodimonte in Neapel befindet (Größe: 250x138 cm) und den heiligen Ludwig von Toulouse zeigt, wie er seinem jüngeren Bruder König Robert von Neapel die Krone aufsetzt, findet sich vielfach im Internet, beispielsweise auf Wikimedia Commons. [[Link](#)]

### 13.3 Mittelalterliche Karlsreliquiare

#### Fragen und Anregungen

- Erstellen Sie eine Bildersammlung der mittelalterlichen Karlsreliquiare (v. a.: Armreliquiar aus dem 12. Jh.; Karlsschrein, fertiggestellt 1215; Kopfreliquiar und Reliquienkapelle aus dem 14. Jh.; Armreliquiar aus dem 15. Jh.).
- Schildern Sie die durch die Reliquiare hervorgerufenen Bilder des Heiligen.
- Erarbeiten Sie die möglichen Entstehungskontexte der Reliquiare. Diskutieren Sie den Stellenwert, der ihnen neben der religiösen Verehrung in der politischen Kommunikation und Herrschaftslegitimation zukam.

#### Lektüreempfehlungen

Belghaus, Viola, *Intravimus ergo ad Karolum* – Grab, Reliquien und Reliquiare Karls des Großen, in: Charlemagne et les objets. Des thésaurisations carolingiennes aux constructions mémorielles, hg. von Philippe Cordez (L'Atelier 5), Bern et al. 2012, S. 169–208.

Grimme, Ernst Günther, Der Aachener Domschatz (Aachener Kunstblätter 42), Düsseldorf 1972.

Grimme, Ernst Günther, Mittelalterliche Karlsreliquiare. Die Verehrung Karls des Großen, dargestellt anhand von Aachener Reliquienbehältern und anderen Werken der Goldschmiedekunst, in: Aachener Kunstblätter 16, 1957, S. 30–36.  
[\[Link\]](#)

Kroos, Renate, Zum Aachener Karlsschrein. „Abbild staufischen Kaisertums“ oder „fundatores ac dotatores“?, in: Karl der Große als vielberufener Vorfahr. Sein Bild in der Kunst der Fürsten, Kirchen und Städte, hg. von Lieselotte E. Saurma-Jeltsch (Schriften des Historischen Museums Frankfurt am Main 19), Sigmaringen 1994, S. 49–61.

Lepie, Herta/Minkenbergh, Georg, Der Domschatz zu Aachen (Museen und Schatzkammern in Europa 1), Regensburg 2010.
