# Supplementary material
Source: publisher site journal article supplement (https://www.degruyterbrill.com/publication/isbn/9783110442656/downloadAsset/9783110442656_Buettner%20Koenigsherrschaft.zip)
Supplement: Supplementary file 6 [file mark_splm_9783110442649_Buttner Konigsherrschaft Kap. 14 Rezeption und Forschung.pdf › mark_splm_9783110442649_Buttner Konigsherrschaft Kap. 14 Rezeption und Forschung.pdf]

## 14 Rezeption und Forschung – Zusatzmaterial

### 14.1 Johann Friedrich Böhmer und die Regesta Imperii (RI)

Programmatisch stellte Johann Friedrich Böhmer (1795–1863) seinem ersten, 1831 erschienenen Band der Regesta Imperii ein Gedicht von Friedrich Rückert (1788–1866) voran:<sup>1</sup>

Gleichwie ein reicher Mann, der denkt zu sterben,  
Zuletzt noch einmal misst mit ruhig kalter  
Besonnenheit sein Gut nach Zahl und Malter  
Dass es in Ordnung finden seine Erben:

So seh' ich dich, mein Volk, da du vom herben  
Verhängnis wardst gedrängt ins Greisenalter  
Wie nun auch du durch emsige Verwalter  
Einsammeln lässtest deines Hausraths Scherben.

Was irgend noch von alter Geisteshabe,  
Die du gewannst durch mehr als ein Jahrhundert,  
Sich finden mag, zusammen wird's gelesen

Und aufgespeichert, dass, wenn einst im Grabe  
Du selber ruhst, die Folgezeit verwundert  
Erkenne daraus wie reich du bist gewesen.“

#### Fragen und Anregungen

- Schildern Sie die Gedanken, Wünsche und Stimmung, die mit dem Gedicht zum Ausdruck gebracht werden sollen.
- Ordnen Sie das Wirken Johann Friedrich Böhmers in den politischen Kontext seiner Zeit ein.

---

<sup>1</sup> Böhmer, Johann Friedrich, Regesta chronologico-diplomatica regum atque imperatorum Romanorum inde a Conrado I. usque ad Henricum VII. Die Urkunden der römischen Könige und Kaiser von Conrad I. bis Heinrich VII. (911–1313) in kurzen Auszügen mit Nachweisung der Bücher, wo solche abgedruckt sind, Frankfurt am Main 1831, S. II. [\[Link\]](#)

## Lektüreempfehlungen

Maaser, Michael, Art. „Böhmer, Johann Friedrich (1795–1863)“, in: HRG 1, 2. Aufl. Berlin 2005, Sp. 639–640.

Ottner, Christine, Joseph Chmel und Johann Friedrich Böhmer: Die Anfänge der Regesta Imperii im Spannungsfeld von Freundschaft und Wissenschaft, in: Wege zur Urkunde, Wege der Urkunde, Wege der Forschung: Beiträge zur europäischen Diplomatik des Mittelalters, hg. von Karel Hruza/Paul Herold (Forschungen zur Kaiser- und Papstgeschichte des Mittelalters. Beihefte zu J. F. Böhmer, Regesta Imperii 24), Köln 2005, S. 257–291.

Zimmermann, Harald, Verschiedene Versuche, Vergangenheit vollständig zu vermitteln, in: Die Regesta Imperii im Fortschreiten und Fortschritt, hg. von Harald Zimmermann (Forschungen zur Kaiser- und Papstgeschichte. Beihefte zu J. F. Böhmer, Regesta Imperii 20), Köln/Weimar/Wien 2000, S. 1–17.

## 14.2 Die Standortgebundenheit historischen Arbeitens

Goetz, Hans-Werner, Einführung: Die Gegenwart des Mittelalters und die Aktualität der Mittelalterforschung, in: Die Aktualität des Mittelalters, hg. von Hans-Werner Goetz (Herausforderungen 10), Bochum 2000, S. 7–23, hier S. 8:

„Sicherlich sind wir heute abgeklärt gegenüber solchen Deutungen (und nur deshalb erkennen wir so mühelos deren Zeitgebundenheit), weil uns meist weder das mittelalterliche Kaisertum noch eine expansive Ostpolitik mehr innerlich berühren. Doch sind wir aller Voraussicht nach gegenüber zeitgebundenen Deutungen kaum weniger anfällig oder unideologischer geworden. Unsere eigenen ‚Borniertheiten‘ haben sich lediglich auf andere Sachverhalte und Ebenen verlagert [...]. Dieser Sachverhalt mag verwirrend sein, doch ist er konstitutiv für die Geschichtswissenschaft, denn er gewährleistet den Gegenwartsbezug der Geschichte und der historischen Forschung, welche die Vergangenheit (sich selbst und anderen) aus ihrer jeweiligen Zeit heraus und für die eigenen Zeitgenossen (und nicht für eine diffuse zeitlose Gültigkeit) vergegenwärtigt und damit den Normen ihrer Zeit unterliegt.“

### Fragen und Anregungen

- Diskutieren Sie die vertretene Sichtweise und erörtern Sie, welche Einflussfaktoren in unserer heutigen Zeit die Beschäftigung mit Geschichte besonders bestimmen.
- Entwickeln Sie eine eigene Position zum Umgang mit der historischen Vergangenheit und deren Rekonstruktion durch den Historiker. Nehmen Sie hierzu u. a. zu folgenden Fragen Stellung: Welche Herangehensweise haben Sie an Geschichte und ihre wissenschaftliche Erforschung? Von welchen Prämissen gehen Sie aus? Welche Aspekte bevorzugen Sie? Welchen Erklärungsansätzen messen Sie eine höhere Bedeutung bei?

## 14.3 Abschlussreflexion – Verortung des Werks

### Fragen und Anregungen

- Beschreiben Sie Aufbau und Schwerpunktsetzung des vorliegenden Werks „Königsherrschaft im Mittelalter“. Erörtern Sie das ihm zugrundeliegende Verständnis von Mittelalter und Geschichtswissenschaft.
- Diskutieren Sie Form und Inhalt des Werks: Was empfinden Sie als gelungen, wo sehen Sie Schwächen? Welche Schwerpunkte und Ansätze scheinen Ihnen relevant, welche Aspekte zu wenig behandelt?
- Schreiben Sie eine Rezension über das vorliegende Werk (etwa 2000–4000 Zeichen), in der Sie zunächst beschreiben und dann werten.
- Vergleichen Sie Ihre Eindrücke mit anderen Rezensionen (Kommilitonen, Rezensionen wie sehpunkte [\[Link\]](#) oder H-Soz-Kult [\[Link\]](#), Fachzeitschriften). Erörtern Sie, ob Rezensionen Erkenntnisse über das besprochene Werk oder über den Rezensenten vermitteln.

### Lektüreempfehlungen

Steffens, Henry J./Dickerson, Mary Jane/Schmale, Wolfgang, Kurze wissenschaftliche Arbeiten schreiben, in: Schreib-Guide Geschichte. Schritt für Schritt wissenschaftliches Schreiben lernen, hg. von Wolfgang Schmale (UTB 2854), Wien/Köln/Weimar 2006, S. 83–122, hier S. 85–94 zum Schreiben einer Rezension.
