# Supplementary material
Source: publisher site journal article supplement (https://www.degruyterbrill.com/publication/isbn/9783110442656/downloadAsset/9783110442656_Buettner%20Koenigsherrschaft.zip)
Supplement: Supplementary file 7 [file mark_splm_9783110442649_Buttner Konigsherrschaft Kap. 2 Mittelalterliche Konigsherrschaft in den Quellen.pdf › mark_splm_9783110442649_Buttner Konigsherrschaft Kap. 2 Mittelalterliche Konigsherrschaft in den Quellen.pdf]

## 2 Mittelalterliche Königsherrschaft in den Quellen – Zusatzmaterial

### 2.1 Die Krönung Heinrichs II. im Regensburger Sakramentar

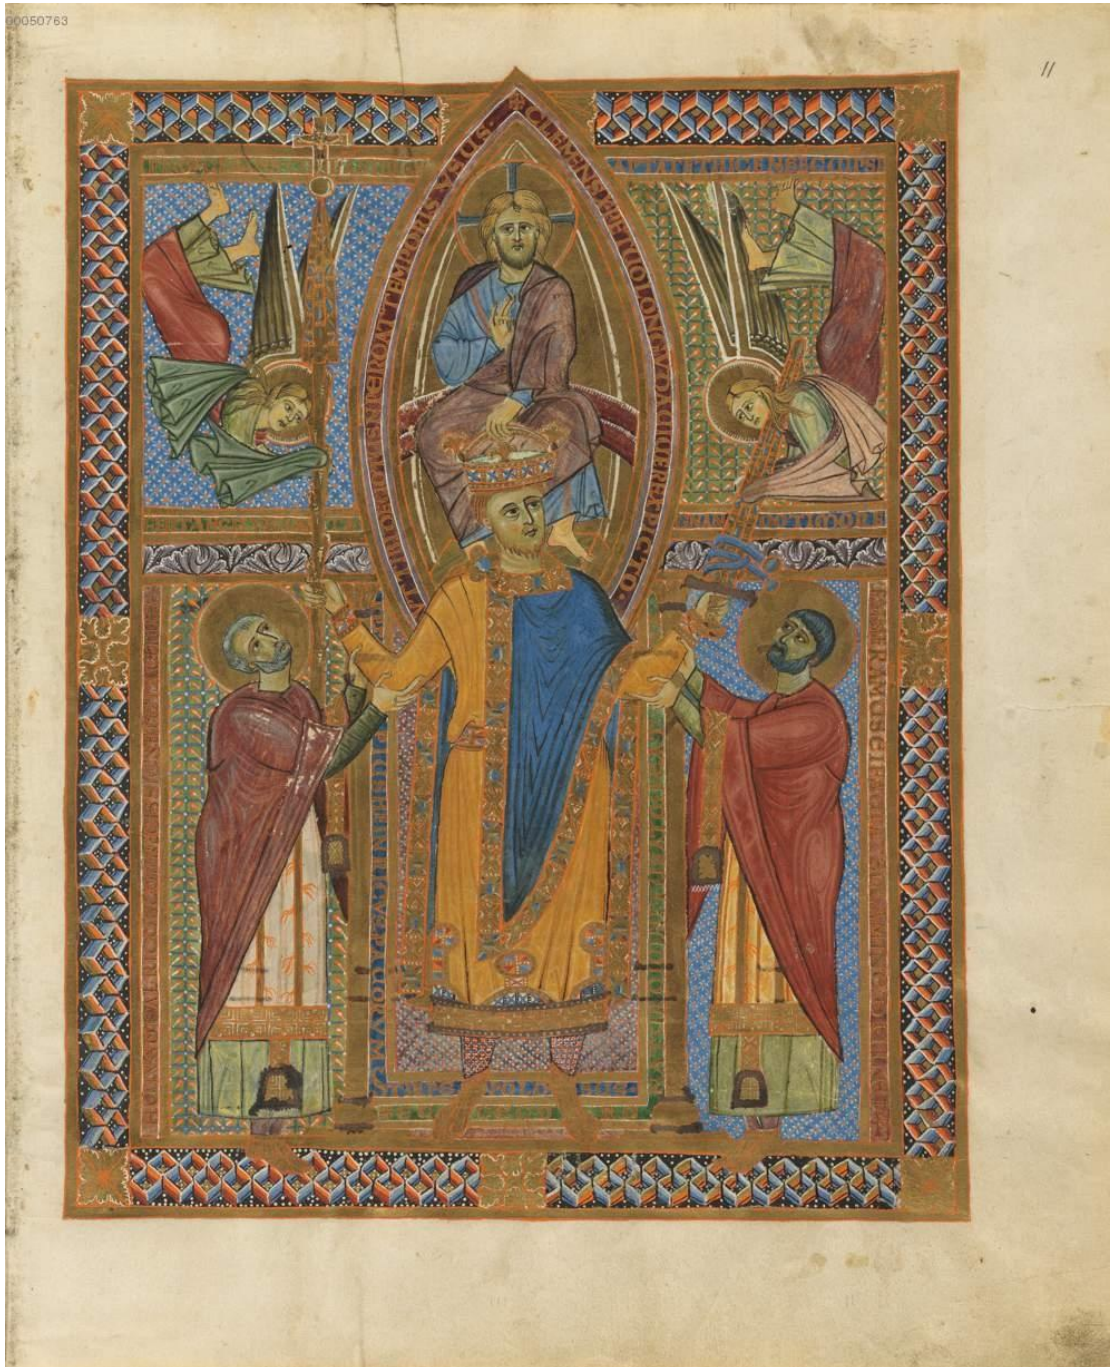

Abbildung: Krönungsbild Heinrichs II. im Regensburger Sakramentar, ca. 1002–1014; München, Bayerische Staatsbibliothek, Clm 4456, fol. 11r, URL: [http://daten.digital-sammlungen.de/bsb00050763/image\\_24](http://daten.digital-sammlungen.de/bsb00050763/image_24) (letzter Zugriff 1.10.2017).

## Fragen und Anregungen

- Erörtern Sie Gestaltung und Botschaft der Darstellung, indem Sie dem Schema „Vorikonographische Beschreibung“ – „Ikonographische Analyse“ und „Ikonologische Interpretation“ folgen. Thematisieren Sie dabei auch das Verhältnis von Bild und Text (Transkription mit Übersetzung bei „Haus der Bayerischen Geschichte, Das Krönungsbild aus dem Regensburger Sakramentar“, s. u.).
- Nennen Sie Aspekte königlicher Herrschaft, die in der Darstellung zum Ausdruck kommen.
- Vergleichen Sie die Darstellung mit der desselben Herrschers im Regensburger Evangeliar aus Montecassino (Kapitel 4, Abb. 6, S. 51) und erläutern Sie Gemeinsamkeiten und Unterschiede.

## Lektüreempfehlungen

Bussmann, Benjamin, Die Historisierung der Herrscherbilder (ca. 1000–1200) (Europäische Geschichtsdarstellungen 13), Köln/Weimar/Wien 2006, S. 45–64.

Figurski, Paweł, Das sakramentale Herrscherbild in der politischen Kultur des Frühmittelalters, in: Frühmittelalterliche Studien 50, 2016, S. 129–161, hier S. 136–150.

Haus der Bayerischen Geschichte, Das Krönungsbild aus dem Regensburger Sakramentar, URL: <http://www.hdbg.de/heinrich-site/german/objekt/jan/objekt.html> (letzter Zugriff: 1.10.2017).

Körntgen, Ludger, Königsherrschaft und Gottes Gnade. Zu Kontext und Funktion sakraler Vorstellungen in Historiographie und Bildzeugnissen der ottonisch-frühsalischen Zeit (Orbis mediaevalis 2), Berlin 2001, S. 212–216.

## 2.2 Die Königsurkunde als Quelle

Friedrich II. verspricht Herzog Friedrich III. von Lothringen in einer Urkunde vom 5. Oktober 1212 eine Entschädigung für seine bisherigen und zukünftigen Dienste.<sup>1</sup>

Friedrich von Gottes Gnaden erwählter Römischer Kaiser und immer Augustus, König von Sizilien, des Herzogtums Apulien und des Fürstentums Capua allen in Ewigkeit.

Damit nicht jemand nicht weiß, welche Dinge für die Ehre und den allgemeinen Nutzen des guten Zustands des gesamten Kaiserreichs auf Ratschlag und Zustimmung der Fürsten oder von der königlichen Großzügigkeit bestimmten und bewährten Getreuen des Reichs gegeben worden sind, wollen wir den Gegenwärtigen wie den Zukünftigen, die diese Urkunde einsehen, bekannt machen, dass wir dem geliebten Friedrich, Herzog von Lothringen, unserem Blutsverwandten, der, so wie er aufgrund des Bluts verpflichtet war, bereitwillig und freiwillig unsere Rechte und die Notwendigkeit des Reichs anerkennend den Gehorsam zu uns wandte, 3000 Mark Silber versprochen haben und seinem Rat 200 Mark, dafür, dass er dadurch für die Ausgaben in Bezug auf die Soldaten und die zu leistende Beschäftigung in kriegerischen Dingen besser in der Lage ist.

Für diese Summe Geldes verpflichten wir ihm die nachgenannten Bürgen, unsere geliebten Fürsten, der Erzbischof von Mainz und der Bischof von Worms und unsere Getreuen, Graf Poppo von Laufen, unser Hofmarschall Anselm von Justingen, unser Truchsess Wernher von Boland und dessen Bruder Philipp für 700 Mark, Heinrich von Cungesberg für 500 Mark, Graf Rudolf von Habsburg aber für 1000 Mark. Außerdem, das was von dem Hof Rosheim als uns zustehend bekannt ist, erkennen wir ihm als verpfändet an für die übrigen 1000 Mark unter dieser Form, dass, sobald wir in Kürze mit Gottes Hilfe wieder Geld haben werden, so dass wir die vorgenannte Summe begleichen können und unsere vorgenannten Bürgen vom vorgenannten Herzog, unserem Blutsverwandten, vorab informiert wurden, wir sie ihm ohne die Schwierigkeit irgendeiner Verweigerung vollständig bezahlen. Wenn es aber eintreten sollte, dass wir die so große Summe des Geldes oder Silbers schnell [nicht haben sollten], haben wir uns, so dass der Herzog angemessener in seiner Bezahlung befriedigt werden kann, verpflichtet diesem die Hälfte der 3000 Mark auszubezahlen und den Rest, sobald sich die Möglichkeit uns bietet und unsere vorgenannten Bürgen vom Herzog eine Erinnerung empfangen. Dass, falls es vielleicht vorkommen sollte, dass es niemals erfüllt wird, er den Teil des vorgenannten Hofes, so wie er uns gehört, als Pfand nach Rechtstitel und gesetzmäßigem Lehnrecht besitzen soll. Wenn wir aber für die 1000 Mark Silber dem Herzog Bürgen gegeben haben werden zum kommenden Geburtsfest des Herrn, dann wird jener Teil des vorgenannten Hofes zu uns zurückkehren, und er wird nicht dem Herzog wegen des Vorgenann-

---

<sup>1</sup> Die Urkunden Friedrichs II., Bd. 2: 1212–1217, bearbeitet von Walter Koch (MGH DD Germ. 14,2), Hannover 2007, Nr. 174, S. 10–13 [[Link](#)].

ten in irgendeiner Weise weiter verpfändet sein. Außerdem wollen wir, dass mit der ersten Bezahlung, die wir ihm leisten, der ehrwürdige Erzbischof und seine Genossen von ihrer Bürgschaft befreit werden sollen.

Zur größeren Erinnerung, Kraft und Zeugnis dieser Dinge haben wir befohlen, das vorliegende Schriftstück mit unserem Majestätssiegel zu befestigen. Gegeben in Hagenau, am 5. Oktober, im Jahr des Herrn 1212, in der 15. Indiktion, glücklich.

### Fragen und Anregungen

- Gliedern Sie die Urkunde und fassen Sie ihren Inhalt zusammen. Ordnen Sie die Urkunde in den politischen Kontext des Jahres 1212 ein.
- Vergleichen Sie die Urkunde mit dem Privileg Ottos I. für das Kloster Corvey von 936 (MGH D O I. 3). Erläutern Sie Gemeinsamkeiten und Unterschiede im Bild königlicher Herrschaft, das sich aus der Quelle ergibt.
- Erörtern Sie, welcher Stellenwert Urkunden (und Verwaltungsschriftgut) bei der Erforschung der Königsherrschaft zukommt und welche quellenkritischen Überlegungen bei dieser Quellengattung besonders beachtet werden müssen.
- Erläutern Sie die Schwierigkeiten, die sich für die Erforschung des Themas „Königsherrschaft“ im Allgemeinen aufgrund der Quellenlage ergeben.
- Diskutieren Sie, in welchem Maße diese Schwierigkeiten die Geschichtswissenschaft insgesamt betreffen und inwiefern sich die Erforschung der „Königsherrschaft“ von anderen Themen wie beispielsweise der Alltags- oder Bildungsgeschichte unterscheidet.

### Lektüreempfehlungen

Stürner, Wolfgang, Friedrich II. 1194–1250, 2 Bde., 3. Aufl. Darmstadt 2009, Bd. 1, S. 114–184, besonders S. 151–161.

Stürner, Wolfgang, Friedrich II. greift nach dem Staufererbe. Sein Zug von Sizilien nach Deutschland im Jahr 1212, in: Konrad IV. (1228–1254). Deutschlands letzter Stauferkönig, hg. von Gesellschaft für staufische Geschichte e.V (Schriften zur staufischen Geschichte und Kunst 32), Göttingen 2012, S. 116–133.
