# Supplementary material
Source: publisher site journal article supplement (https://www.degruyterbrill.com/publication/isbn/9783110442656/downloadAsset/9783110442656_Buettner%20Koenigsherrschaft.zip)
Supplement: Supplementary file 8 [file mark_splm_9783110442649_Buttner Konigsherrschaft Kap. 3 Wurzeln und Deutung des fruhen Konigstums.pdf › mark_splm_9783110442649_Buttner Konigsherrschaft Kap. 3 Wurzeln und Deutung des fruhen Konigstums.pdf]

### 3 Wurzeln und Deutungen des frühen Königtums – Zusatzmaterial

#### 3.1 Die Wagenrennen Chilperichs I. (gest. 584)

Der Geschichtsschreiber Gregor berichtet über den Merowingerkönig Chilperich I. zum Jahr 577:<sup>1</sup>

Dies [Gebietsforderungen König Guntrams I. und Childeberts II. an Chilperich] erwog er, befahl in Soissons und Paris eine Wagenrennbahn zu bauen und bot den Völkern ein Schauspiel dar.

Giesebrecht 1878, S. 245

Jener aber achtete nicht darauf, sondern ließ zu Soissons und zu Paris Ringbahnen bauen und sie dem Volke zum Schauspiel öffnen.

Buchner 1955, Bd. 1, S. 310:

Jener aber achtete nicht darauf, sondern ließ zu Soissons und zu Paris einen Zirkus errichten und dem Volke zum Schauspiel öffnen.

Gebauer 1988, Bd. 2, S. 41:

Jener aber achtete nicht darauf, sondern ließ zu Soissons und zu Paris einen Zirkus bauen und dem Volke zum Schauspiel öffnen.

Jussen 2005, S. 16:

Er ließ zu Soissons und Paris eine Wagenrennbahn (*circus*) bauen und dem Volke zum Schauspiel öffnen.

#### Fragen und Anregungen

- Interpretieren Sie den Charakter des merowingischen Königtums anhand der Quellenstelle. Erläutern Sie, welche Rolle die unterschiedlichen Übersetzungen für die Interpretation spielen.

---

<sup>1</sup> Gregors von Tours, Libri historiarum X, in: Gregorii Turonensis Opera. Teil 1: Libri historiarum X, hg. von Bruno Krusch/Wilhelm Levison (SS rer. Merov. 1,1), Hannover 1937, S. 1–537, hier l. V, c. 17, S. 216 [Link]: *Quod ille dispiciens, apud Sessionas atque Parisius circus aedificare praecepit, eosque populis spectaculum praebens.*

- Ordnen Sie die Quelle in den Kontext des Kapitels und des Werks Gregors von Tours ein.
- Vergleichen Sie Ihre Interpretation mit denen der älteren und jüngeren Forschung und diskutieren Sie die unterschiedlichen Deutungen.

### Lektüreempfehlungen

Jussen, Bernhard, Wie die poströmischen Könige sich in Selbstdarstellung übten, in: Die Macht des Königs. Herrschaft in Europa vom Frühmittelalter bis in die Neuzeit, hg. von Bernhard Jussen, München 2005, S. 14–26, besonders S. 21–24.

Zehn Bücher Fränkischer Geschichte vom Bischof Gregorius von Tours. Bd. 1: Erstes bis sechstes Buch, übers. von Wilhelm Giesebrecht (Geschichtsschreiber der Deutschen Vorzeit 8), 2. Aufl. Leipzig 1878. [[Link](#)]

Gregor von Tours, Zehn Bücher Geschichten. Auf Grund der Übersetzung Wilhelm Giesebrechts neu bearbeitet von Rudolf Buchner (Ausgewählte Quellen zur deutschen Geschichte des Mittelalters 2), 2 Bde., Darmstadt 1955–1956.

Gregor von Tours, Fränkische Geschichte. Nach der Übersetzung von Wilhelm von Giesebrecht neu bearbeitet von Manfred Gebauer, 3 Bde., Essen/Stuttgart 1988.

### 3.2 Die Grabbeigaben Childerichs I.

Das Grab Childerichs I. wurden 1653 gefunden und zwei Jahre später von Jean-Jacques Chifflet ausführlich beschrieben, inklusive Abbildungen der Grabbeigaben. Heute sind nur noch wenige Originale erhalten.

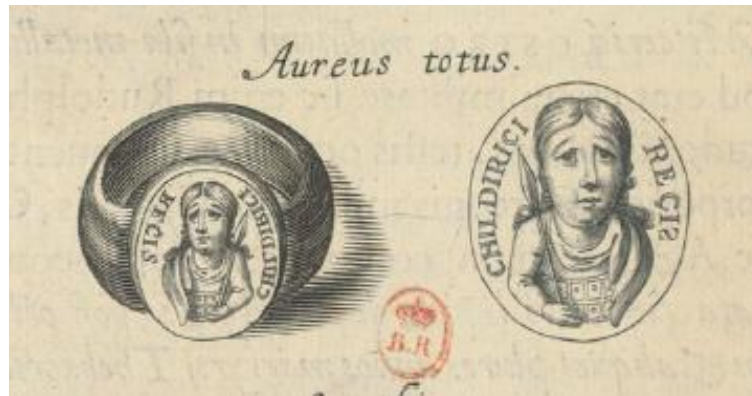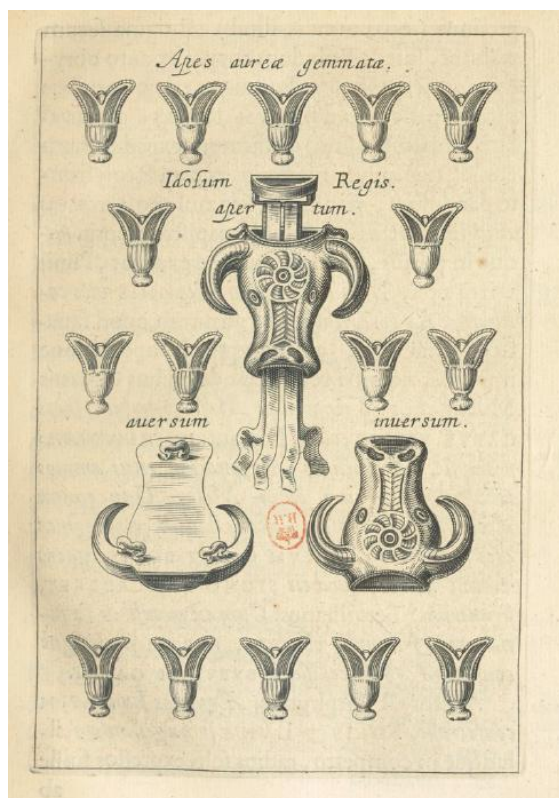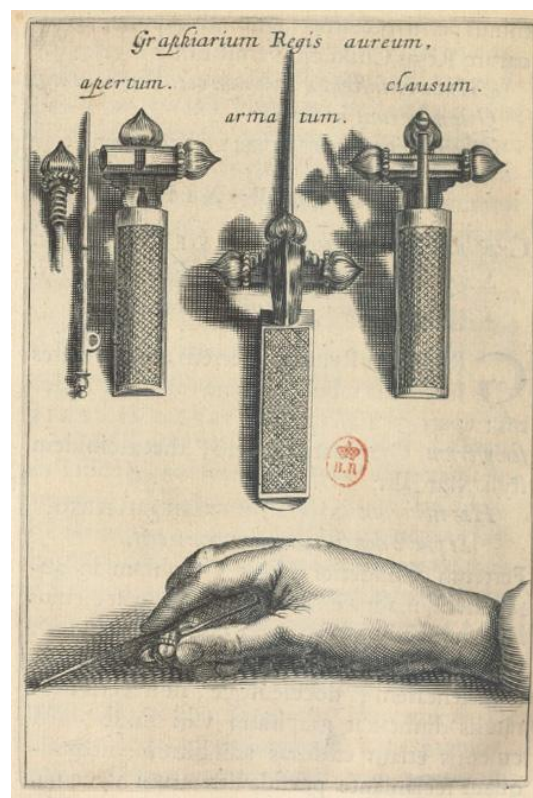



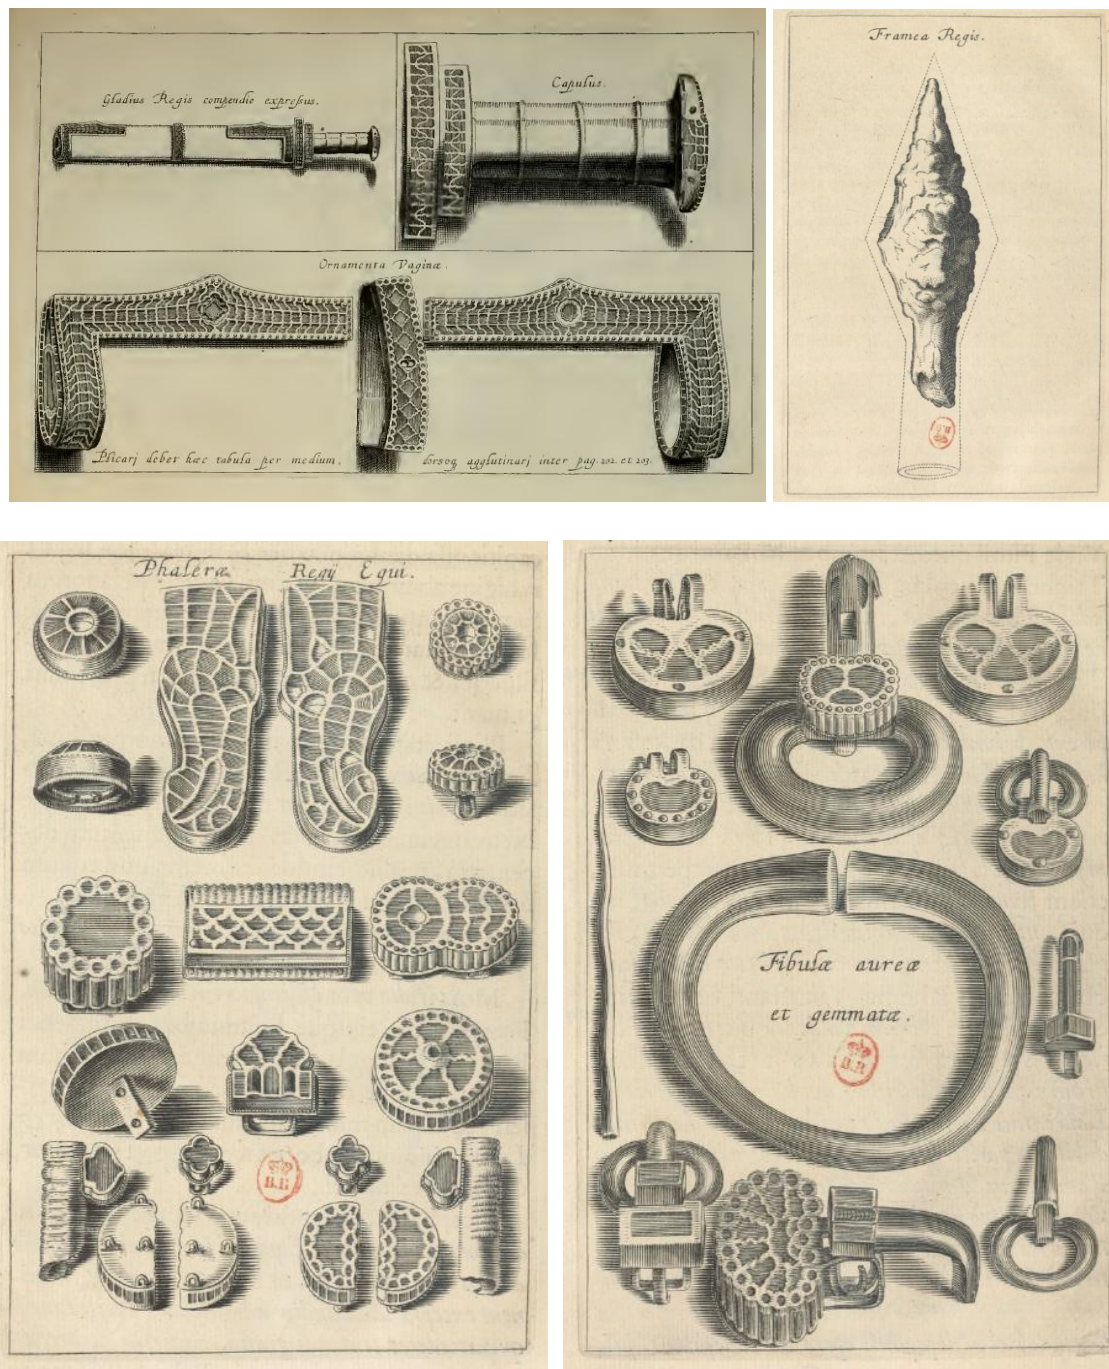

Abbildungen: Jean-Jacques Chifflet, *Anastasis Childerici I. Francorum regis, sive thesaurus sepulchralis Tornaci Neruiorum effusus, & commentario illustratus*, Antwerpen 1655, S. 96, 141, 182, zwischen 202/203, 218, 226, 236. [\[Link 1\]](#) [\[Link 2\]](#) [\[Link 3\]](#)

Erhaltene Originale: Bibliothèque nationale de France, Schlagwort „Tombe de Childéric“ [\[Link\]](#)

## Fragen und Anregungen

- Beschreiben Sie die Grabbeigaben Childerichs und charakterisieren Sie ihre Zusammensetzung und Gestaltung insgesamt.
- Erläutern Sie, welche Unterschiede in Beschreibung und Bewertung sich beim Vergleich des Drucks von 1655 und der erhaltenen Originale ergeben.
- Erörtern Sie, welches Bild des frühen merowingischen Königtums sich aus den Grabbeigaben ergibt.
- Diskutieren Sie die unterschiedlichen Deutungen und Schwerpunkte der Forschung. Verorten Sie diese im größeren Kontext der wissenschaftlichen Beschäftigung mit den Merowingern.

## Lektüreempfehlungen

Berndt, Guido M., Der Rex Francorum Childerich, die Umstrukturierung der Macht in Gallien und ein Grab in Tournai – Indizien für einen Wechsel der Religion?, in: Wechsel der Religionen – Religion des Wechsels. Tagungsbeiträge der Arbeitsgemeinschaft Spätantike und Frühmittelalter. 5. Religion im archäologischen Befund (Nürnberg, 27.–28. Mai 2010), hg. von Niklot Krohn/Sebastian Ristow (Studien zu Spätantike und Frühmittelalter 4), Hamburg 2012, S. 167–192.

Kaiser, Reinhold, Das römische Erbe und das Merowingerreich (Enzyklopädie deutscher Geschichte 26), 3. Aufl. München 2004, S. 85 f.
