# Supplementary material
Source: publisher site journal article supplement (https://www.degruyterbrill.com/publication/isbn/9783110442656/downloadAsset/9783110442656_Buettner%20Koenigsherrschaft.zip)
Supplement: Supplementary file 9 [file mark_splm_9783110442649_Buttner Konigsherrschaft Kap. 4 Herrscher- und Herrschaftsideal.pdf › mark_splm_9783110442649_Buttner Konigsherrschaft Kap. 4 Herrscher- und Herrschaftsideal.pdf]

## 4 Herrscher- und Herrschaftsideal – Zusatzmaterial

### 4.1 Heinrich VII. als idealer König

Johannes von Winterthur (gest. nach 1348) beschreibt in seiner Chronik König Heinrich VII. anlässlich dessen Todes:<sup>1</sup>

Er war die Regel der Gerechtigkeit, die Summe des Gesetzes, das Licht der Kirche, die unerschütterliche Säule des Glaubens, das Schweigen der Überheblichen, die Feile der Besserung, der vorzügliche Eiferer der Wahrheit, treu im Anvertrauten, beständig im Versprochenen, ein eifriger Liebhaber der Verehrung, die Richtschnur der Mäßigung, der Spiegel der Keuschheit, das Vorbild der Freigebigkeit, die Gestalt der Gerechtigkeit, der Verteidiger und Beschützer der Armen, ein ausgezeichnete Nachahmer der evangelischen Lehre.

#### Fragen und Anregungen

- Erläutern Sie die Darstellung Heinrichs VII. und die von Johannes von Winterthur gesetzten Schwerpunkte.
- Vergleichen Sie die Darstellung der Chronik mit der Wahlanzeige und erarbeiten Sie Unterschiede und Gemeinsamkeiten.
- Diskutieren Sie, ob in solchen Darstellungen die individuelle Herrscherpersönlichkeit oder ein abstraktes Ideal fassbar wird.

---

<sup>1</sup> Die Chronik Johannis von Winterthur, hg. von Friedrich Baethgen (MGH SS rer. Germ. NS 3), Berlin 1924, S. 64: *Hic erat regula iusticie, summa legis, lux ecclesie, fidei immobilis columpna, insolencium silencium, lima correctionis, zelator precipuus veritatis, fidelis in commissis, constans in promissis, amator sedulus latrerie, norma temperancie, castitatis speculum, liberalitatis exemplum, forma iusticie, defensor et patronus pauperum, immitator egregius ewangelice doctrine.* [[Link](#)]

## **4.2 Königliche Freigebigkeit oder Sklave der Fürsten? Der Herrschaftsbeginn Friedrichs II. in Deutschland (1212)**

- Vgl. Zusatzmaterial zu Kapitel 2.

### 4.3 Die drei Staatsformen des Aristoteles in mittelalterlicher Darstellung

In einer französischen Übersetzung der „Politik“ des griechischen Philosophen Aristoteles aus dem späten 14. Jahrhundert sind die Staatsformen in ihrer guten (Monarchie, Aristokratie, Politie) und schlechten (Tyrannis, Oligarchie und Demokratie) Ausprägung dargestellt. Die Darstellung befindet sich in einer Handschrift, die der Gelehrte Nikolaus von Oresme dem Herzog von Burgund widmete. Sie bildet den Auftakt des Gesamtwerks, was die Bedeutung verdeutlicht, die man diesem Aspekt der aristotelischen Lehre zumaß.

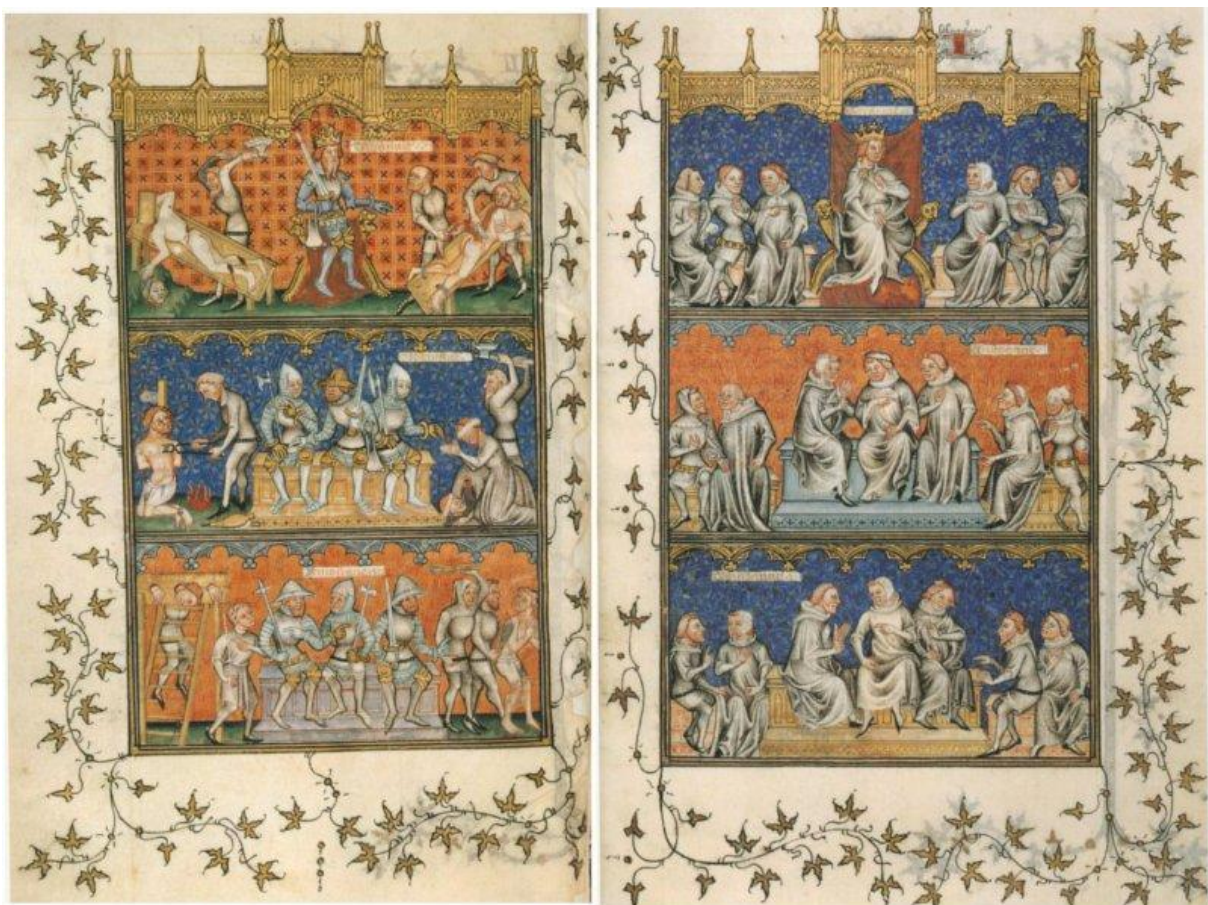

Abbildung: Staatsformen nach Aristoteles in ihrer guten (rechts) und schlechten (links) Ausprägung (um 1375). Französische Übersetzung der „Politik“ durch Nikolaus von Oresme; Brüssel, Bibliothèque Royale Albert Ier, ms. 11201-02, f. 2r. [\[Link\]](#)

## Fragen und Anregungen

- Beschreiben Sie die Darstellung und erörtern Sie die Konzeption von Herrschaft und Monarchie, die in ihr zum Ausdruck kommt.
- Informieren Sie sich über das Verständnis und die Bewertung der Staatsformen bei Aristoteles und vergleichen Sie dies mit der mittelalterlichen Darstellung.

## Lektüreempfehlungen

Marmursztejn, Elsa, Nicole Oresme et la vulgarisation de la Politique d'Aristote au XIV siècle, in: *Thinking Politics in the Vernacular: From the Middle Ages to the Renaissance*, hg. von Gianluca Briguglia (Dokimion 36), Fribourg 2011, S. 103–128.

Sherman, Claire Richter, Some Visual Definitions in the Illustrations of Aristotle's *Nicomachean Ethics* and *Politics* in the French Translations of Nicole Oresme, in: *The Art Bulletin* 59, 1977, S. 320–330.

Sherman, Claire Richter, *Imaging Aristotle. Verbal and Visual Representation in Fourteenth-Century France*, Berkeley/Los Angeles/London 1995, S. 321–326.

#### 4.4 Die ideale Königin – Gisela in der Darstellung Wipos

Der Chronist Wipo widmet sich in den *Gesta Chuonradi imperatoris* nach der Wahl und Weihe König Konrads II. dessen Hof und seinen wichtigsten Ratgebern. Unter diesen hebt er die Königin Gisela besonders hervor:<sup>2</sup>

Sie alle übertraf an Klugheit und Rat Gisela, die geliebte Gemahlin des Königs. Ihr Vater war Herzog Hermann von Schwaben, ihre Mutter Gerberga, eine Tochter König Konrads von Burgund, dessen Vorfahren aus dem Geschlechte Karls des Großen hervorgegangen waren. Darüber hat einer der Unseren im Büchlein, das er ‚Tetralog‘ nannte und später König Heinrich III., als dieser das Geburtsfest des Herrn in der Stadt Straßburg feierte, überreichte, unter anderem die folgenden beiden Verse geschrieben: ‚Wenn du seit Karl dem Großen 14 Geschlechter zählst, erscheint die kluge Frau Gisela.‘

Obwohl sie von so hohem Adel und solch erlesener Schönheit war, war sie frei von jeder Überheblichkeit: im Dienst Gottes war sie ehrfürchtig, in Gebeten und Almosengeben fleißig, und zwar so unauffällig wie sie konnte, so dass sie jene Worte des Evangeliums beachtete, ihre Gerechtigkeit nicht vor den Menschen auszuüben [Mt 6,1]. Sie war nämlich von freigebiger Natur, von herausragender Schlaueit, begierig nach Ruhm statt nach Lob, liebte die Scham, geduldig in weiblicher Arbeit, im Nichtigen keineswegs verschwenderisch, in ehrlichen und förderlichen Dingen überaus freigebig, reich an Landgütern und erfahren in der Handhabung der höchsten Würden.

Durch die Missgunst gewisser Leute, die ja oft wie Rauch von den Unteren zu den höheren aufsteigt, wurde sie von ihrer Weihe für einige Tage abgehalten. Übrigens ist auch heute noch fraglich, ob sie diesen Widerwillen berechtigt oder unberechtigt ertrug. Aber die männliche Rechtschaffenheit siegte in der Frau, und mit der Zustimmung und auf Bitten der Fürsten geweiht stand sie dem König als unentbehrliche Begleitung zur Seite. Diese Dinge über die Königin habe

---

<sup>2</sup> Wipo, *Gesta Chuonradi imperatoris*, in: Die Werke Wipos, hg. von Harry Bresslau (MGH SS rer. Germ. [61]), 3. Aufl. Hannover/Leipzig 1915, S. 3–62, hier c. 4, S. 24–26 [\[Link\]](#): *Super hos omnes dilecta regis coniunx Gisela prudentia et consilio vigit. Cui pater erat Herimannus dux Alamanniae, mater eius Kerbirga filia Chuonradi regis de Burgundia fuit, cuius parentes de Caroli Magni stirpe processerant. Unde quidam de nostris in libello quem Tetralogum nominavit et postea regi Heinricho tertio, cum natalem Domini in Argentina civitate celebraret, praesentavit, inter alios duos versus edidit hoc modo: ‚Quando post decimam numeratur linea quarta, De Carolo Magno procedit a Gisela prudens.‘ Cum tantae nobilitatis esset et formae decentissimae, minimae extollentiae fuit: in Dei servitio timorata, in orationibus et elemosinis assidua et hoc, ut secretius potuit, attendens illud euangelicum, ne iustitiam suam faceret coram hominibus. Erat enim liberalis ingenii, illustris sollertiae, avida gloriae, non laudis, pudoris amans, feminei laboris patiens, in cassum minime profusa, in rebus honestis et utilibus abunde larga, dives in praediis, summos honores bene tractare perita. Haec quorundam hominum invidia, quae saepe ab inferioribus fumigat ad superiores, per aliquot dies a consecratione sua impediabatur. Caeterum, si illud odium iuste an iniuste pertulerit, adhuc in quaestione moratur; tamen virilis probitas in femina vicit, et ex consensu et petitione principum consecrata necessaria comes regem sequebatur. Haec de regina interim breviavi intermissis regalibus gestis; nunc ad eadem revertar.*

ich einstweilen kurz zwischen den Taten des Königs berichtet; nun kehre ich zu diesem zurück.

### Fragen und Anregungen

- Nennen Sie die wichtigsten Eigenschaften Königin Giselas und strukturieren Sie diese.
- Vergleichen Sie die Darstellung mit derjenigen Konrads II. anlässlich seiner Weihe sowie mit dem Herrscherideal insgesamt. Erklären Sie die Unterschiede zwischen den an König und Königin gestellten Anforderungen.
- Diskutieren Sie die Aussagen Wipos vor dem Hintergrund seiner Stellung am Hof und dem Entstehungskontext des Werks. Informieren Sie sich über die Vorwürfe gegen Gisela und erläutern Sie Wipos Umgang mit diesen.

### Lektüreempfehlungen

Erkens, Franz-Reiner, Konrad II. (um 990–1039). Herrschaft und Reich des ersten Salierkaisers, Regensburg 1998, S. 50–55.

Körntgen, Ludger, Gisela, in: Die Kaiserinnen des Mittelalters, hg. von Amalie Föbel, Regensburg 2011, S. 100–122, hier S. 100–108.

Wipo, Gesta Chuonradi imperatoris, [http://www.geschichtsquellen.de/repOpus\\_04656.html](http://www.geschichtsquellen.de/repOpus_04656.html) (letzter Zugriff: 01.10.2017).

Wolfram, Herwig, Konrad II. 990–1039. Kaiser dreier Reiche, München 2000, S. 49–68.
