# Supplementary material
Source: publisher site journal article supplement (https://www.degruyterbrill.com/publication/isbn/9783110442656/downloadAsset/9783110442656_Buettner%20Koenigsherrschaft.zip)
Supplement: Supplementary file 10 [file mark_splm_9783110442649_Buttner Konigsherrschaft Kap. 5 Herrschaft als Aushandlungsprozess.pdf › mark_splm_9783110442649_Buttner Konigsherrschaft Kap. 5 Herrschaft als Aushandlungsprozess.pdf]

## 5 Herrschaft als Aushandlungsprozess – Zusatzmaterial

### 5.1 Der Traum Heinrichs I. von England (1130)

Die Chronik Johannis von Worcester, die von den Alpträumen Heinrichs I. von England berichtet, enthält außergewöhnliche Illustrationen, wobei die Zeichnungen offenbar dem Text vorausgingen. Sie zeigen die drei an den König herantretenden Stände und das in Seenot geratene Schiff. Links wird der königliche Arzt Grimbald dargestellt, dem der Bericht über den Traum zugeschrieben wird.

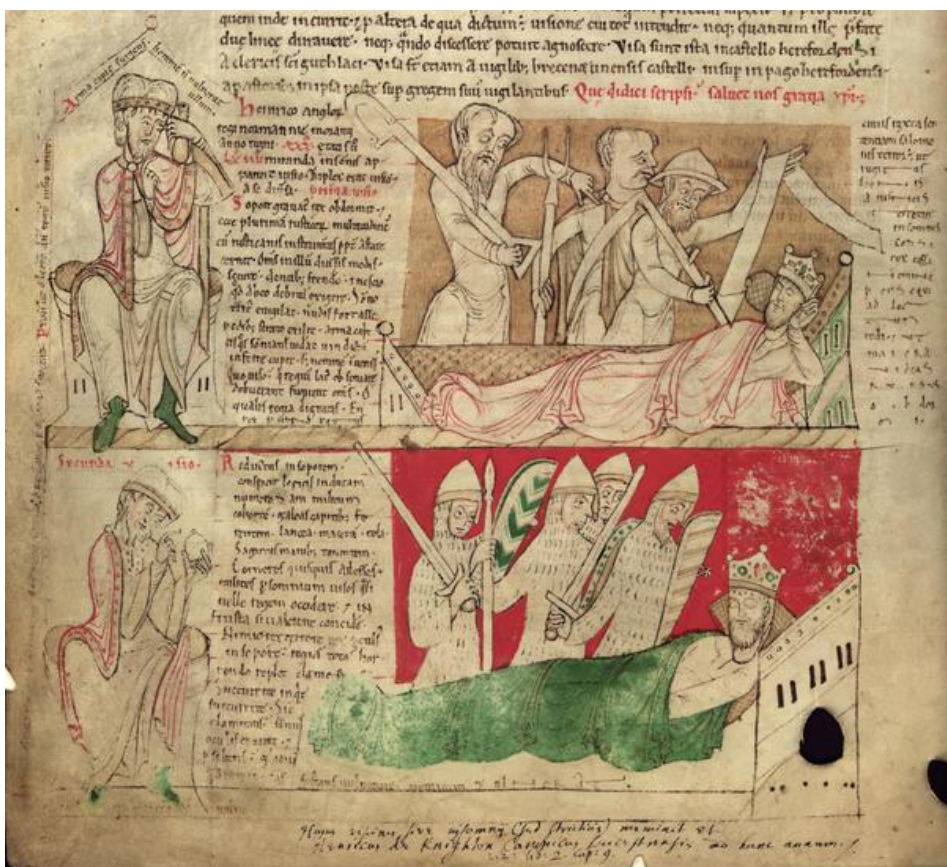

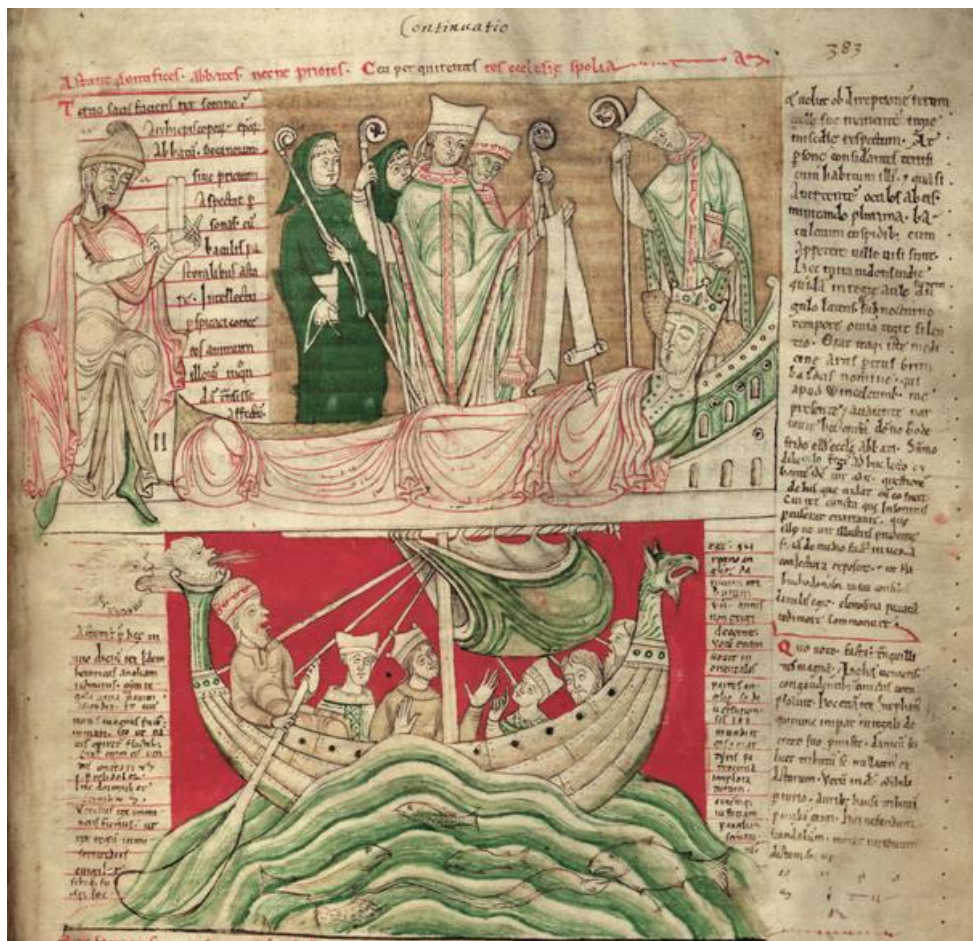

Abbildungen: Der Alptraum Heinrichs I. von England in der Chronik des Johann von Worcester (um 1140); Corpus Christi College Oxford, MS 157, f. 382–383. [Links: [f. 382](#), [f. 383](#), [gesamte Handschrift](#)]

## Fragen und Anregungen

- Beschreiben Sie die Darstellung und analysieren Sie ihre Aussage.
- Erläutern Sie das Verhältnis zwischen den dargestellten Ständen und dem König sowie ihre Rolle für die Ausübung seiner Herrschaft.

## Lektüreempfehlungen

Blyth, Julie, The illustrations in John of Worcester's *Chronicle of England* (CCC MS 157), URL: <http://www.ccc.ox.ac.uk/The-Chronicle-of-John-of-Worcester/> (letzter Zugriff: 1.10.2017).

Collard, Judith, Henry I's dream in John of Worcester's Chronicle (Oxford, Corpus Christi College, MS 157) and the illustration of twelfth-century English chronicles, in: *Journal of Medieval History* 36, 2010, S. 105–125.

McGurck, Patrick, Illustrations in the Chronicle of John of Worcester, in: *Source: Notes in the History of Art* 33, 2014, S. 28–33.

## **5.2 Die Fürstenprivilegien Friedrichs II. (1220, 1232)**

- Vgl. Zusatzmaterial zu Kapitel 9.

## **5.3 Die Absetzung Ludwigs des Frommen (833)**

- Vgl. Zusatzmaterial zu Kapitel 6.

## 5.4 Die Absetzung Friedrichs II. durch Papst Innozenz IV. (1245)

Adam Usk verweist in seinem Bericht über die Absetzung Richards II. von England (1399) auf den Liber Sextus, konkret auf die Dekretale zur Absetzung Friedrichs II. aus dem Jahr 1245 (l. II, tit. XIV, c. 2).

Fassung des Corpus Iuris Canonici:

Corpus Iuris Canonici, hg. von Emil Friedberg, 2 Bde., Leipzig 1879–1881 (ND Graz 1959), hier Bd. 2, S. 959f. [\[Link\]](#)

Edition der Absetzungsbulle vom 17. Juli 1245:

MGH Constitutiones et acta publica imperatorum et regum, Bd. 2: 1198–1272, hg. von Ludwig Weiland, Hannover 1906, Nr. 400, S. 508–512. [\[Link\]](#)

Deutsche Übersetzung, mit lateinischem Original:

Konzilien des Mittelalters. Vom ersten Laterankonzil (1123) bis zum fünften Laterankonzil (1512–1517) (Conciliorum oecumenicorum decreta 2), hg. von Josef Wohlmuth, Paderborn et al. 2000, S. 278–283.

### Fragen und Anregungen

- Erläutern Sie den Zweck des Verweises auf die entsprechende Stelle im kanonischen Recht.
- Geben Sie die Vorgeschichte und die Gründe wieder, die in der Absetzungsbulle ausgeführt werden.
- Erläutern Sie die päpstliche Begründung des von ihm beanspruchten Rechts auf Absetzung eines Monarchen.
- Verorten Sie die Absetzung Friedrichs II. im historischen Kontext und diskutieren Sie die Bedeutung der verschiedenen Motive und Gründe.

### Lektüreempfehlungen

Schubert, Ernst, Königsabsetzung im deutschen Mittelalter. Eine Studie zum Werden der Reichsverfassung (Abhandlungen der Akademie der Wissenschaften zu Göttingen. Philologisch-Historische Klasse. Dritte Folge 267), Göttingen 2005, S. 217–228.

Stürner, Wolfgang, Friedrich II. 1194–1250, 2 Bde., 3. Aufl. Darmstadt 2009, Bd. 2, S. 533–539.



## 5.5 Die Absetzung Richards II. von England (1399) und Wenzels (1400) im Spiegel der Quellen

Die Absetzung Richards II. wurde in den „Rolls of Parliament“ ausführlich beschrieben und begründet.

Quellen:

Select Documents of English Constitutional History. 1307–1485, hg. von Stanley B. Chrimes/Alfred L. Brown, London 1961, Nr. 166, S. 184–193 [*mit Auslassungen*].

The Deposition of Richard II. ‘The Record and Process of the Renunciation and Deposition of Richard II’ (1399) and Related Writings, hg. von David R. Carlson (Toronto Medieval Latin Texts 29), Toronto 2007, S. 23–65 [*vollständig*].

Englische (Teil-)Übersetzung:

Wilkinson, Bertie, Constitutional History of Medieval England 1216–1399, 3 Bde., London/New York/Toronto 1948–1958, Bd. 2, S. 311–318.

Für die Absetzung Wenzels existieren mehrere Berichte über den Vorgang und die von den Kurfürsten angeführten Gründe.

Quellen:

Deutsche Reichstagsakten unter König Wenzel. Dritte Abtheilung 1397–1400, hg. von Julius Weizsäcker (Deutsche Reichstagsakten 3), München 1877, Nr. 212–218, S. 271–278, dazu die Übersicht S. 230–233. [[Link](#)]

### Fragen und Anregungen

- Beschreiben Sie Darstellung in den Quellen und bestimmen Sie die Quellengattung, ebenso wie für die in Kapitel 5.4.2 und 5.4.3 abgedruckten Quellen.
- Erläutern Sie Gemeinsamkeiten und Unterschiede innerhalb der Überlieferung der jeweiligen Absetzung sowie im Vergleich der beiden.
- Diskutieren Sie, ob die Begründungen der Absetzung tatsächliche Fehler und Vergehen des Herrschers widerspiegeln.

## Lektüreempfehlungen

Fletcher, Christopher, Narrative and political strategies at the deposition of Richard II, in: *Journal of Medieval History* 30, 2004, S. 323–341.

Rexroth, Frank, Um 1399 – Wie man einen König absetzte, in: *Die Macht des Königs. Herrschaft in Europa vom Frühmittelalter bis in die Neuzeit*, hg. von Bernhard Jussen, München 2005, S. 241–254, 393–394.

Schubert, Ernst, Königsabsetzung im deutschen Mittelalter. Eine Studie zum Werden der Reichsverfassung (Abhandlungen der Akademie der Wissenschaften zu Göttingen. Philologisch-Historische Klasse. Dritte Folge 267), Göttingen 2005, S. 362–403.
