# Supplementary material
Source: publisher site journal article supplement (https://www.degruyterbrill.com/publication/isbn/9783110442656/downloadAsset/9783110442656_Buettner%20Koenigsherrschaft.zip)
Supplement: Supplementary file 11 [file mark_splm_9783110442649_Buttner Konigsherrschaft Kap. 6 Mit- und Gegenspieler koniglicher Herrschaft.pdf › mark_splm_9783110442649_Buttner Konigsherrschaft Kap. 6 Mit- und Gegenspieler koniglicher Herrschaft.pdf]

## 6 Mit- und Gegenspieler königlicher Herrschaft – Zusatzmaterial

### 6.1 Die Entmachtung Ludwigs des Frommen durch seine Söhne aus erster Ehe (833)

Der Versuch Ludwigs des Frommen, die bestehende Nachfolgeordnung zugunsten seines Sohns Karl aus seiner zweiten Ehe mit Judith zu ändern, führte zum Aufstand der übrigen Söhne und zur zeitweiligen Absetzung des Kaisers.

Quellen:

*Annales Bertiniani*, hrsg. von Georg Waitz (MGH SS rer. Germ. [5]), Hannover 1883, ad annum 833, S. 5–7. [\[Link\]](#)

Astronomus, *Vita Hludowici imperatoris*, hg. von Ernst Tresp, in: Thegan. *Die Taten Kaiser Ludwigs – Astronomus, Das Leben Kaiser Ludwigs* (MGH SS rer. Germ. 64), Hannover 1995, S. 279–555, hier c. 48 f., S. 472–484. [\[Link\]](#)

*Capitularia regum Francorum*, Bd. 2, hg. von Alfred Boretius/Victor Krause (MGH Capit. 2), Hannover 1890, Nr. 197, S. 51–55. [\[Link\]](#)

= Booker, Courtney M., *The Public Penance of Louis the Pious: A New Edition of the *Episcoporum de poenitentia, quam Hludowicus imperator professus est, relatio Compendiensis* (833)*, in: *Viator. Medieval and Renaissance Studies* 39, 2008, S. 1–19, hier S. 10–19.

Thegan, *Gesta Hludowici imperatoris*, hg. von Ernst Tresp, in: Thegan. *Die Taten Kaiser Ludwigs – Astronomus, Das Leben Kaiser Ludwigs* (MGH SS rer. Germ. 64), Hannover 1995, S. 167–277, hier c. 42–44, S. 228–239. [\[Link\]](#)

Übersetzung:

*Annales Bertiniani*: Quellen zur karolingischen Reichsgeschichte. Zweiter Teil: Jahrbücher von St. Bertin. Jahrbücher von St. Vaast. Xantener Jahrbücher, hg. von Reinhold Rau (Ausgewählte Quellen zur deutschen Geschichte des Mittelalters. Freiherr vom Stein-Gedächtnisausgabe 6), Darmstadt 1958, S. 19–23.

*Astronomus*: s. o., parallel zum lateinischen Text.

*Capitularia regum Francorum*: s. u. Booker 2009, S. 257–264 [Englisch].

*Thegan*: s. o., parallel zum lateinischen Text.

*Zusammenstellung (in Auszügen)*: Deutsche Geschichte in Quellen und Darstellungen. Bd. 1: Frühes und hohes Mittelalter. 750–1250, hg. von Wilfried Hartmann (Reclams Universal-Bibliothek 17001), Stuttgart 1995, Nr. 17.1–17.4, S. 89–97.

### **Fragen und Anregungen**

- Arbeiten Sie die zentralen Mit- und Gegenspieler königlicher Herrschaft heraus und beschreiben Sie deren Rolle und Bedeutung für die Ausübung königlicher Herrschaft.
- Vergleichen Sie die diesbezüglichen Aussagen der Quellen und analysieren Sie die jeweilige Schwerpunktsetzung.
- Arbeiten Sie die Verfehlungen heraus, die dem Kaiser zur Last gelegt wurden, und vergleichen Sie diese mit den Vorwürfen bei anderen Absetzungen (Kapitel 5).

### **Lektüreempfehlungen**

Boshof, Egon, Ludwig der Fromme (Gestalten des Mittelalters und der Renaissance), Darmstadt 1996, S. 192–213.

Booker, Courtney M., Past Convictions. The Penance of Louis the Pious and the Decline of the Carolingians, (The Middle Ages Series), Philadelphia 2009.

Jong, Mayke de, Power and humility in Carolingian society: the public penance of Louis the Pious, in: Early Medieval Europe 1, 1992, S. 29–52. [[Link](#)]

## 6.2 Der Kampf um Regentschaft nach dem Tod Ottos II. (983)

Die Annales Quedlinburgenses berichten zu 984 und 985 über den Kampf um die Regentschaft für Otto III., den minderjährigen Sohn des 983 verstorbenen Kaisers Otto II.:<sup>1</sup>

984. Der junge Sohn des Kaisers, Otto III., wurde durch die Salbung des Erzbischofs Johannes von Ravenna in Aachen am Tag der Geburt des Herrn zum König gesalbt. Aber der einstige Herzog Heinrich, der aus der Verbannung zurückgekommen war, sobald er den Tod des Kaisers vernommen hatte, drang darnach mit seinen Anhängern in die Stadt Köln ein und hielt den König fest, indem er zunächst vorgab, er wolle nach dem Rechte der Verwandtschaft die Sache des königlichen Kindes überaus treu verteidigen; dann aber, angetrieben durch den Stachel wachsender Habsucht und auch durch die schlechte Überredung einiger verführt, riss er gewaltsam die Herrschaft an sich (*regnum tyrannice invasit*) und ging in seiner Selbstüberhebung so weit, dass er begehrte, König genannt und zum König geweiht zu werden. König genannt zu werden erreichte er aber bei wenigen, doch zum König geweiht zu werden gelang ihm nicht, denn Gott und der Eifer der Getreuen, die ihm nicht beistimmten, sondern dem erwählten und gesalbten König rechtmäßig anhängen, verhinderten es.

Inzwischen hatten diejenigen, welche die Partei des Königs unterstützten, sich gegenseitig mit einem Eide verbunden, fest darin zu beharren, und bewährte Boten an die Großmutter des Königs, die erhabene Kaiserin Adelheid, in die Lombardei gesandt, um ihr den Hergang dieser Verwirrung anzuzeigen; sie baten sie sehr, wenn ihr des Reichs und Enkels Wohl am Herzen läge, ihnen mit der Macht ihrer Anwesenheit und ihres Rates schnell zu Hilfe zu kommen. Nachdem diese sich zuerst des göttlichen Beistandes versichert hatte, beschleunigte sie ihre Reise mit ihrer Schwiegertochter, der Kaiserin Theophanu, der Mutter des Königs, und mit ihrer Tochter, der erlauchten Äbtissin Mathilde, der Tante des königlichen Kindes, begleitet von ihrem Bruder Konrad, dem König von Burgund, und dem gleichnamigen Frankenherzog und den Obersten aus ganz Italien, Gallien, Schwaben, Franken und Lotharingen; auch die Sachsen, Thüringer und Schwaben mit allen ihren Fürsten zogen ihr zu und sie versammelten sich in Rohr [bei Meiningen], einmütig bereit für den König entweder getreu zu sterben oder, was Gott sei Dank geschah, zu siegen. Denn als daselbst eine große Beratung abgehalten wurde, da strahlte zum Erstaunen aller, die anwesend waren und es sahen, ein Stern glänzenden Lichts im Kampf der Parteien mitten im Himmelsraum, in ganz ungewohnter Weise mitten am Tage, gleichsam als wollte er dem gefangenen Könige die Hilfe Gottes gewähren, ein wunderbares und den Nachkommen denkwürdiges Zeichen. Durch diesen Anblick erschreckt wich bald darauf die ungerechte Partei, und der genannte Heinrich, des angenomme-

---

<sup>1</sup> Die Annales Quedlinburgenses, hg. von Martina Giese (MGH SS rer. Germ. 72), Hannover 2004, S. 470–475. [\[Link\]](#). Übersetzung in Anlehnung an: Die Jahrbücher von Quedlinburg, übers. von Eduard Winkelmann, neu bearb. von Wilhelm Wattenbach (Geschichtsschreiber der deutschen Vorzeit 36), 3. Aufl. Leipzig 1941, S. 3–6. [\[Link\]](#)

nen Namens und Königtums rechtmäßig beraubt, wurde gezwungen, den König der Großmutter, Mutter und Tante zu übergeben, und auf Verwendung seines Schwagers des Königs Konrad und der Fürsten mit einiger Gnade bedacht, zog er traurig in Richtung seiner Heimat. Nachdem sie also das wertvolle Pfand erhalten hatten, gingen die genannten kaiserlichen Frauen nach Sachsen, und als sie alle zunächst zu der schon oft genannten Stadt kamen, die hoch auf dem Gipfel des Quedlingburger Bergs liegt, wurden sie mit süßtönenden Lobgesängen von dem doppelten Zug der Geistlichkeit mit dem Volk und den Jungfrauen, welche dort Christus dienen, auf das Freudigste empfangen und herzlich und mit Freuden beglückwünscht, sowohl wegen der ersehnten Ankunft der geistlichen Mutter als auch wegen des siegreichen Ausgangs mit dem König. Den Rest ihres Wegs zogen sie unter den größten Ehren.

985. [...] Als das königliche Kind Otto III. nach Frankfurt kam, da kam auch er [Heinrich] dorthin und erniedrigte sich rechtmäßig, um der Strafe für seine ungerichte Erhebung zu entgehen; demütig in Aufzug und Haltung, beide Hände gefaltet, errötete er nicht, sich vor den Augen der gesamten Menge und in Gegenwart der kaiserlichen Frauen, welche die Regierung besorgten (*quas regni cura penes erat*), der Großmutter, Mutter und Tante des Kindes, als Soldat (*miles*) und in der wahren Treue zum zu leistenden Kriegsdienst dem königlichen Knaben zu übergeben, den er als Waise gefangen genommen und dessen Herrschaft er gewaltsam an sich gerissen hatte, nichts für sich fordernd als das Leben, um nichts bittend als um Gnade. Aber die Frauen, durch deren Sorge, wie wir sagten, das Reich und die Jugend des Königs geleitet wurde (*quarum cura regnum regisque regebatur infantia*), nahmen ihn, gar sehr erfreut durch die demütige Unterwerfung (*deditio*) eines so hohen Mannes, mit verdienter Ehre auf – denn das ist die Sitte der Frommen, nichts Böses zu vergelten, sondern sogar für Böses Gutes zu erweisen –, und als er begnadigt und zur herzoglichen Würde wieder erhoben war, waren sie ihm nicht nur als Freunden, sondern als allerengste Freunde in schuldiger Liebe zugetan, wie das Recht der Verwandtschaft es forderte.

## Fragen und Anregungen

- Skizzieren Sie die politische Situation nach dem Tod Ottos II. und benennen Sie die wesentlichen Akteure im Kampf um die Macht.
- Schildern Sie die Leistung der Herrscherinnen im Umfeld des jungen Königs und beurteilen Sie die gefundene Lösung des Konflikts.
- Bewerten Sie die Art der Darstellung, indem Sie sich über den historischen Kontext und den Standpunkt der Quelle informieren.

## Lektüreempfehlungen

Althoff, Gerd, Die Ottonen. Königsherrschaft ohne Staat (Urban-Taschenbücher 473), 2. Aufl. Stuttgart/Berlin/Köln 2005, S. 153–171.

Annales Quedlinburgenses, URL : [http://www.geschichtsquellen.de/repOpus\\_00365.html](http://www.geschichtsquellen.de/repOpus_00365.html) (letzter Zugriff: 1.10.2017).

Fößel, Amalie, Die Königin im mittelalterlichen Reich. Herrschaftsausübung, Herrschaftsrechte, Handlungsspielräume (Mittelalter-Forschungen 4), Stuttgart 2000, S. 319–332.

Offergeld, Thilo, Reges pueri. Das Königtum Minderjähriger im frühen Mittelalter (Monumenta Germaniae Historica Schriften 50), Hannover 2001, S. 658–689.

### 6.3 Eduard III. von England huldigt Philipp VI. von Frankreich in Amiens (1329)

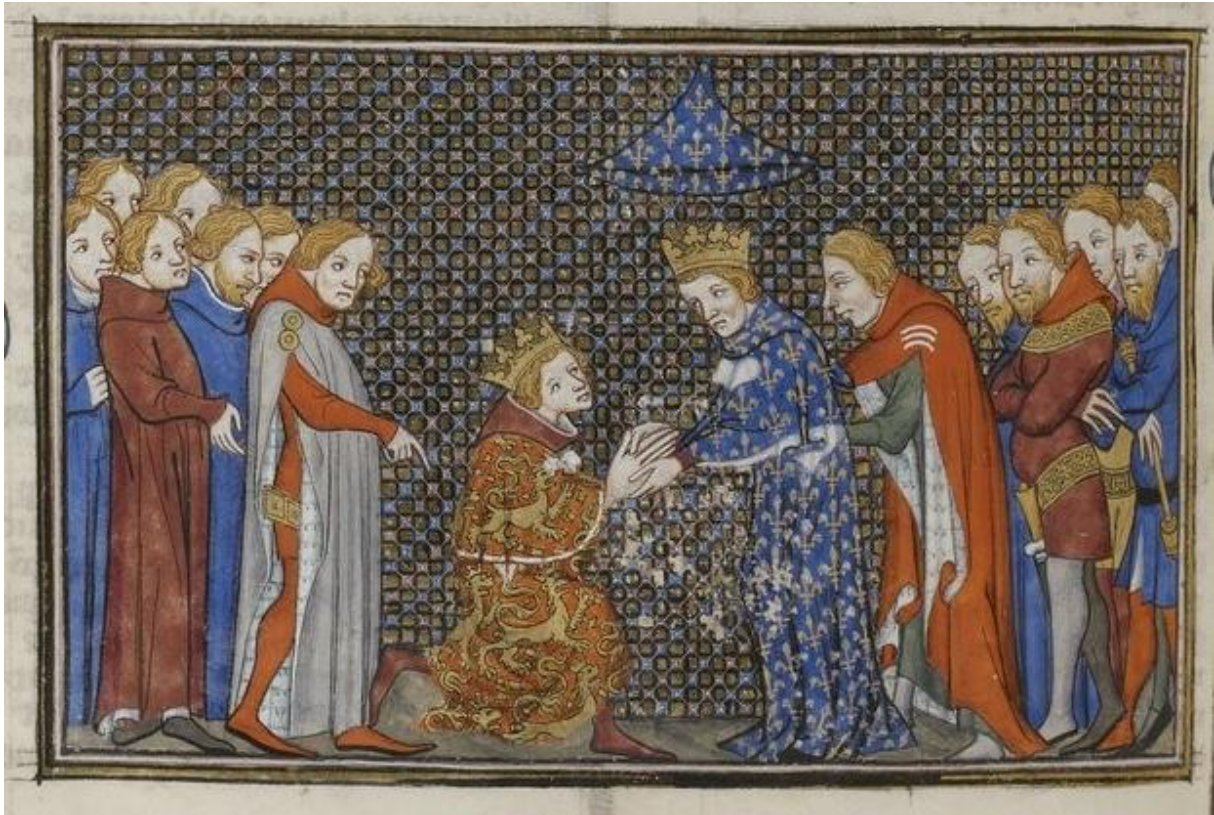

Abbildung: Huldigung Edwards III. von England in den Grands Chroniques de France (um 1379); Paris, Bibliothèque nationale de France, Ms. fr. 2813, fol. 357v.  
[\[Link\]](#) [\[Link Handschrift\]](#)

#### Fragen und Anregungen

- Beschreiben Sie die Darstellung der beiden Könige und analysieren Sie, welche Botschaft in dem französischen Geschichtswerk vermittelt werden sollte.
- Informieren Sie sich über den historischen Kontext des dargestellten Aktes und stellen Sie die Darstellung dem tatsächlichen Geschehen gegenüber.

#### Lektüreempfehlungen

Margue, Michel, Jean de Luxembourg et les rois de France, in: Un itinéraire européen. Jean l'Aveugle, comte de Luxembourg et roi de Bohême 1296–1346, hg. von Michel Margue (Publications du CLUDEM 12), Luxembourg 1996, S. 51–86, hier S. 79.

Studd, Robin, Die eduardische Epoche (1272–1377), in: Die englischen Könige im Mittelalter. Von Wilhelm dem Eroberer bis Richard III., hg. von Natalie Fryde/Hanna Vollrath (Beck'sche Reihe 1534), München 2004, S. 130–149.

Töpfer, Bernhard, Philipp VI. 1328–1350, in: Die französischen Könige des Mittelalters, hg. von Joachim Ehlers/Heribert Müller/Bernd Schneidmüller, München 1996, S. 251–265.
