# Supplementary material
Source: publisher site journal article supplement (https://www.degruyterbrill.com/publication/isbn/9783110442656/downloadAsset/9783110442656_Buettner%20Koenigsherrschaft.zip)
Supplement: Supplementary file 12 [file mark_splm_9783110442649_Buttner Konigsherrschaft Kap. 7 Thronfolge und Konigserhebung.pdf › mark_splm_9783110442649_Buttner Konigsherrschaft Kap. 7 Thronfolge und Konigserhebung.pdf]

## 7 Thronfolge und Königserhebung – Zusatzmaterial

### 7.1 Investiturrituale im Codex Balduini

#### Fragen und Anregungen

- Beschreiben Sie Aufbau und Inhalt des Codex Balduini (Zweites Viertel 14. Jahrhundert) und erläutern Sie, welche Bedeutung der Königserhebung Heinrichs VII. zukommt.

#### Lektüreempfehlungen

Die Virtuelle Ausstellung des Landeshauptarchiv Koblenz, wo sich die Handschrift heute befindet (Bestand 1 C Nr. 1) ist leider (derzeit?) nicht mehr online. Eine ältere Edition der Handschrift mit Farbabbildungen von 1881 ist online frei zugänglich. Daneben finden sich mehrere neuere Editionen.

Die Romfahrt Kaiser Heinrich's VII. im Bildercyclus des Codex Balduini Treverensis, hg. von der Direktion der K. Preuß. Staatsarchive, Berlin 1881. [[Link](#)]

Kaiser Heinrichs Romfahrt. Die Bilderchronik von Kaiser Heinrich VII. und Kurfürst Balduin von Luxemburg 1308–1313 im Landeshauptarchiv Koblenz, hg. von Franz-Josef Heyen, Koblenz 1985. [zuvor 1965, 1978]

Kaiser Heinrichs Romfahrt. Zur Inszenierung von Politik in einer Trierer Bilderhandschrift des 14. Jahrhunderts. Begleitpublikation zur gleichnamigen Ausstellung im Landeshauptarchiv Koblenz, hg. von Wolfgang Schmid (Mittelrheinische Hefte 21), Koblenz 2000.

Der Weg zur Kaiserkrone. Der Romzug Heinrichs VII. in der Darstellung Erzbischofs Balduins von Trier, hg. von Michel Margue et al. (Publications du Centre Luxembourgeois de Documentation et d'Etudes Médiévales (CLUDEM) 24), Trier 2009.

## 7.2 *Divisio regnorum* (806) und *Ordinatio imperii* (817)

Quellen:

Capitularia regum Francorum, Bd. 1, hg. von Alfred Boretius (MGH Capit. 1), Hannover 1883, Nr. 45, S. 126–130; Nr. 136, S. 270–273. [[Link 806](#)] [[Link 817](#)]

Übersetzung:

Geschichte in Quellen. Bd. 2: Mittelalter, hg. von Wolfgang Lautemann, München 1970, Nr. 101, S. 103–106; Nr. 103, S. 107–110.

Deutsche Geschichte in Quellen und Darstellungen. Bd. 1: Frühes und hohes Mittelalter. 750–1250, hg. von Wilfried Hartmann (Reclams Universal-Bibliothek 17001), Stuttgart 1995, Nr. 13, S. 73–78; Nr. 15, S. 82–86. [*nach Lautemann, jedoch mit Kürzungen*]

### Fragen und Anregungen

- Geben Sie den Inhalt der beiden Nachfolgeordnungen wieder und ordnen Sie die zugrundeliegenden Prinzipien in die mittelalterliche Entwicklung der Thronfolge ein.
- Stellen Sie beide Regelungen gegenüber und arbeiten Sie Unterschiede und Gemeinsamkeiten heraus.

### Lektüreempfehlungen

Erkens, Franz-Reiner, *Divisio legitima* und *unitas imperii*. Teilungspraxis und Einheitsstreben bei der Thronfolge im Frankenreich, in: Deutsches Archiv für Erforschung des Mittelalters 52, 1996, S. 423–485.

Hägermann, Dieter, „*Divisio imperii*“ von 817 und „*divisio regni*“ von 831. Überlegungen und Anmerkungen zu „Hausgesetzen“ Karls des Großen und Ludwigs des Frommen, in: Herrscher- und Fürstentestamente im westeuropäischen Mittelalter, hg. von Brigitte Kasten (Norm und Struktur 29), Köln/Weimar/Wien 2008, S. 291–299.

Hägermann, Dieter, Reichseinheit und Reichsteilung. Bemerkungen zur *Divisio regnorum* von 806 und zur *Ordinatio Imperii* von 817, in: *Historisches Jahrbuch* 95, 1975, S. 278–307.

Schieffer, Rudolf, *Die Karolinger* (Kohlhammer-Urban-Taschenbücher 411), 5. Aufl. Stuttgart 2014, S. 106f. und 117f.

Tischler, Matthias M., Die „*Divisio regnorum*“ von 806 zwischen handschriftlicher Überlieferung und historiographischer Rezeption, in: *Herrscher- und Fürstentestamente im westeuropäischen Mittelalter*, hg. von Brigitte Kasten (Norm und Struktur 29), Köln/Weimar/Wien 2008, S. 193–258.

### 7.3 Der Herrschaftsübergang von Heinrich IV. zu Heinrich V. und die Rolle der Reichsinsignien

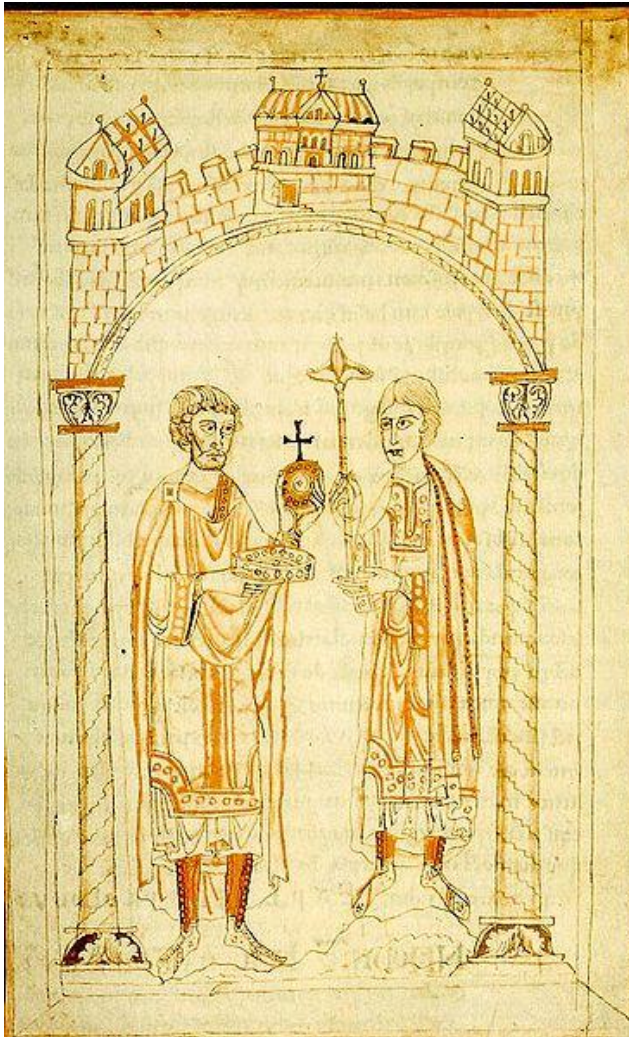

Abbildung 1: Heinrich IV. übergibt seinem Sohn Heinrich V. die Reichsinsignien. Darstellung in der Chronik Ekkehards von Aura (1106/16/25); Berlin, Staatsbibliothek, Ms. lat. fol. 295, f. 99r. [[Link](#)]

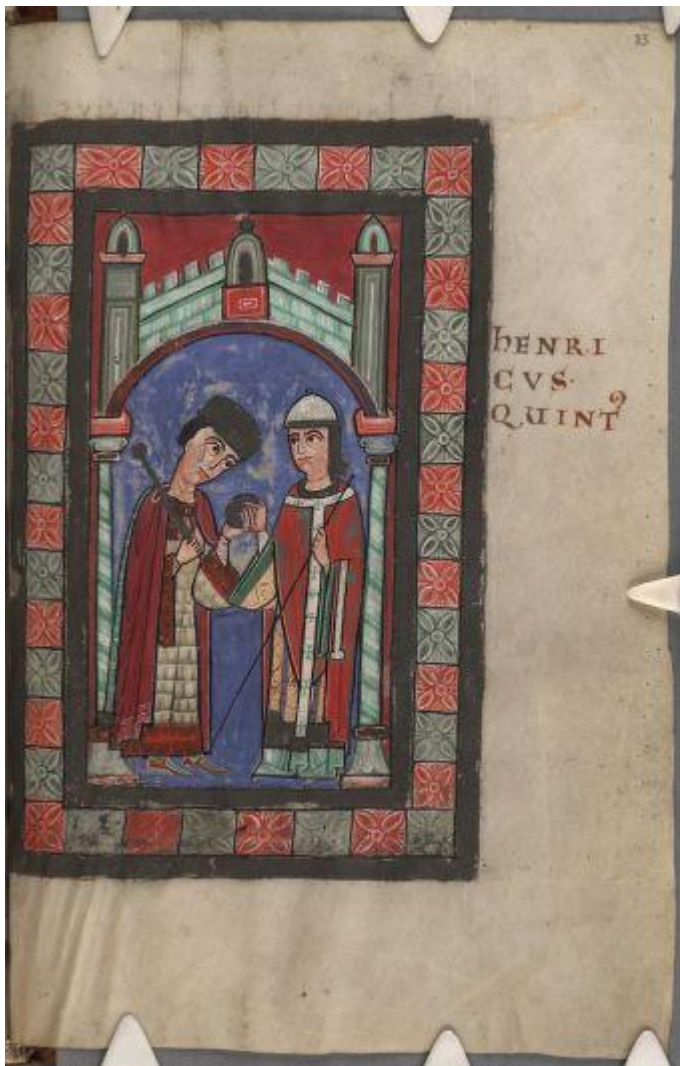

Abbildung 2: Erzbischof Ruthard von Mainz überreicht Heinrich V. die Sphaira. Darstellung in der Anonymen Kaiserchronik (1112/1114); Cambridge, Corpus Christi College, The Parker Library, CCCC Ms 373, f. 83r. [[Link 1](#)] [[Link 2](#)]

Beschreibung der Vorgänge in den Quellen, in denen diese bildliche Darstellungen enthalten sind (Edition mit Übersetzung):

*Ekkehard von Aura*: Frutolfs und Ekkehards Chroniken und die anonyme Kaiserchronik, hg. von Franz-Josef Schmale/Irene Schmale-Ott (Ausgewählte Quellen zur deutschen Geschichte des Mittelalters 15), Darmstadt 1972, Rezension I: S. 202/204; Rezension III, S. 270/272.

*Anonyme Kaiserchronik*: Ebd., S. 236/238.

## Fragen und Anregungen

- Beschreiben Sie die Bestandteile der bildlichen Darstellung und charakterisieren Sie die Gesamtkonzeption. Erläutern Sie, welche Botschaft vermittelt werden soll.
- Stellen Sie den bildlichen Darstellungen den begleitenden Text gegenüber und erörtern Sie Gemeinsamkeiten und Differenzen.
- Vergleichen Sie beide Werke miteinander (Bild und Text) und ordnen Sie die Überlieferung in den historischen Kontext ein.

## Lektüreempfehlungen

Althoff, Gerd, Heinrich IV. (Gestalten des Mittelalters und der Renaissance), 3. Aufl. Darmstadt 2013, S. 228–253.

Huth, Volker, Reichsinsignien und Herrschaftsentzug. Eine vergleichende Skizze zu Heinrich IV. und Heinrich (VII.) im Spiegel der Vorgänge von 1105/6 und 1235, in: Frühmittelalterliche Studien 26, 1992, S. 287–330.

Petersohn, Jürgen, Über monarchische Insignien und ihre Funktion im mittelalterlichen Reich, in: Historische Zeitschrift 266, 1998, S. 47–96, bes. S. 59–63.
