# Supplementary material
Source: publisher site journal article supplement (https://www.degruyterbrill.com/publication/isbn/9783110442656/downloadAsset/9783110442656_Buettner%20Koenigsherrschaft.zip)
Supplement: Supplementary file 13 [file mark_splm_9783110442649_Buttner Konigsherrschaft Kap. 8 Der Konig im Zentrum.pdf › mark_splm_9783110442649_Buttner Konigsherrschaft Kap. 8 Der Konig im Zentrum.pdf]

## 8 Der König im Zentrum – Zusatzmaterial

### 8.1 Der Umritt Heinrichs II. (1002/1003) und Konrads II. (1024/25)

Karten:

*Der Umritt Heinrichs II. (1002/03):*

[\[Link\]](#)

[Detailliertere Abbildung bei Weinfurter, Stefan, Heinrich II. (1002–1024). Herrscher am Ende der Zeiten, 3. Aufl. Regensburg 2002, S. 54]

*Der Umritt Konrads II. (1024/25):*

Weinfurter, Stefan, Das Jahrhundert der Salier (1024–1125), Ostfildern 2004, S. 33.

Clauss, Martin, Die Salier (Wissen im Quadrat), Darmstadt 2011, S. 19.

Quellen:

*Der Umritt Heinrichs II. (1002/03):*

Die Chronik des Bischofs Thietmar von Merseburg und ihre Korveier Überarbeitung, hg. von Robert Holtzmann (MGH SS rer. Germ. N.S. 9), Berlin 1935, I. V, c. 12–28, S. 234–253. [\[Link\]](#)

Thietmar von Merseburg, Chronik, hg. von Werner Trillmich (Ausgewählte Quellen zur deutschen Geschichte des Mittelalters. Freiherr vom Stein-Gedächtnisausgabe 9), 8. Aufl. Darmstadt 2002, c. I. V, c. 12–28, S. 205–223. *[Übersetzung]*

*Der Umritt Konrads II. (1024/25):*

Wipo, Gesta Chuonradi imperatoris, hg. von Harry Bresslau, in: Die Werke Wipos (MGH SS rer. Germ. [61]), 3. Aufl. Hannover/Leipzig 1915, S. 3–62, hier c. 6, S. 27–29. [\[Link\]](#)

Wipo, Gesta Chuonradi imperatoris, in: Quellen des 9. und 11. Jahrhunderts zur Geschichte der Hamburgischen Kirche und des Reiches. Rimbert Leben Ansgars, Adam von Bremen Bischofsgeschichte der Hamburger Kirche, Wipo Taten Kaiser Konrads II.,

Hermann von Reichenau Chronik, hg. von Werner Trillmich/Rudolf Buchner (Ausgewählte Quellen zur deutschen Geschichte des Mittelalters. Freiherr vom Stein-Gedächtnisausgabe 11), Darmstadt 1961, S. 522–613, hier c. 6, S. 557–559. *[Übersetzung]*

### **Fragen und Anregungen**

- Vergleichen Sie den Umritt Heinrichs II. (1002) und Konrads II. (1024) und begründen Sie Gemeinsamkeiten und Unterschiede der Routen. Erläutern Sie, was diesen Umritt notwendig machte und welchen Effekt die beiden Herrscher hierdurch erzielten.
- Vergleichen Sie die Berichte Thietmars von Merseburg und Wipos über die Umritte. Erörtern Sie, welche ergänzenden Informationen sich durch die Darstellung mittels Itinerarkarte gewinnen lassen und welche weiterführenden Deutungen möglich sind?

### **Lektüreempfehlungen**

Erkens, Franz-Reiner, Konrad II. (um 990–1039). Herrschaft und Reich des ersten Salierkaisers, Regensburg 1998, S. 56–64.

Weinfurter, Stefan, Heinrich II. (1002–1024). Herrscher am Ende der Zeiten, 3. Aufl. Regensburg 2002, S. 36–58.

Wolfram, Herwig, Konrad II. 990–1039. Kaiser dreier Reiche, München 2000, S. 74–86.

## 8.2 Einladung zum Hoftag (1274)

Das in allgemeiner Form überlieferte Ladungsschreiben zu einem Hoftag stammt wohl aus dem Frühjahr 1274 und bezieht sich auf den ersten Hoftag Rudolfs von Habsburg, der im November 1274 in Nürnberg stattfand.<sup>1</sup>

Durch die Salbung seiner Barmherzigkeit uns zur Anstrengung der Lenkung der römischen Monarchie salbend, verleiht der Allerhöchste uns in der Tat jenen Eifer zum Schutz der Gerechtigkeit, mit dieser Leidenschaft der Vergrößerung des allgemeinen Nutzens umgibt er ohne jeden Zweifel den Thron seines Gesalbten, so dass wir es nicht zu entgehen suchen, für das Staatswesen, das bisher durch verschiedene Angriffe des Unglücks beunruhigt wurde, alle möglichen persönlichen Mühen auf uns zunehmen und jeden beliebigen Aufwand an Sachen zu betreiben.

Aber weil es nicht in der Natur der Dinge möglich ist, dass das Wesen des gesamten Körpers vom Kopf ohne den Beistand der Glieder gelenkt wird, werden wir bisweilen dazu gebracht, andere als Teilnehmer in dieser Beförderung herbeizurufen. Daher ist es so, weil wir für die Wiederherstellung des zusammengebrochenen Zustands des Kaiserreichs und für die allgemeine Ruhe der Getreuen befohlen haben, einen allgemeinen Hoftag an jenem Ort an jenem bevorstehenden nächsten Festtag bekannt zu machen, dass wir deine Aufrichtigkeit aufmerksamer einladen und dich bitten und zugleich in der Treue, durch die du uns und dem Römischen Reich verbunden bist, auffordern, dass du dich bemühst, unter Beseitigung jeglicher Schwierigkeiten persönlich an der Feier des vorgenannten Hoftags teilzunehmen, damit was als die Einzelnen zu betreffen erkannt wird dort von den Einzelnen gebilligt wird. Und du wirst nichtsdestoweniger allen deinen Suffraganbischöfen nachdrücklich auferlegen, dass sie in ebenso ebendort am genannten Tag erscheinen sollen.

---

<sup>1</sup> MGH Constitutiones et acta publica imperatorum et regum, Bd. 3: 1273–1298, hg. von Jakob Schwalm, Hannover 1904–1906, Nr. 56, S. 49f., hier S. 50 [\[Link\]](#): *Ad Romane monarchie dirigenda molimina sue misericordie unctione nos ungens Altissimus illum nobis revera servande iusticie zelum indidit, eo commodi generalis augendi fervore circumdedit procul dubio solium christi sui, ut pro republica variis hactenus agitata calamitatum insultibus quoslibet personales subire labores quevisque rerum ferre dispendia non vitemus. Verum quia non est in rerum natura possibile, quod substantia corporis universi a capite sine membrorum subvencione regatur, inter dum cogimur alios in comportacionis huius participium evocare. Hinc est quod, cum pro reformatione collapsi status imperii et communi tranquillitate fidelium apud talem locum in instanti proximo festo tali curiam generalem duximus edicendam, sinceritatem tuam attentius invitamus, rogantes pariter et in fide qua nobis et imperio Romano astringeris requirentes, quatenus omni difficultate remota prediacte curie celebrationi presencialiter studeas interesse, ut quod singulos tangere noscitur, ibi a singulis approbetur; suffraganeis tuis omnibus nichilominus, quod ibidem similiter dicta die compareant, efficaciter iniuncturus.*

## Fragen und Anregungen

- Arbeiten Sie die Gründe heraus, die für das Abhalten eines Hoftags genannt werden. Ziehen Sie Vergleiche zu weiteren Einladungen aus verschiedenen Jahrhunderten (s. u., Lektüreempfehlungen).
- Stellen Sie der zum Ausdruck gebrachten Konzeption königlicher Herrschaft die Praxis königlichen Handelns gegenüber.
- Benennen Sie die in der inoffiziellen Zusammenfassung (s. u., Lektüreempfehlungen) festgehaltenen Beschlüsse des Hoftags. Vergleichen Sie diese mit den in der Einladung genannten Zielen der Versammlung.
- Erläutern Sie, welche Funktionen der erste Hoftag Rudolfs für dessen Herrschaftsbeginn hatte. Diskutieren Sie, inwiefern er als königliches oder fürstliches Herrschaftsinstrument gesehen werden kann.

## Lektüreempfehlungen

*Beschlüsse des Nürnberger Hoftags 1274 (mit Übersetzung):*

Quellen zur Verfassungsgeschichte des römisch-deutschen Reiches im Spätmittelalter, hg. von Lorenz Weinrich (Ausgewählte Quellen zur deutschen Geschichte des Mittelalters 33), Darmstadt 1983, Nr. 26, S. 108–114.

*Weitere Einladungsschreiben zu Hoftagen 1084 und 1155 (mit Übersetzung):*

Quellen zur deutschen Verfassungs-, Wirtschafts- und Sozialgeschichte bis 1250, hg. von Lorenz Weinrich (Ausgewählte Quellen zur deutschen Geschichte des Mittelalters 32), Darmstadt 1977, Nr. 38, S. 150/152; Nr. 60, S. 230.

*Weitere Einladungsschreiben zu Hoftagen 1338 und 1414 (mit Übersetzung):*

Quellen zur Verfassungsgeschichte des römisch-deutschen Reiches im Spätmittelalter, hg. von Lorenz Weinrich (Ausgewählte Quellen zur deutschen Geschichte des Mittelalters 33), Darmstadt 1983, Nr. 87, S. 286; Nr. 114, S. 457 f.

Krieger, Karl-Friedrich, Rudolf von Habsburg (Gestalten des Mittelalters und der Renaissance), Darmstadt 2003.

Redlich, Oswald, Rudolf von Habsburg. Das deutsche Reich nach dem Untergange des alten Kaisertums, Innsbruck 1903, S. 217, 223, 232–235. [[Link](#)]
