# Supplementary material
Source: publisher site journal article supplement (https://www.degruyterbrill.com/publication/isbn/9783110442656/downloadAsset/9783110442656_Buettner%20Koenigsherrschaft.zip)
Supplement: Supplementary file 14 [file mark_splm_9783110442649_Buttner Konigsherrschaft Kap. 9 Okonomische Grundlagen.pdf › mark_splm_9783110442649_Buttner Konigsherrschaft Kap. 9 Okonomische Grundlagen.pdf]

## 9 Ökonomische Grundlagen – Zusatzmaterial

### 9.1 Abbildungen des Tafelgüterverzeichnisses und der „Reichssteuerliste“ von 1241

*Tafelgüterverzeichnis*: Das Tafelgüterverzeichnis des römischen Königs (Ms. Bonn S. 1559), hg. von Carlrichard Brühl/ Theo Kölzer, Köln/Wien 1979, nach S. 51 (4 Tafeln).

„*Reichssteuerliste*“ von 1241: Schwalm, Jakob, Ein unbekanntes Eingangsverzeichnis von Steuern der königlichen Städte aus der Zeit Kaiser Friedrichs II., in: Neues Archiv der Gesellschaft für ältere deutsche Geschichtskunde 23, 1898, S. 517–558, hier nach S. 522. [\[Link\]](#)

#### Fragen und Anregungen

- Beschreiben Sie die äußere Form der Handschrift und vergleichen Sie sie mit der Textfassung der Edition.
- Reflektieren Sie ihre Annahmen, die Sie aufgrund der Lektüre des transkribierten Textes hatten: Wie hätten Sie sich das Aussehen der Quelle im Original vorgestellt?
- Erläutern Sie, welche zusätzlichen Erkenntnisse durch die Betrachtung des Originals möglich sind.

## 9.2 Das Reichsgut – Übersicht und Katalog

Kartographische Darstellungen des Reichsguts finden sich beispielsweise bei:

Großer Historischer Weltatlas. Teil 2: Mittelalter, hg. vom Bayerischen Schulbuchverlag, 2. Aufl. München 1979, S. 22 f.

Historischer Atlas von Baden-Württemberg. Kartenteil, hg. von der Kommission für Geschichtliche Landeskunde in Baden-Württemberg, Stuttgart 1988, Karte V,2 [dazu der Kommentar von Hansmartin Schwarzmaier, in: Erläuterungen, Stuttgart 1972–1988, Bd. 1].

Ein umfassendes Verzeichnis bietet:

Flach, Dietmar, Reichsgut 751–1024 (Geschichtlicher Atlas der Rheinlande. Beiheft V/17; Publikationen der Gesellschaft für Rheinische Geschichtskunde. XII. Abteilung 1b Neue Folge 11. Lieferung), Bonn 2008.

### 9.3 Die Fürstenprivilegien Friedrichs II. (1220, 1232)

Friedrich II. musste zu Beginn des 13. Jahrhunderts zunächst den geistlichen und dann allen Reichsfürsten bestimmte Rechte zuerkennen. Die beiden zentralen Privilegien tragen die Bezeichnung *Confoederatio cum principibus ecclesiasticis* („Vertrag mit den geistlichen Fürsten“, 1220) und *Statutum in favorem principum* („Statut zugunsten der Fürsten“, 1232), die ihnen im 19. Jahrhundert gegeben wurden.

Quellen:

*Confoederatio*: MGH Constitutiones et acta publica imperatorum et regum, Bd. 2: 1198–1272, hg. von Ludwig Weiland, Hannover 1906, Nr. 73, S. 86–91. [[Link](#)] [[Original](#)] [[Eintrag RI](#)]

*Statutum*: ebd., Nr. 171, S. 211–213. [[Link](#)] [[Original](#)] [[Eintrag RI](#)]

Übersetzung:

Deutsche Geschichte in Quellen und Darstellungen. Bd. 1: Frühes und hohes Mittelalter. 750–1250, hg. von Wilfried Hartmann (Reclams Universal-Bibliothek 17001), Stuttgart 1995, Nr. 92, S. 391–395; Nr. 95, S. 404–409.

Quellen zur deutschen Verfassungs-, Wirtschafts- und Sozialgeschichte bis 1250, hg. von Lorenz Weinrich (Ausgewählte Quellen zur deutschen Geschichte des Mittelalters 32), Darmstadt 1977, Nr. 95, S. 376–383; Nr. 114, S. 434–439.

#### Fragen und Anregungen

- Geben Sie den Inhalt der Privilegien wieder und strukturieren Sie die gewährten Rechte. Beschreiben Sie Gemeinsamkeiten und Unterschiede.
- Verorten Sie die Privilegien in ihrem Entstehungskontext. Diskutieren Sie die Frage, ob sie die Macht des Königs entschieden schmälerten.
- Erläutern Sie, wie das Zusammenwirken von König und Fürsten konzipiert wird (vgl. Kapitel 6).

- Vergleichen Sie die beiden Quellen im Hinblick auf Inhalt, Entstehung und Wirkung mit der ungarischen Goldenen Bulle von 1222 und der englischen Magna Charta von 1215 (vgl. Kapitel 5).

### **Lektüreempfehlungen**

Buschmann, Arno, Art. „Fürstenprivilegien Friedrichs II.“, in: Handwörterbuch zur deutschen Rechtsgeschichte 1, 2. Aufl. Berlin 2008, Sp. 1899–1905.

Klingelhöfer, Erich, Die Reichsgesetze von 1220, 1231/32 und 1235. Ihr Werden und ihre Wirkung im deutschen Staat Friedrichs II. (Quellen und Studien zur Verfassungsgeschichte des Deutschen Reiches in Mittelalter und Neuzeit 8,2), Weimar 1955.

Koller, Heinrich, Zur Diskussion über die Reichsgesetze Friedrichs II., in: Mitteilungen des Instituts für Österreichische Geschichtsforschung 66, 1958, S. 29–51.

Stürner, Wolfgang, Friedrich II. 1194–1250, 2 Bde., 3. Aufl. Darmstadt 2009, Bd. 1, S. 235–238, Bd. 2, S. 280–284.

## 9.4 Die Datierung des Tafelgüterverzeichnisses in Handbüchern und Überblickswerken

### Fragen und Anregungen

- Erstellen Sie eine Übersicht, welcher Datierung des Tafelgüterverzeichnisses in Handbüchern und Überblickswerken gefolgt wird. Charakterisieren Sie den Umgang mit den verschiedenen Datierungsvorschlägen durch die Forschung.

### Lektüreempfehlungen

Hassinger, Herbert, Politische Kräfte und Wirtschaft 500–1350, in: Handbuch der deutschen Wirtschafts- und Sozialgeschichte. Bd. 1: Von der Frühzeit bis zum Ende des 18. Jahrhunderts, hg. von Hermann Aubin/Wolfgang Zorn, Stuttgart 1971, S. 274–299, S. 293.

Indiculus curiarum ad mensam regiam pertinentium, URL: [www.geschichtsquellen.de/repOpus\\_02942.html](http://www.geschichtsquellen.de/repOpus_02942.html) (letzter Zugriff. 1.10.2017).

Opll, Ferdinand, Friedrich Barbarossa, 4. Aufl. Darmstadt 2009, S. 186.

Quellen zur deutschen Verfassungs-, Wirtschafts- und Sozialgeschichte bis 1250, hg. von Lorenz Weinrich (Ausgewählte Quellen zur deutschen Geschichte des Mittelalters 32), Darmstadt 1977, Nr. 51, S. 188.

Schimmelpfennig, Bernhard, Könige und Fürsten, Kaiser und Papst im 12. Jahrhundert (Enzyklopädie deutscher Geschichte 37), 2. Aufl. München 2010, S. 70 und 85.

Kölzer, Theo, Art. „Tafelgut, Tafelgüterverzeichnis“, in: Lexikon des Mittelalters 8, München 1997, Sp. 403–404.
