# Supplementary material
Source: publisher site journal article supplement (https://www.degruyterbrill.com/publication/isbn/9783110442656/downloadAsset/9783110442656_Buettner%20Koenigsherrschaft.zip)
Supplement: Supplementary file 15 [file mark_splm_9783110442649_Buttner Konigsherrschaft Zusatz A Online verfugbare Quellen.pdf › mark_splm_9783110442649_Buttner Konigsherrschaft Zusatz A Online verfugbare Quellen.pdf]

## A Online verfügbare Quellen

### A.1 Kapitel 1

- S. 2: [Gottfried von Viterbo, Speculum regum, c. 62, S. 91.](#)
  - o Gottfried von Viterbo, Speculum regum, hg. von Georg Waitz, in: MGH SS 22, Hannover 1872, S. 21–93.
- S. 3: [Einhard, Vita Karoli Magni, c. 1, S. 3.](#)
  - o Einhardi Vita Karoli Magni, hg. von Oswald Holder-Egger (MGH SS rer. Germ. [25]), 6. Aufl. Hannover/Leipzig 1911.
- S. 4: [Arnold von Lübeck, Chronica Slavorum, l. VI, c. 1, S. 213.](#)
  - o Arnold von Lübeck, Chronica Slavorum libri VII, hg. von Johann M. Lappenberg, in: MGH SS 21, Hannover 1869, S. 115–250.

### A.2 Kapitel 2

- S. 21: [Isidor von Sevilla, Etymologiae, l. 9, c. 3,1–4.](#)
  - o Isidori Hispalensis episcopi etymologiarum sive originum libri XX, hg. von Wallace Martin Lindsay (Scriptorum Classicorum Bibliotheca Oxoniensis), 2 Bde., Oxford 1911.
- S. 28: [Einhard, Vita Karoli Magni, c. 22–27, S. 26–32.](#)
  - o Einhardi Vita Karoli Magni, hg. von Oswald Holder-Egger (MGH SS rer. Germ. [25]), 6. Aufl. Hannover/Leipzig 1911.
- S. 31: [MGH D O I. 3, S. 92.](#)
  - o Die Urkunden Konrad I., Heinrich I. und Otto I., hg. von Theodor Sickel (MGH DD Germ. 1), Hannover 1879–1884.
- S. 31, Anm. 9: [RI II,1 Nr. 59.](#)
  - o Böhmer, Johann Friedrich, Regesta Imperii II. Sächsisches Haus 919–1024. 1: Die Regesten des Kaiserreichs unter Heinrich I. und Otto I. 919–973, bearb. von Emil von Ottenthal, Innsbruck 1893.
- S. 31, Anm. 9: [MGH D H I. 3.](#)
  - o Die Urkunden Konrad I., Heinrich I. und Otto I. (MGH DD Germ. 1), hg. von Theodor Sickel, Hannover 1879–1884.
- S. 33: [MGH D O I. 73.](#)
  - o Die Urkunden Konrad I., Heinrich I. und Otto I., hg. von Theodor Sickel (MGH DD Germ. 1), Hannover 1879–1884.

### A.3 Kapitel 3

- S. 37: [Silbermünze Theoderichs des Großen \(0,9 g, Ø 12 mm; 493–518\)](#).
- S. 38: Normannischer Anonymus, Tractatus J 24 III.
  - Es existiert eine gegenüber der hier verwendeten Edition von 1966 verbesserte Onlineedition, deren Abruf jedoch nicht zeitweise nicht mehr möglich war: <http://normananonymous.org/ENAP/about.jsp>
- S. 42: [Fredegar, Chronicae, l. III, c. 9, S. 95](#).
  - (Pseudo-)Fredegar, Chronicae [Chronicarum quae dicuntur Fredegarii scholastici libri IV cum continuationibus], hg. von Bruno Krusch, in: MGH SS rer. Merov. 2, Hannover 1888, S. 1–193
- S. 45: [Avitus von Vienne, Ep. 46, S. 75](#).
  - Avitus von Vienne, Epistularum ad diversos libri tres, in: Alcimi Ecdicii Aviti Viennensis episcopi Opera quae supersunt (MGH Auct. ant. 6,2), S. 35–103.
- S. 47: [Einhard, Vita Karoli Magni, c. 1, S. 3 f.](#)
  - Einhardi Vita Karoli Magni, hg. von Oswald Holder-Egger (MGH SS rer. Germ. [25]), 6. Aufl. Hannover/Leipzig 1911.

### A.4 Kapitel 4

- S. 52: [Jacobus de Cessolis, Liber de ludo scaccorum, Auszüge aus II, c. 1, Sp. 83–104; II, c. 2, Sp. 119–146; IV, c. 2, Sp. 757–760](#).
  - Das Schachzabelbuch Kunrats von Ammenhausen. Nebst den Schachbüchern des Jakob von Cessole und des Jakob Mennel, hg. von Ferdinand Vetter (Bibliothek älterer Schriftwerke der deutschen Schweiz. Ergänzungsband), Frauenfeld 1892.
- S. 53: Thomas von Aquin, De regno ad regem Cypri, l. I, c. 1, S. 451.
  - [\[Nichtkritische Edition\]](#)
  - [\[Nichtkritische Edition mit englischer Übersetzung\]](#)
- S. 55: [MGH D Lo III. 16, S. 20](#).
  - Die Urkunden Lothars III. und der Kaiserin Richenza, hg. von Emil von Ottenthal/Hans Hirsch (MGH DD Germ. 8), Berlin 1927.
- S. 55: [MGH Const. 4, Nr. 262, S. 229, § 3](#).
  - MGH Constitutiones et acta publica imperatorum et regum, Bd. 4: 1298–1313, hg. von Jakob Schwalm, Hannover/Leipzig 1906–1911.
- S. 56: [Wipo, Gesta Chuonradi imperatoris, c. 5, S. 27](#).

- Wipo, *Gesta Chuonradi imperatoris*, hg. von Harry Bresslau, in: *Die Werke Wipos* (MGH SS rer. Germ. [61]), 3. Aufl. Hannover/Leipzig 1915, S. 3–62.
- S. 58: Thomas von Aquin, *De regno ad regem Cypri*, l. I, c. 8, S. 459.
  - [\[Nichtkritische Edition\]](#)
  - [\[Nichtkritische Edition mit englischer Übersetzung\]](#)
- S. 59: [Johannes von Salisbury, Policraticus, l. IV, c. 1, S. 236.](#)
  - Ioannis Saresberiensis episcopi Carnotensis Policratici sive *De nugis curialium et vestigiis philosophorum*, hg. von Clemens C. I. Webb, 2 Bde., Oxford 1909.
- S. 61: [Pseudo-Cyprianus, De duodecim abusivis saeculi, c. 9, S. 51–53.](#)
  - Pseudo-Cyprianus, *De duodecim abusivis saeculi*, hg. von Siegmund Hellmann (Texte und Untersuchungen zur Geschichte der altchristlichen Literatur 34,1), Leipzig 1909.
- S. 62: [Otto von Freising, Gesta Friderici I. imperatoris, l. II, c. 3, S. 104 f.](#)
  - Otto von Freising, *Gesta Friderici I. imperatoris*, in: *Otonis et Rahewini Gesta Friderici I. imperatoris*, hg. von Georg Waitz (MGH SS rer. Germ. [46]), 3. Aufl. Hannover/Leipzig 1912, S. 1–161.

## A.5 Kapitel 5

- S. 69: [Magna Carta \(libertatum\), c. 61, S. 37.](#)
  - Magna Carta (libertatum), in: *Chartes des Libertés Anglaises* (1100–1305), hg. von Charles Bémont, Paris 1892, Nr. V, S. 26–39.
- S. 74, Anm. 3: [Liber Sextus, l. II, tit. XIV, c. 2.](#)
  - Corpus Iuris Canonici, hg. von Emil Friedberg, 2 Bde., Leipzig 1879–1881 (ND Graz 1959), hier Bd. 2, S. 959f.
- S. 75: [RTA 3, Nr. 204, S. 254–260, Auszüge, hier S. 255 f.](#)
  - Deutsche Reichstagsakten unter König Wenzel. Dritte Abtheilung 1397–1400, hg. von Julius Weizsäcker (Deutsche Reichstagsakten 3), München 1877

## A.6 Kapitel 6

- S. 82: [Radulfus de Diceto, Ymagines historiarum, Bd. 1, S. 355–366.](#)
  - Radulfus de Diceto, *Ymagines historiarum*, hg. von William Stubbs, in: *Radulfi de Diceto Decani Lundoniensis Opera Historica. The historical*

Works of Master Ralph de Diceto, Dean of London (*Rerum Britannicarum medii aevi scriptores* 68,1–2), London 1876, Bd. 1, S. 265–440, Bd. 2, S. 1–174.

- S. 84: Goldene Bulle, [c. 31, S. 630](#); [c. 24, S. 616](#).
  - o Die Goldene Bulle vom 10. Januar und 25. Dezember 1356 (lateinisch und frühneuhochdeutsch), in: MGH Const. 11: Dokumente zur Geschichte des deutschen Reiches und seiner Verfassung 1354–1356, bearb. von Wolfgang D. Fritz, Weimar 1978–1992, S. 560–633.
- S. 88: [MGH D F I. 795, S. 362 f.](#).
  - o Die Urkunden Friedrichs I., bearb. von Heinrich Appelt (MGH DD Germ. 10,1–5), 5 Bde., Hannover 1975–1990.

## A.7 Kapitel 7

- S. 95: [Gregor von Tours, Libri historiarum X, l. V, c. 20, S. 228](#).
  - o Gregor von Tours, Libri historiarum X, in: Gregorii Turonensis Opera. Teil 1: Libri historiarum X, hg. von Bruno Krusch/Wilhelm Levison (SS rer. Merov. 1,1), Hannover 1937, S. 1–537.
- S. 95: [MGH Capit. 1, Nr. 45, S. 126–130, Zitat S. 127](#).
  - o Capitularia regum Francorum, Bd. 1, hg. von Alfred Boretius (MGH Capit. 1), Hannover 1883.
- S. 96: [MGH Capit. 1, Nr. 136, S. 270–273, Zitate S. 271](#).
  - o Capitularia regum Francorum, Bd. 1, hg. von Alfred Boretius (MGH Capit. 1), Hannover 1883.
- S. 97: [Sachsenspiegel, Landrecht III 57,2, S. 243](#).
  - o Sachsenspiegel, hg. von Karl August Eckhardt (Fontes iuris N.S. 1), 2. Aufl. Göttingen 1955–1956.
- S. 97, Anm. 2: [Otto von Freising, Gesta Friderici I. imperatoris, l. II, c. 1, S. 103](#).
  - o Otto von Freising, Gesta Friderici I. imperatoris, in: Ottonis et Rahewini Gesta Friderici I. imperatoris, hg. von Georg Waitz (MGH SS rer. Germ. [46]), 3. Aufl. Hannover/Leipzig 1912, S. 1–161.
- S. 98: [MGH Capit. 1, Nr. 136, S. 271](#).
  - o Capitularia regum Francorum, Bd. 1, hg. von Alfred Boretius (MGH Capit. 1), Hannover 1883.
- S. 99: [Sachsenspiegel, Landrecht III 57,2, S. 243](#).
  - o Sachsenspiegel, hg. von Karl August Eckhardt (Fontes iuris N.S. 1), 2. Aufl. Göttingen 1955–1956.

- S. 99, Anm. 3: [Goldene Bulle, c. 2, § 1, S. 574/576.](#)
  - o Die Goldene Bulle vom 10. Januar und 25. Dezember 1356 (lateinisch und frühneuhochdeutsch), in: MGH Const. 11: Dokumente zur Geschichte des deutschen Reiches und seiner Verfassung 1354–1356, bearb. von Wolfgang D. Fritz, Weimar 1978–1992, S. 560–633.
- S. 100, Anm. 4: [Widukind, Sachsengeschichte, I, I, c. 26, S. 39.](#)
  - o Die Sachsengeschichte des Widukind von Korvei. Widukindi monachi Corbeiensis rerum gestarum Saxoniarum libri tres, hg. von Paul Hirsch/Hans-Eberhard Lohmann (MGH SS rer. Germ. [60]), 5. Aufl. Hannover 1935
- S. 104: [MGH LL 2, S. 389 f.](#)
  - o MGH Leges 2, hg. von Georg H. Pertz, Hannover 1837.

## A.8 Kapitel 8

- S. 110: [Wipo, Gesta Chuonradi imperatoris, c. 6, S. 29.](#)
  - o Wipo, Gesta Chuonradi imperatoris, hg. von Harry Bresslau, in: Die Werke Wipos (MGH SS rer. Germ. [61]), 3. Aufl. Hannover/Leipzig 1915, S. 3–62.
- S. 111: [Adalbold, Vita Heinrici II imperatoris, c. 19, S. 688.](#)
  - o Adalbold, Vita Heinrici II imperatoris, hg. von Georg Waitz, in: MGH SS 4, Hannover 1841, S. 683–695.
- S. 112: [MGH Const. 2, Nr. 106, S. 135.](#)
  - o MGH Constitutiones et acta publica imperatorum et regum, Bd. 2: 1198–1272, hg. von Ludwig Weiland, Hannover 1906.
- S. 117: [MGH Const. 1, Nr. 71, S. 120 f.](#)
  - o MGH Constitutiones et acta publica imperatorum et regum, Bd. 1: 911–1197, hg. von Ludwig Weiland, Hannover 1903.

## A.9 Kapitel 9

- S. 126: [RTA 8, Nr. 311, S. 375, § 5.](#)
  - o Deutsche Reichstagsakten unter Kaiser Sigmund. Zweite Abtheilung 1421–1426, hg. von Dietrich Kerler (Deutsche Reichstagsakten 8), Gotha 1883.
- S. 127: MGH Const. 2, [Nr. 338, S. 446 f.](#); [Nr. 307, S. 421 f.](#)

- MGH Constitutiones et acta publica imperatorum et regum, Bd. 2: 1198–1272, hg. von Ludwig Weiland, Hannover 1906.
- S. 128: [MGH Const. 1, Nr. 440, S. 646–649](#).
  - MGH Constitutiones et acta publica imperatorum et regum, Bd. 1: 911–1197, hg. von Ludwig Weiland, Hannover 1903.
- S. 131: [MGH Const. 3, S. 2–5](#).
  - MGH Constitutiones et acta publica imperatorum et regum, Bd. 3: 1273–1298, hg. von Jakob Schwalm, Hannover 1904–1906.

## A.10 Kapitel 10

- S. 141: [Johannes von Salisbury, Policraticus, l. V, c. 2, S. 282 f.](#)
  - Ioannis Saresberiensis episcopi Carnotensis Policratici sive De nugis curialium et vestigiis philosophorum, hg. von Clemens C. I. Webb, 2 Bde., Oxford 1909.
- S. 146: [Hinkmar, De ordine palatii, c. 6, S. 84](#).
  - Hinkmar von Reims, De ordine palatii, hg. von Thomas Gross/Rudolf Schieffer (MGH Font. iur. 3), Hannover 1980.
- S. 151: [Acerbus Morena, Historia, S. 167–171](#).
  - Acerbus Morena, Historia, hg. von Ferdinand Güterbock, in: Das Geschichtswerk des Otto Morena und seiner Fortsetzer über die Taten Friedrichs I. in der Lombardei (MGH SS rer. Germ. N.S. 7), Berlin 1930, S. 130–176.
- S. 152: [Gesta Regis Henrici Secundi, Bd. 1, S. 4 f.](#)
  - Gesta regis Henrici secundi Benedicti Abbatis. The chronicle of the reigns of Henry II and Richard I, A.D. 1169–1192, known commonly under the name of Bendedict of Peterborough, hg. von William Stubbs (Rerum Britannicarum medii aevi scriptores 49), 2 Bde., London 1867.

## A.11 Kapitel 11

- S. 155: [Böhmer, Acta imperii selecta, Nr. 972, S. 678](#).
  - Böhmer, Johann Friedrich, Acta imperii selecta. Urkunden deutscher Könige und Kaiser mit einem Anhang von Reichssachen, Innsbruck 1870
- S. 156, Anm. 1: RI V Nr. [4771](#) und [4772](#).

- Böhmer, Johann Friedrich, *Regesta Imperii V. Jüngere Staufer 1198–1272. Die Regesten des Kaiserreichs unter Philipp, Otto IV, Friedrich II, Heinrich (VII), Conrad IV, Heinrich Raspe, Wilhelm und Richard. 1198–1272, 3 Bde., bearb. von Julius Ficker/ Eduard Winkelmann, Innsbruck 1881–1901.*
- S. 161 mit Anm. 3: Goldene Bulle, [c. 1, § 15–16](#); [c. 5, § 1, S. 582](#).
  - Die Goldene Bulle vom 10. Januar und 25. Dezember 1356 (lateinisch und frühneuhochdeutsch), in: MGH Const. 11: Dokumente zur Geschichte des deutschen Reiches und seiner Verfassung 1354–1356, bearb. von Wolfgang D. Fritz, Weimar 1978–1992, S. 560–633
- S. 163: [RTA 8, Nr. 164, § 4, S. 188–191](#).
  - Deutsche Reichstagsakten unter Kaiser Sigmund. Zweite Abtheilung 1421–1426, hg. von Dietrich Kerler (Deutsche Reichstagsakten 8), Gotha 1883.

## A.12 Kapitel 12

- S. 172: [Matthaeus Parisiensis, Chronica maiora, Bd. 5, S. 190](#).
  - Matthaei Parisiensis monachi sancti albani Chronica maiora, hg. von Henry R. Luard (Rerum Britannicarum medii aevi scriptores 57), 7 Bde., London 1872–1883.
- S. 172, Anm. 2: [Cronica Reinhardsbrunnensis, S. 545](#).
  - Cronica Reinhardsbrunnensis, hg. von Oswald Holder-Egger, in: MGH SS 30,1, Hannover 1896, S. 490–656.
- S. 172, Anm. 2: [Astronomus, Vita Hludowici imperatoris, c. 64, S. 552](#).
  - Astronomus, Vita Hludowici imperatoris, hg. von Ernst Tremp, in: Thegan. Die Taten Kaiser Ludwigs – Astronomus, Das Leben Kaiser Ludwigs (MGH SS rer. Germ. 64), Hannover 1995, S. 279–555.
- S. 172, Anm. 2: [Nicolaus da Calvi \[de Carbio\], Vita Innocentii IV papae, c. 29, S. 102](#).
  - Nicolaus da Calvi [de Carbio], Vita Innocentii IV papae, hg. von Francesco Pagnotti, Niccolò da Calvi e la sua Vita d’Innocenzo IV, con una breve introduzione sulla istoriografia pontificia nei secoli XIII e XIV, in: Archivio della R. Società Romana di Storia Patria 21 (1898), S. 76–120.
- S. 173: [MGH D H IV. 325, S. 427](#).



- Die Urkunden Heinrichs IV., bearb. von Dietrich von Gladiss/Alfred Gawlik (MGH DD Germ. 6,1–3), 3 Bde., Berlin/Weimar/Hannover 1941–1978.
- S. 175: [Gesta regis Henrici secundi Benedicti Abbatis, Bd. 2, S. 71.](#)
  - Gesta regis Henrici secundi Benedicti Abbatis. The chronicle of the reigns of Henry II and Richard I, A.D. 1169–1192, known commonly under the name of Bendedict of Peterborough, hg. von William Stubbs (Rerum Britannicarum medii aevi scriptores 49), 2 Bde., London 1867.
- S. 175: [Matthaeus Parisiensis, Chronica maiora, Bd. 2, S. 345.](#)
  - Matthaei Parisiensis monachi sancti albani Chronica maiora, hg. von Henry R. Luard (Rerum Britannicarum medii aevi scriptores 57), 7 Bde., London 1872–1883.
- S. 175: [Matthaeus Parisiensis, Historia Angelorum, Bd. 1, S. 465.](#)
  - Matthaei Parisiensis, monachi sancti albani, Historia Anglorum, sive, ut vulgo dicitur, historia minor. Item, ejusdem abbreviatio chronicorum Angliae, hg. von Frederic Madden (Rerum Britannicarum medii aevi scriptores 44), 3 Bde., London 1866–1869.
- S. 179: [Einhard, Vita Karoli Magni, c. 30–33, S. 34–41.](#)
  - Einhardi Vita Karoli Magni, hg. von Oswald Holder-Egger (MGH SS rer. Germ. [25]), 6. Aufl. Hannover/Leipzig 1911.
- S. 181: [Thegan, Gesta Hludowici imperatoris, l. I, c. 7–8, S. 186/188.](#)
  - Thegan, Gesta Hludowici imperatoris, hg. von Ernst Tremp, in: Thegan. Die Taten Kaiser Ludwigs – Astronomus, Das Leben Kaiser Ludwigs (MGH SS rer. Germ. 64), Hannover 1995, S. 167–277.

### A.13 Kapitel 13

- S. 185 f.: Gloria laus, S. [154 f.](#), [159.](#)
  - Gloria laus, hg. von Natalis de Wailly/Léopold Victor Delisle/Charles-Marie-Gabriel Bréchillet Jourdain, in: Recueil des Historiens des Gaules et de la France, Bd. 23, Paris 1894, S. 154–160.
- S. 187 f.: [Venantius Fortunatus, Vita Sanctae Radegundis, c. 2 und 4, S. 39.](#)
  - Venantius Fortunatus, Vita Sanctae Radegundis, hg. von Bruno Krusch, in: Venanti Honori Clementiani Fortunati presbyteri Italici Opera pedestria (MGH Auct. ant. 4,2), Berlin 1885, S. 38–49.
- S. 188: [Baudovinia, Vita Sanctae Radegundis, l. II, passim.](#)



- Baudovinia, Vita Sanctae Radegundis, hg. von Bruno Krusch, in: Fredegarii et aliorum Chronica. Vitae sanctorum (MGH SS rer. Merov. 2), Hannover 1888, S. 364–395.
- S. 190: [Asser, De rebus gestis Aelfredi, S. 26.](#)
  - Asser's Life of King Alfred. Together with the Annals of Saint Neots erroneously ascribed to Asser = De rebus gestis Aelfredi, hg. von William Henry Stevenson, Oxford 1904, ND Oxford 1959.
- S. 191: Abbo von Fleury, Passio Sancti Eadmundi, [c. 8, S. 12](#); [c. 9, S. 13](#); [c. 10, S. 15](#); [c. 11, S. 16](#).
  - Abbo von Fleury, Passio Sancti Eadmundi, in: Memorials of St. Edmund's Abbey, Bd. 1, hg. von Thomas Arnold (Rerum Britannicarum medii aevi scriptores 96,1), London 1890, S. 3–25.
- S. 192, Anm. 5: [MGH D H II. 368, S. 470.](#)
  - Die Urkunden Heinrichs II. und Arduins, hg. von Harry Bresslau/Hermann Bloch/Robert Holtzmann (MGH DD Germ. 3), Hannover 1900–190
- S. 192, Anm. 7: [Geoffrey de Beaulieu, Vita Ludovici noni, c. 11, S. 6 f.](#)
  - Geoffrey de Beaulieu, Vita Ludovici noni, hg. von Pierre-Claude-François Daunou/Joseph Naudet, in: Recueil des historiens des Gaules et de la France, Bd. 20, Paris 1840, S. 3–27.
- S. 195: [MGH D F I. 502, S. 430–434, hier S. 432 f.](#)
  - Die Urkunden Friedrichs I., bearb. von Heinrich Appelt (MGH DD Germ. 10,1–5), 5 Bde., Hannover 1975–1990.
- S. 195: [MGH D Ka I. 295, S. 439–443, hier S. 442.](#)
  - Die Urkunden Pippins, Karlmanns und Karls des Großen, hg. von Engelbert Mühlbacher (MGH DD Kar. 1), Hannover 1906.
- S. 195, Anm. 10: [MGH D F I. 503, S. 434 f., hier S. 434.](#)
  - Die Urkunden Friedrichs I., bearb. von Heinrich Appelt (MGH DD Germ. 10,1–5), 5 Bde., Hannover 1975–1990.

## A.14 Kapitel 14

(keine Quellen)
