# Supplementary material
Source: publisher site journal article supplement (https://www.degruyterbrill.com/publication/isbn/9783110442656/downloadAsset/9783110442656_Buettner%20Koenigsherrschaft.zip)
Supplement: Supplementary file 16 [file mark_splm_9783110442649_Buttner Konigsherrschaft Zusatz B Online verfugbare Literatur.pdf › mark_splm_9783110442649_Buttner Konigsherrschaft Zusatz B Online verfugbare Literatur.pdf]

## B Online verfügbare Literatur

Im Folgenden wird die frei im Internet verfügbare Literatur angeführt (Open Access), mit einem direkten Link mittels des Kurztitels. Universitätsbibliotheken erlauben in der Regel einen Onlinezugriff auf eine noch größere Anzahl an Zeitschriften (via [JSTOR](#), [DigiZeitschriften](#) etc.) und Werke.

[Althoff 2001](#) Althoff, Gerd, Zur Einführung, in: Formen und Funktionen öffentlicher Kommunikation im Mittelalter, hg. von Gerd Althoff (Vorträge und Forschungen 51), Stuttgart 2001, S. 7–9.

[Bak 1990](#) Bak, János M. (Hg.), Coronations. Medieval and Early Modern Monarchic Ritual, Berkeley/Los Angeles/London 1990.

[Becher 1993](#) Becher, Matthias (Hg.), Eid und Herrschaft. Untersuchungen zum Herrscherethos Karls des Großen (Vorträge und Forschungen. Sonderband 39), Sigmaringen 1993.

[Becher 2009](#) Becher, Matthias, „Herrschaft“ im Übergang von der Spätantike zum Frühmittelalter. Von Rom zu den Franken, in: Von der Spätantike zum frühen Mittelalter. Kontinuitäten und Brüche, Konzeptionen und Befunde, hg. von Theo Kölzer/Rudolf Schieffer (Vorträge und Forschungen 70), Ostfildern 2009, S. 163–188.

[Beumann 1955](#) Beumann, Helmut, Die Historiographie des Mittelalters als Quelle für die Ideengeschichte des Königtums, in: Historische Zeitschrift 180, 1955, S. 449–488.

[Brühl 1956](#) Brühl, Carlrichard, Nochmals die Datierung des Tafelgüterverzeichnisses, in: Deutsches Archiv für Erforschung des Mittelalters 12, 1956, S. 527–535.

[Büttner 2012](#) [= Teilbd. 1; [Teilbd. 2](#)] Büttner, Andreas, Der Weg zur Krone. Rituale der Herrschererhebung im spätmittelalterlichen Reich (Mittelalter-Forschungen 35), Ostfildern 2012.

[Clauss/Stieldorf/Weller 2015](#) Clauss, Martin/ Stieldorf, Andrea/Weller, Tobias (Hg.), Der König als Krieger. Zum Verhältnis von Königtum und Krieg im Mittelal-

ter. Beiträge der Tagung des Zentrums für Mittelalterstudien der Otto-Friedrich-Universität Bamberg (13.–15. März 2013) (Bamberger interdisziplinäre Mittelalterstudien. Vorlesungen und Vorträge 5), Bamberg 2015.

[Deploige/Deneckere 2006](#) Deploige, Jeroen/Deneckere, Gita (Hg.), *Mystifying the Monarch. Studies on Discourse, Power, and History*, Amsterdam 2006.

[Dirlmeier 1992](#) Dirlmeier, Ulf, Friedrich Barbarossa – auch ein Wirtschaftspolitiker?, in: *Friedrich Barbarossa. Handlungsspielräume und Wirkungsweisen des stauischen Kaisers*, hg. von Alfred Haverkamp (Vorträge und Forschungen 40), Sigmaringen 1992, S. 501–518.

[Dücker 2011](#) Dücker, Julia, *Reichsversammlungen im Spätmittelalter. Politische Willensbildung in Polen, Ungarn und Deutschland* (Mittelalter-Forschungen 37), Ostfildern 2011.

[Ehlers, J. 2000](#) Ehlers, Joachim, Magdeburg – Rom – Aachen – Bamberg. Grablege des Königs und Herrschaftsverständnis in ottonischer Zeit, in: *Otto III. – Heinrich II. Eine Wende?*, hg. von Bernd Schneidmüller/Stefan Weinfurter (Mittelalter-Forschungen 1), 2. Aufl. Stuttgart 2000, S. 47–76.

[Erben 1907](#) Erben, Wilhelm, *Die Kaiser- und Königsurkunden des Mittelalters in Deutschland, Frankreich und Italien* (Handbuch der mittelalterlichen und neueren Geschichte 4,1), München/Berlin 1907.

[Erkens 1996](#) Erkens, Franz-Reiner, *Divisio legitima und unitas imperii*. Teilungspraxis und Einheitsstreben bei der Thronfolge im Frankenreich, in: *Deutsches Archiv für Erforschung des Mittelalters* 52, 1996, S. 423–485.

[Ewig 1956](#) Ewig, Eugen, Zum christlichen Königsgedanken im Frühmittelalter, in: *Das Königtum. Seine geistigen und rechtlichen Grundlagen*. Mainau-Vorträge 1954 (Vorträge und Forschungen 3), Lindau/Konstanz 1956, S. 7–73.

[Fößel 2000](#) Fößel, Amalie, *Die Königin im mittelalterlichen Reich. Herrschaftsausübung, Herrschaftsrechte, Handlungsspielräume* (Mittelalter-Forschungen 4), Stuttgart 2000.

[Fried 1984](#) Fried, Johannes, Die Wirtschaftspolitik Friedrich Barbarossas in Deutschland, in: *Blätter für deutsche Landesgeschichte* 120, 1984, S. 195–239.

[Gäbe 1989](#) Gäbe, Sabine, Radegundis. Sancta, regina, ancilla. Zum Heiligkeitsideal der Radegundisviten von Fortunat und Baudonivia, in: Francia. Forschungen zur westeuropäischen Geschichte 16, 1989, S. 1–30.

[Goetz/Jarnut 2003](#) Goetz, Hans-Werner/Jarnut, Jörg (Hg.), Mediävistik im 21. Jahrhundert. Stand und Perspektiven der internationalen und interdisziplinären Mittelalterforschung (MittelalterStudien des Instituts zur Interdisziplinären Erforschung des Mittelalters und seines Nachwirkens, Paderborn 1), München 2003.

[Hoffmann, H. 1964](#) Hoffmann, Hartmut, Die Unveräußerlichkeit der Kronrechte im Mittelalter, in: Deutsches Archiv für Erforschung des Mittelalters 20, 1964, S. 389–474.

[Kern 1954](#) [= 1. Aufl.] Kern, Fritz, Gottesgnadentum und Widerstandsrecht im früheren Mittelalter. Zur Entwicklungsgeschichte der Monarchie, 2. Aufl. Darmstadt 1954.

[Kölzer 2002](#) Kölzer, Theo, Der Hof Kaiser Barbarossas und die Reichsfürsten, in: Deutscher Königshof, Hoftag und Reichstag im späteren Mittelalter, hg. von Peter Moraw (Vorträge und Forschungen 48), Stuttgart 2002, S. 1–47.

[Krieg 2003](#) Krieg, Heinz, Herrscherdarstellung in der Stauferzeit. Friedrich Barbarossa im Spiegel seiner Urkunden und der staufischen Geschichtsschreibung (Vorträge und Forschungen. Sonderband 50), Ostfildern 2003.

[Leyser 1992](#) Leyser, Karl, Friedrich Barbarossa – Hof und Land, in: Friedrich Barbarossa. Handlungsspielräume und Wirkungsweisen des staufischen Kaisers, hg. von Alfred Haverkamp (Vorträge und Forschungen 40), Sigmaringen 1992, S. 519–530.

[Moraw 1992](#) Moraw, Peter, Franken als königsnahe Landschaft im späten Mittelalter, in: Blätter für deutsche Landesgeschichte 112, 1976, S. 123–138.

[Moraw 2002](#) Moraw, Peter (Hg.), Deutscher Königshof, Hoftag und Reichstag im späteren Mittelalter (Vorträge und Forschungen 48), Stuttgart 2002.

[Moraw 2005a](#) Moraw, Peter (Hg.), Die deutschsprachige Mediävistik im 20. Jahrhundert (Vorträge und Forschungen 62), Ostfildern 2005.

[Moraw 2005b](#) Moraw, Peter, Kontinuität und später Wandel: Bemerkungen zur deutschen und deutschsprachigen Mediävistik 1945–1970/75, in: Die deutschsprachi-

ge Mediävistik im 20. Jahrhundert, hg. von Peter Moraw (Vorträge und Forschungen 62), Ostfildern 2005, S. 103–138.

[Müller 2004](#) Müller, Heribert, Aktuelle Tendenzen historischer Mittelalterforschung in Frankreich und Deutschland. Anmerkungen zu Repräsentativität, Orientierung und Auswahl einer Neuerscheinung, in: Francia. Forschungen zur westeuropäischen Geschichte 31, 2004, S. 181–197.

[Nagel 2005](#) Nagel, Anne Christine, Im Schatten des Dritten Reichs. Mittelalterforschung in der Bundesrepublik Deutschland 1945–1970 (Formen der Erinnerung 24), Göttingen 2005.

[Petersohn 1994](#) Petersohn, Jürgen (Hg.), Politik und Heiligenverehrung im Hochmittelalter (Vorträge und Forschungen 42), Sigmaringen 1994.

[Rady 2014](#) Rady, Martyn, Hungary and the Golden Bull of 1222, in: Banatica 24, 2014, S. 87–108.

[Rexroth 2003](#) Rexroth, Frank, Rituale und Ritualismus in der historischen Mittelalterforschung. Eine Skizze, in: Mediävistik im 21. Jahrhundert. Stand und Perspektiven der internationalen und interdisziplinären Mittelalterforschung, hg. von Hans-Werner Goetz/Jörg Jarnut (MittelalterStudien des Instituts zur Interdisziplinären Erforschung des Mittelalters und seines Nachwirkens, Paderborn 1), München 2003, S. 391–406.

[Schlesinger 1975](#) Schlesinger, Walter, Gedanken zur Datierung des Verzeichnisses der Höfe, die zur Tafel des Königs der Römer gehören, in: Jahrbuch für fränkische Landesforschung 34/35, 1975, S. 185–203.

[Schneider, R. 1987](#) Schneider, Reinhard (Hg.), Das spätmittelalterliche Königtum im europäischen Vergleich (Vorträge und Forschungen 32), Sigmaringen 1987.

[Schneidmüller 2000](#) Schneidmüller, Bernd, Konsensuale Herrschaft. Ein Essay über Formen und Konzepte politischer Ordnung im Mittelalter, in: Reich, Regionen und Europa in Mittelalter und Neuzeit. Festschrift für Peter Moraw, hg. von Paul-Joachim Heinig (Historische Forschungen 67), Berlin 2000, S. 53–87.

[Schneidmüller 2005](#) Schneidmüller, Bernd, Von der Verfassungsgeschichte zur Geschichte der politischen Ordnungen und Identitäten im europäischen Mittelalter, in: Zeitschrift für Geschichtswissenschaft 55, 2005, S. 485–500.

[Schneidmüller/Weinfurter 2006](#) Schneidmüller, Bernd/Weinfurter, Stefan, Ordnungskonfigurationen. Die Erprobung eines Forschungsdesigns, in: Ordnungskonfigurationen im hohen Mittelalter, hg. von Bernd Schneidmüller/Stefan Weinfurter (Vorträge und Forschungen 64), Ostfildern 2006, S. 7–18.

[Schwalm 1898](#) Schwalm, Jakob, Ein unbekanntes Eingangsverzeichnis von Steuern der königlichen Städte aus der Zeit Kaiser Friedrichs II., in: Neues Archiv der Gesellschaft für ältere deutsche Geschichtskunde 23, 1898, S. 517–558.

[Suchan 2014](#) Suchan, Monika, Gerechtigkeit in christlicher Verantwortung. Neue Blicke in die Fürstenspiegel des Frühmittelalters, in: Francia. Forschungen zur westeuropäischen Geschichte 41, 2014, S. 1–23.

[Vagnoni 2013](#) Vagnoni, Mirko, Royal Images and Sacred Elements in Norman-Swabian and Angevin-Aragonese Kingdom of Sicily, in: Eikón. Imago 2, 2013, S. 107–122.

[Waitz 1844–1878](#) Waitz, Georg, Deutsche Verfassungsgeschichte von den Germanen bis zum 12. Jahrhundert, 8 Bde., Kiel 1844–1878.

[Wattenbach 1858](#) [= 6 Aufl.] Wattenbach, Wilhelm, Deutschlands Geschichtsquellen im Mittelalter bis zur Mitte des dreizehnten Jahrhunderts, Berlin 1858.

[Woodacre/Sarti 2015](#) Woodacre, Elena/Sarti, Cathleen, What is Royal Studies?, in: Royal Studies Journal 2, 2015, S. 13–20.
