# Supplementary material
Source: publisher site journal article supplement (https://www.degruyterbrill.com/publication/isbn/9783110442656/downloadAsset/9783110442656_Buettner%20Koenigsherrschaft.zip)
Supplement: Supplementary file 17 [file mark_splm_9783110442649_Buttner Konigsherrschaft Zusatz C Liste der Kaiser und Konige im mitelalterlichen Europa.pdf › mark_splm_9783110442649_Buttner Konigsherrschaft Zusatz C Liste der Kaiser und Konige im mitelalterlichen Europa.pdf]

## C Liste der Kaiser und Könige im mittelalterlichen Europa

Die Angaben beziehen sich nur auf die Regierungszeit als Kaiser bzw. König. Die Schreibweise einzelner Namen kann abweichen. Die Beinamen sind überwiegend nachmittelalterlich, wurden hier jedoch zur besseren Orientierung beibehalten. Zu Beginn stehen die verschiedenen Kaiserreiche, gefolgt von den Königreichen in alphabetischer Ordnung. Die germanischen Königreiche des frühen Mittelalters sind mit Ausnahme des Frankenreichs unter dem Eintrag „Germanischen Königreiche“ eingeordnet. Die Unterscheidung von Dynastien erfolgt allein für das Heilige Römische Reich. Die Liste basiert auf folgenden Zusammenstellungen, deren Angaben sich im Einzelnen geringfügig unterscheiden können:

- Feldkamp, Michael, Regentenlisten und Stammtafeln zur Geschichte Europas. Vom Mittelalter bis zur Gegenwart, Stuttgart 2002.
- Grotefend, Hermann, Taschenbuch der Zeitrechnung des deutschen Mittelalters und der Neuzeit, 14. Aufl. Hannover 2007, S. 111–118.
- <http://www.manfred-hiebl.de/mittelalter-genealogie/mittelalter/koenige.htm> (letzter Zugriff 1.10.2017).
- Lexikon des Mittelalters.

## Liste der Kaiser und Könige im mittelalterlichen Europa

|                                                 |    |
|-------------------------------------------------|----|
| Heiliges Römisches Reich .....                  | 1  |
| Heiliges Römisches Reich (ohne Dynastien) ..... | 3  |
| Byzantinisches Kaiserreich .....                | 4  |
| Lateinisches Kaiserreich .....                  | 6  |
| Kaiserreich Trapezunt .....                     | 7  |
| Aragón .....                                    | 8  |
| Armenien .....                                  | 9  |
| Asturien .....                                  | 10 |
| Böhmen .....                                    | 11 |
| Bulgarien .....                                 | 12 |
| Burgund .....                                   | 13 |
| Dänemark .....                                  | 14 |
| England .....                                   | 15 |
| Frankenreich .....                              | 16 |
| <i>Merowinger</i> .....                         | 16 |
| <i>Karolinger</i> .....                         | 16 |
| Frankreich .....                                | 18 |
| Germanische Königreiche .....                   | 19 |
| Angelsachen .....                               | 19 |
| Burgunder .....                                 | 22 |
| Franken .....                                   | 22 |
| Langobarden .....                               | 22 |
| Ostgoten .....                                  | 22 |
| Thüringer .....                                 | 22 |
| Vandalen .....                                  | 22 |
| Westgoten .....                                 | 23 |
| Italien .....                                   | 24 |
| Jerusalem .....                                 | 25 |
| Kastilien .....                                 | 26 |
| Kleinarmenien .....                             | 27 |
| Kroatien .....                                  | 28 |
| León .....                                      | 29 |
| Mallorca .....                                  | 30 |
| Navarra .....                                   | 31 |
| Neapel .....                                    | 32 |
| Norwegen .....                                  | 33 |
| Portugal .....                                  | 34 |
| Polen .....                                     | 35 |
| Serbien .....                                   | 36 |
| Schottland .....                                | 37 |
| Schweden .....                                  | 38 |
| Sizilien .....                                  | 39 |
| Thessaloniki .....                              | 40 |
| Ungarn .....                                    | 41 |

|              |    |
|--------------|----|
| Zypern ..... | 42 |
|--------------|----|



## Heiliges Römisches Reich

951 mit Italien, 962 mit dem römischen Kaisertum, 1033 mit Burgund verbunden. Das Römische Reich (*Imperium Romanum*) erhielt im 12. Jahrhundert die Bezeichnung „*Sacrum*“ (heilig), im 15. Jahrhundert außerdem den Zusatz „Deutscher Nation“.

### *Konradiner*

Konrad I. (911–918)

### *Ottonen*

Heinrich I. (919–936)

Otto I. der Große (936–973, Kaiser 962)

Otto II. (973–983, Kaiser 967)

Otto III. (983–1002, Kaiser 996)

Heinrich II. (1002–1024, Kaiser 1014)

### *Salier*

Konrad II. (1024–1039, Kaiser 1027)

Heinrich III. (1039–1056, Kaiser 1046)

Heinrich IV. (1056–1106, Kaiser 1084)

*Rudolf von Rheinfelden* (Gegenkönig 1077–1080)

*Hermann von Salm* (Gegenkönig 1081–1081)

Konrad (Mitkönig 1087–1093, Gegenkönig 1093–1098)

Heinrich V. (1106–1125, Kaiser 1111)

### *Supplinburger*

Lothar III. (1125–1137, Kaiser 1133)

### *Staufer*

Konrad III. (1138–1152, Gegenkönig 1127/28–1135)

Heinrich (VI.) (Mitkönig 1147–1150)

Friedrich I. Barbarossa (1152–1190, Kaiser 1155)

Heinrich VI. (1190–1197, Kaiser 1191)

Philipp von Schwaben (1198–1208)

### *Welfen*

Otto IV. (1198–1218, Kaiser 1209)

### *Staufer*

Friedrich II. (1212–1250, Kaiser 1220)

Heinrich (VII.) (Mitkönig 1222–1235)

Konrad IV. (1250–1254)

### *Verschiedene Dynastien („Interregnum“)*

Heinrich Raspe (Gegenkönig 1246–1247)

Wilhelm von Holland (Gegenkönig 1247–1256)

Richard von Cornwall (1257–1272)

Alfons von Kastilien (1257–1284)

### *Habsburger*

Rudolf I. von Habsburg (1273–1291)

### *Nassauer*

Adolf von Nassau (1292–1298)

### *Habsburger*

Albrecht I. (1298–1308)

### *Luxemburger*

Heinrich VII. (1308–1313, Kaiser 1312)

### *Wittelsbacher*

Ludwig IV. „der Bayer“ (1314–1347, Kaiser 1328)

### *Habsburger*

Friedrich „der Schöne“ (Gegenkönig 1314–1330)

### *Luxemburger*

Karl IV. (1346–1378, Kaiser 1355)

*Günther von Schwarzburg* (Gegenkönig 1349)

Wenzel (1376–1400; abgesetzt 1400, gestorben 1419)

*Wittelsbacher*

Ruprecht von der Pfalz (1400–1410)

*Luxemburger*

Jobst von Mähren (1410–1411)

Sigismund (1410–1437, Kaiser 1433)

*Habsburger*

Albrecht II. (1438–1439)

Friedrich III. (1440–1493, Kaiser 1452)

Maximilian I. (1486–1519, erwählter Kaiser  
1508)

## Heiliges Römisches Reich (ohne Gliederung nach Dynastien)

Konrad I. (911–918)

Heinrich I. (919–936)

Otto I. der Große (936–973, Kaiser 962)

Otto II. (973–983, Kaiser 967)

Otto III. (983–1002, Kaiser 996)

Heinrich II. (1002–1024, Kaiser 1014)

Konrad II. (1024–1039, Kaiser 1027)

Heinrich III. (1039–1056, Kaiser 1046)

Heinrich IV. (1056–1106, Kaiser 1084)

Rudolf von Rheinfelden (Gegenkönig 1077–1080)

Hermann von Salm (Gegenkönig 1081–1081)

Konrad (Mitkönig 1087–1093, Gegenkönig 1093–1098)

Heinrich V. (1106–1125, Kaiser 1111)

Lothar III. (1125–1137, Kaiser 1133)

Konrad III. (1138–1152, Gegenkönig 1127/28–1135)

Heinrich (VI.) (Mitkönig 1147–1150)

Friedrich I. Barbarossa (1152–1190, Kaiser 1155)

Heinrich VI. (1190–1197, Kaiser 1191)

Philipp von Schwaben (1198–1208)

Otto IV. (1198–1218, Kaiser 1209)

Friedrich II. (1212–1250, Kaiser 1220)

Heinrich (VII.) (Mitkönig 1222–1235)

Konrad IV. (1250–1254)

Heinrich Raspe (Gegenkönig 1246–1247)

Wilhelm von Holland (Gegenkönig 1247–1256)

Richard von Cornwall (1257–1272)

Alfons von Kastilien (1257–1284)

Rudolf I. von Habsburg (1273–1291)

Adolf von Nassau (1292–1298)

Albrecht I. (1298–1308)

Heinrich VII. (1308–1313, Kaiser 1312)

Ludwig IV. „der Bayer“ (1314–1347, Kaiser 1328)

Friedrich „der Schöne“ (Gegenkönig 1314–1330)

Karl IV. (1346–1378, Kaiser 1355)

Günther von Schwarzburg (Gegenkönig 1349)

Wenzel (1376–1400; abgesetzt 1400, gestorben 1419)

Ruprecht von der Pfalz (1400–1410)

Jobst von Mähren (1410–1411)

Sigismund (1410–1437, Kaiser 1433)

Albrecht II. (1438–1439)

Friedrich III. (1440–1493, Kaiser 1452)

Maximilian I. (1486–1519, erwählter Kaiser 1508)

## Byzantinisches Kaiserreich

Nachfolger des Römischen Reichs. Nebeneinander eines Lateinischen Kaiserreichs in Konstantinopel und eines griechischen Kaiserreichs in Nikaia 1204–1261, später verschiedene Kleinreiche. Endet mit der Eroberung von Konstantinopel durch die Osmanen (1453) bzw. dem Untergang des → Kaiserreichs Trapezunt 1461. Falls nicht anders ausgewiesen, wird die Zeit der Mitregentschaft nicht angegeben.

Arcadius (395–408)  
Theodosius II. (408–450)  
Markian (450–457)  
Leon I. (457–474)  
Leon II. (474)  
Zenon (474–475 und 476–491)  
Basiliskos (475–476)  
Anastasios I. (491–518)  
Justin I. (518–527)  
Justinian I. (527–565)  
Justin II. (565–578)  
Tiberios I. (578–582)  
Maurikios (582–602)  
Theodosius (III.) (590–602) [Mitregent]  
Phokas (602–610)  
Herakleios I. (610–641)  
Konstantin III. (641)  
Herakleios II. Heraklonas (641)  
Konstans II. (641–668)  
Konstantin IV. Pogonatos (668–685)  
Justinian II. Rhinometos (685–695 und 705–711)  
Leontios (695–698)  
Tiberios II. Apsimaros (698–705)  
Philippikos (711–713)  
Anastasios II. (713–715)  
Theodosius III. (715–717)

Leon III. (716–741)  
Konstantin V. Kopromnimos (741–775)  
Leon IV. Khazar (775–780)  
Konstantin VI. (780–797)  
Irene (790 und 797–802)  
Nikephoros I. (802–811)  
Staurakios (811)  
Michael I. Rhangabe (811–813)  
Leon V. (813–820)  
Michael II. (820–829)  
Theophilos (829–842)  
[Theodora (Regentin 842–856)]  
Michael III. (842–867)  
Bardas (862–866) [Mitregent]  
Basileios I. (867–886)  
Leon VI. (886–912)  
Alexanderos (912–913)  
Konstantin VII. (913–959)  
Romanos I. (920–944) [Mitkaiser]  
Romanos II. (959–963)  
Basileios II. (963 und 976–1025)  
Nikephoros II. (963–969) [Mitkaiser]  
Johannes I. (969–976) [Mitkaiser]  
Nikephoros Phokas (1022)  
Konstantin VIII. (1025–1028)  
Romanos III. (1028–1034)  
Michael IV. (1034–1041)  
Michael V. (1041–1042)  
Zoe (1042)  
Konstantin IX. (1042–1055)  
Theodora III. (1042 und 1055–1056)  
Michael VI. (1056–1057)  
Isaak I. Komnenos (1057–1059)  
Konstantin X. Dukas (1059–1067)  
Eudokia Dukaina (1067 und 1071)  
Romanos IV. Diogenes (1068–1071)  
[Mitkaiser]  
Michael VII. Dukas (1071–1078)  
Nikephoros III. Botoneiates (1078–1081)  
Alexios I. (1081–1118)



Johannes II. (1118–1143)  
Manuel I. (1143–1180)  
Alexios II. (1180–1183)  
Johannes Batatzes (1182)  
Andronikos I. (1183–1185)  
Isaak II. (1185–1195 und 1203–1204)  
Alexios III. (1195–1203)  
Alexios IV. (1203–1204) [gemeinsam mit  
Isaak II.]  
Alexios V. Murtzuphlos (1204)  
Konstantin XI. (1204–1205)  
Theodor I. (1205–1222)  
Johannes III. (1222–1254)  
Theodor II. (1254–1258)  
Johannes IV. (1258)  
Michael VIII. (1258–1282)  
Andronikos II. (1282–1328)  
Michael IX. (1281–1320) [Mitregent]  
Andronikos III. (1328–1341)  
Johannes V. (1341–1376 und 1379–1391)  
Johannes VI. Kantakuzenos (1347–1354)  
Andronikos IV. Palaiologos (1376–1379)  
Johannes VII. (1390 und 1399–1402)  
[Usurpator und Regent]  
Manuel II. (1391–1425)  
Johannes VIII. (1425–1448)  
Konstantin XI. (1449–1453)

## **Lateinisches Kaiserreich**

Balduin I. von Flandern (1204–1205)

Heinrich I. (1206–1216)

Peter von Courtenay-Auxerre (1217)

[Jolante (Regentin 1217–1219)]

Robert von Courtenay-Auxerre (1221–  
1228)

Balduin II. (1228–1261)

Johann von Brienne (1231–1237)

## Kaiserreich Trapezunt

Alexios I. (1204–1222)  
Andronikos I. (1222–1235)  
Johannes I. (1235–1238)  
Manuel I. (1238–1263)  
Andronikos II. (1263–1267)  
Georgios (1267–1280)  
Johannes II. (1280–1297)  
Alexios II. (1297–1330)  
Andronikos III. (1330–1332)  
Manuel II. (1332)  
Basileios (1332–1340)  
Irene Palaiologina (1340–1341)  
Anna Anachoutlou (1341–1342)  
Michael (1341 und 1344–1349)  
Johannes III. (1342–1344)  
Johannes Alexios III. (1349–1390)  
Manuel III. (1390–1412)  
Alexios IV. (1412–1429)  
Johannes IV. Kaloiohannes (1429–1458)  
David (1458–1461)

## Aragón

Königreich seit 1035, geht nach 1516 im  
Königreich Spanien auf.

Ramiro I. (1035–1063)

Sancho I. Ramirez (1063–1094) [→ Navarra]

Peter I. (1094–1104) [→ Navarra]

Alfons I. der Streitbare (1104–1134) [→  
Navarra]

Ramiro II. der Mönch (1134–1137)

Petronella (1137–1162)

Raimund Berengar IV. von Barcelona  
(1137–1162)

Alfons II. der Keusche (1162–1196)

Peter II. der Katholische (1196–1213)

Jakob I. der Eroberer (1213–1276)

Peter III. der Große (1276–1285)

Alfons III. der Prächtige (1285–1291)

Jakob II. der Gerechte (1291–1327)

Alfons IV. der Gütige (1327–1336)

Peter IV. der Zeremoniöse (1336–1387)

Johann I. der Jäger (1387–1396)

Martin I. der Menschliche (1396–1410)

Ferdinand I. der Gerechte (1412–1416)

Alfons V. der Prächtige (1416–1458)

Johann II. (1458–1479)

Ferdinand II. der Katholische (1479–1516)

## Armenien

Siehe auch: → Kleinarmenien.

Ashot I. (885–890)

Semnat I. (890–914)

Ashot II. (914–928)

Abas I. (928–953)

Ashot III. (953–977)

Semnat II. (977–989)

Gagik I. (989–1020)

Johannes-Semnat III. (1020–1040)

Ashot IV. (1021–1039)

Gagik II. (1042–1045)

## **Asturien**

910 geteilt in Kastilien und León.

Pelayo (718/22–737)

Favila (737–739)

Alfons I. der Katholische (739–757)

Fruela I. (757–768)

Aurelio (768–774)

Silo (774–783)

Mauregato (783–788)

Bermudo I. (788–791)

Alfons II. der Keusche (791–842)

Ramiro I. (842–850)

Ordonõ I. (850–866)

Alfons III. (866–910)

## Böhmen

Vratislav I. (1085–1092)  
Vladislav I. (1158–1174)  
Ottokar I. (1198–1230)  
Wenzel I. (1230–1253)  
Ottokar II. (1253–1278)  
Wenzel II. (1278–1305)  
Wenzel III. (1305–1306)  
Rudolf von Österreich (1307)  
Heinrich von Kärnten (1307–1310)  
Johann „der Blinde“ (1311–1346)  
Karl I. (1346–1378) [→ Heiliges Römisches Reich (= HRR)]  
Wenzel IV. (1378–1419) [→ HRR]  
Sigismund (1420–1437) [→ HRR]  
Albrecht (1438–1439) [→ HRR]  
Ladislaus Postumus (1440–1457)  
Georg von Podiebrad (1458–1471)  
Matthias Corvinus (Gegenkönig 1469–1490) [→ Ungarn]  
Vladislav II. (1471–1516) [→ Ungarn]  
Ludwig I. (1516–1526) [→ Ungarn]

## Bulgarien

Zartum 918, Eroberung durch Byzanz 1014, Neugründung 1185/86, Eroberung durch die Osmanen 1393/96. Die Daten sind je nach Literatur höchst unterschiedlich. Die folgende Liste folgt Feldkamp 2002, S. 27–29.

Asparuch (681–702)  
Tervel (702–718)  
Unbekannter Herrscher (718–725)  
Sevar (725–739)  
Kormisoš (739–756)  
Vinech (756–762)  
Teletz (762–765)  
Sabin (765–767)  
Umar (767)  
Toktu (767–772)  
Pagan (772?)  
Telerig (772–777)  
Kardam (777–803?)  
Krum (803–814)  
Dokum (814)  
Dicevg (814)  
Omurtag (814–831)  
Malomir (831–836)  
Presian (836–852)  
Boris I. Michael (852–889)  
Vladimir (889–893)  
Symeon I. der Große (893–927, Zar 918)  
Peter (927–969)  
Boris II. (969–971)  
Samuel (976–1014)  
[Gabriel Radomir (1014–1015)]  
[Johannes Vladislav (1015–1018)]  
Asen I. (1186–1196)  
Peter (1196–1197)  
Kalojan (1197–1207)  
Boril (1207–1218)

Ivan Asen II. (1218–1241)  
Koloman Asen (1241–1246)  
Michael Asen (1246–1256)  
Konstantin Tich (1257–1277)  
Lvajlo (1277–1279)  
Ivan Asen III. (1279–1280)  
Georg I. Terter (1280–1292)  
Smiletz (1292–1298)  
Caka (1299)  
Theodor Svetoslav (1300–1322)  
Georg II. Terter (1322–1323)  
Michael Sisman (1323–1330)  
Ivan Stephan (1330–1331)  
Ivan Alexander (1311–1371)  
Ivan Sisman (1371–1393)



## Burgund

Nachfolgereich des Frankenreichs seit 879/888. Vereinigung von Nieder- und Hochburgund 933. Mit dem Heiligen Römischen Reich verbunden seit 1033.

Boso von Vienne (879–887) (Niederburgund)

Ludwig III. der Blind (887–928) (Niederburgund) [→ Italien]

Rudolf I. (888–912) (Hochburgund) [→ Italien]

Rudolf II. (912–937)

Konrad der Friedfertige (937–993)

Rudolf III. der Faule (993–1032)

## Dänemark

Seit Ende des 14. Jahrhunderts Union mit Norwegen und Schweden.

Gnorm der Alte (um 900–950)

Harald I. Blauzahn (um 950–986) [→Norwegen]

Sven I. Gabelbart (986–1014) [→England und Norwegen]

Harald II. Svenson (1014–1018)

Knut I. der Große (1018–1035) [→England und Norwegen]

Knut II. Hardiknut (1035–1042) [→England]

Magnus I. der Gute (1042–1047) [→Norwegen]

Sven II. Estridsen (1047–1076)

Harald III. Hein (1076–1080)

Knut der Heilige (1080–1086)

Olaf I. Hunger (1086–1095)

Erich I. der Gute (1095–1103)

Niels der Alte (1104–1134)

Erich II. Emune (1134–1137)

Erich III. Lam (1137–1147)

Sven III. Grate (1147–1157)

Knut (1154–1157)

Waldemar I. der Große (1157–1182)

Knut VI. (1182–1202)

Waldemar II. der Sieger (1202–1241)

Erich IV. Pflugpfennig (1241–1250)

Abel (1250–1252)

Christoph I. (1252–1259)

Erich V. Klipping (1259–1286)

Erich VI. Menved (1286–1319)

Christoph II. (1320–1332)

Waldemar III. (Gegenkönig 1326–1330)

[Interregnum 1332–1340]

Waldemar IV. Atterdag (1340–1375)

Olaf (IV.) (1376–1387)

Margarete I. (1387–1412)

Erich VII. von Pommern (1412–1439)

Christoph III. (1440–1448)

Christian I. von Oldenburg (1448–1481)

Johann I. (Hans) von Oldenburg (1482/83–1513)

## England

Ab dem 5. Jahrhundert: Heptarchie der angelsächsischen Königreiche: Essex, Sussex, Wessex, Kent, East Anglia, Mercia, Northumbrien. Im 9. Jahrhundert unter der Vorherrschaft von Wessex zum Königreich England vereint.

Egbert (802–839)  
Etehlwulf (839–858)  
Ethelbald (855–860)  
Ethelbert (860–866)  
Ethelred (865/66–871)  
Alfred der Große (871–899)  
Edward der Ältere (899–924)  
Athelstan (924–939)  
Edmund (939–946)  
Edred (946–955)  
Edwy (955–959)  
Edgar (957–975)  
Edward der Märtyrer (975–978/79)  
Ethelred (968/969 und 1014–1016)  
Sven Gabelbart (1013–1014) [→ Dänemark und Norwegen]  
Edmund Eisenseite (1016)  
Knut der Große (1016–1035) [→ Dänemark und Norwegen]  
Hardiknut (1035–1037 und 1040–1042) [→ Dänemark]  
Harald Hasenfuß (1037–1040)  
Edward der Bekenner (1042–1066)  
Harald (1066)  
Wilhelm I. der Eroberer (1066–1087)  
Wilhelm II. Rufus (1087–1100)  
Heinrich I. (1100–1135)  
Mathilde (1141–1148)  
Stephan (1135–1154)  
Heinrich II. (1154–1189)  
Richard I. Löwenherz (1189–1199)  
Johann Ohneland (1199–1216)

Heinrich III. (1216–1272)  
Edward I. (1272–1307)  
Edward II. (1307–1327)  
Edward III. (1327–1377)  
Richard II. (1386–1399)  
Heinrich IV. (1399–1413)  
Heinrich V. (1413–1422)  
Heinrich VI. (1422–1437 und 1470–1471)  
Edward IV. (1461–1470 und 1471–1483)  
Edward V. (1483)  
Richard III. (1483–1485)  
Heinrich VII. (1485–1509)

## Frankenreich

Königreich seit dem 5. Jahrhundert, später mehrfach geteilt. Unter Karl dem Großen Erwerb der Kaiserwürde (800). Teilung 843. Aus Westfranken, Lotharingen und Ostfranken gingen die Königreiche Frankreich, Burgund, Italien und das Heilige Römische Reich hervor.

### *Merowinger*

Merowech (448–457)  
 Childerich I. (457–481)  
 Chlodwig I. (481–511)  
 Theuderich I. (Residenz Reims 511–533)  
 Theudebert I. (Residenz Reims 533–548)  
 Theudebald (Residenz Reims 548–555)  
 Chlodomer (Residenz Orléans 511–524)  
 Childebert I. von Paris (511–558)  
 Chlothar I. (Residenz Soissons 511–558, Gesamt 558–561)  
 Sigibert I. von Austrasien (561–575)  
 Childebert II. von Austrasien (575–595/96)  
 Theudebert II. von Austrasien (596–612)  
 Theuderich II. von Austrasien (595/96–613)  
 Sigibert II. von Austrasien (613)  
 Guntram von Burgund (561–592)  
 Charibert I. von Paris (561–567)  
 Chilperich I. von Neustrien (561–584)  
 Chlothar II. von Neustrien (584–613), Gesamt (613–629)  
 Dagobert I. (629–639)  
 Charibert II. von Aquitanien (630–632)  
 Sigibert III. von Austrasien (634–656)  
 Dagobert II. von Austrasien (656–660 und 676–679)  
 Childebert (III.) von Austrasien (660–662)  
 Childerich II. von Austrasien (662–673), Gesamt (673–675)  
 Chlodwig II. von Neustrien (639–657)

Chlothar III. von Neustrien (657–673)  
 Theuderich III. von Neustrien (673–691)  
 Chlodwig III. (690–694)  
 Childebert III. (694–711)  
 Dagobert III. (711–715)  
 Chilperich II. (715–721)  
 Chlothar IV. (717–719)  
 Theuderich IV. (721–737)  
 Childerich III. (743–751)

### *Karolinger*

Pippin III. der Jüngere (751–768)  
 Karlmann (768–771)  
 Karl der Große (768–814, Kaiser 800)  
 Ludwig der Fromme (814–840, Kaiser 813)

### *Lotharingen*

Lothar I. (843–855, Kaiser 817)  
 Lothar II. (855–869, Lotharingen)  
 Ludwig II. (855–875, Italien; Kaiser 850)  
 Karl von der Provence (855–863, Burgund)

### *Westfranken*

Karl (II.) der Kahle (843–877, 875–877 Italien, Kaiser 875)  
 Ludwig II. der Stammler (877–879)  
 Ludwig III. (879–882)  
 Karlmann (882–884)  
 Karl (III.) der Dicke (885–888, Kaiser 881)  
 Odo von Paris (888–898) [*Kapetinger*]  
 Karl (III.) der Einfältige (893/898–923)  
 Robert I. (922–923) [*Kapetinger*]  
 Rudolf (923–936) [*Burgunder*]  
 Ludwig IV. (936–954)  
 Lothar (954–986)  
 Ludwig V. (986–987)

### *Ostfranken*

Ludwig der Deutsche (Bayern 826, Ostfranken 843–876)

Karlmann (Bayern 876–880, Italien 877–879)

Ludwig der Jüngere (Franken/Sachsen 876–882, Bayern 880–882)

Karl der Dicke (Alemannien 876–882, Italien 879–887, Ostfranken 882–887, Westfranken 885–887, Kaiser 881; abgesetzt 887)

Arnulf (Ostfranken 887–899, Kaiser 896)

Ludwig IV. das Kind (Ostfranken 900–911)

## Frankreich

Hugo Capet (987–996)  
Robert II. (996–1031)  
Heinrich I. (1031–1060)  
Philipp I. (1060–1108)  
Ludwig VI. der Dicke (1108–1137)  
Ludwig VII. der Junge (1137–1180)  
Philipp II. Augustus (1180–1223)  
Ludwig VIII. der Löwe (1223–1226)  
Ludwig IX. der Heilige (1226–1270)  
Philipp III. der Kühne (1270–1285)  
Philipp IV. der Schöne (1285–1314)  
Ludwig X. der Zänker (1314–1316)  
Johann I. (1316)  
Philipp V. der Lange (1317–1322)  
Karl IV. der Schöne (1322–1328)  
Philipp VI. (1328–1350)  
Johann II. der Gute (1350–1364)  
Karl V. der Weise (1364–1380)  
Karl VI. der Wahnsinnige (1380–1422)  
Karl VII. der Siegreiche (1422–1461)  
Ludwig XI. (1461–1483)  
Karl VIII. (1483–1498)  
Ludwig XII. von Orléans (1493–1515)

## Germanische Königreiche

### Angelsachen

Die Daten sind aufgrund der Überlieferungssituation mit Vorsicht zu behandeln. Die folgende Zusammenstellung basiert auf [www.britannia.com/history/monarchs/heptarchy.html](http://www.britannia.com/history/monarchs/heptarchy.html).

#### *Essex*

Aescwine (527–587)  
Sledda (587–604)  
Saebert (604–616)  
Saeward (616) [gemeinsam]  
Sexbald (616) [gemeinsam]  
Sexred (616–617)  
Sigeberht I. (617–653)  
Sigeberht II. (653–660)  
Swithhelm (660–665)  
Sighere (665–683) [gemeinsam]  
Sebbi (665–695)  
Swaefred (695– um 715) [gemeinsam]  
Sigeheard (695– um 715) [gemeinsam]  
Offa (709)  
Swaefbert (um 715–738)  
Saelred (738–746)  
Swithred (746–758)  
Sigeric I. (758–798)  
Sigered (798–812)

#### *Kent*

Hengest (um 455–488)  
Aesc (Oeric Oisc) (488–512)  
Octa (512–540)  
Eormenric (540–560)  
Aethelbert I. (560–616)  
Eadbald (um 560–616) [Mitkönig im Gebiet um Rochester]  
Eadbald (616–640)

Aethelwald (um 616–640) [Mitkönig im Gebiet um Rochester]  
Earconbert (640–664)  
Eormenred (um 640–673) [Mitkönig im Gebiet um Rochester]  
Ecgbert I. (664–673)  
Hlothere (673–685)  
Eadric (673–686) [Mitkönig im Gebiet um Rochester]  
Eadric (685–686)  
Mul (686–687)  
Sighere (um 686–688) [Mitkönig im Gebiet um Rochester]  
[Interregnum 687–688]  
Oswine (688–690)  
Swaefheard (688–694) [Mitkönig im Gebiet um Rochester]  
Wihtraed (690–725)  
Aethelbert (694–725) [Mitkönig im Gebiet um Rochester]  
Aethelbert II. (725–762)  
Eadbert I. (725–748) [Mitkönig im Gebiet um Rochester]  
Eadbert II. (748–762) [Mitkönig im Gebiet um Rochester]  
Eardwulf (748–762) [Mitkönig im Gebiet um Rochester]  
Eanmund (762–764)  
Sigered (762–764) [Mitkönig im Gebiet um Rochester]  
Heabert (764–765) [Unterkönig unter der Herrschaft von Mercien]  
Ecgbert II. (765–772) [Unterkönig unter der Herrschaft von Mercien]  
[Unter direkter Herrschaft von Mercien 772–776]  
Ecgbert II. (776–785 und 784–785) [Unterkönig unter der Herrschaft von Mercien]  
Ealhmund (784–785) [Unterkönig unter der Herrschaft von Mercien]

[Unter direkter Herrschaft von Mercien  
785–796]

Eadbert Praen (796–798) [Unter der Herr-  
schaft von Kent]

Cuthred (798–807 [Unterkönig unter der  
Herrschaft von Mercien]

[Unter direkter Herrschaft von Mercien  
807–823]

Baldred (823–824) [Unterkönig unter der  
Herrschaft von Mercien]

Aethelwulf (824–839)

Aethelstan (839–851)

Aethelbert (851–860)

### *Mercien*

Creoda (um 585–593)

Pybba (593–606)

Ceol (606–626)

Penda (626–655)

Peada (655–656) [Unterkönig unter der  
Herrschaft von Northumbrien (bis 658)]

Wulfhere (658–675)

Aethelred I. (675–704)

Coenred (704–709)

Coelred (709–716)

Coelwald (716)

Aethelbald (716–757)

Beornred (757)

Offa (757–796)

Ecgrith (796)

Coenwulf (796–821)

Cenelm (821)

Ceolwulf I. (821–823)

Beornwulf (823–825)

Ludecan, (825–827)

Wiglaf (827–828 und 830–840)

Wigstan (840)

Beorhtwulf (840–852)

Burghred (852–874)

Ceolwulf II. (874–879) [Unterkönig unter  
nordischer Herrschaft]

Aethelred II. (879–884)

### *Northumbrien*

Ida (König von Bernicia 547–559)

Aelle (König von Deira 559–589)

Glappa (König von Bernicia 559–560)

Adda (König von Bernicia 560–568)

Aethelric (König von Bernicia 568–572)

Theodric (König von Bernicia 572–579)

Frithuwald (König von Bernicia 579–585)

Hussa (König von Bernicia 585–593)

Aethelric (König von Deira 589–604)

Aethelfrith (König von Bernicia 593–616,  
König von 604–616)

Edwin (König von Bernicia und Deira 616–  
633)

Eanfrith (König von Bernicia 633–634)

Osric (König von Deira 633–634)

Oswald (König von Bernicia und Deira  
634–642)

Oswiu (König von Bernicia 642–670, König  
von Deira 642–644) [endgültige Vereini-  
gung zum Königreich Northumbrien]

Oswine (König von Deira 644–651) [letzter  
unabhängiger König von Deira]

Aethelwald (Unterkönig von Deira 651–  
656)

Alchfrith (Unterkönig von Deira 656–664)

Aelfwine (Unterkönig von Deira 670–679)  
[Letzter Unterkönig]

Ecgrith (670–685)

Aeldfrith (685–704)

Eadwulf (704–705)

Osred I. (705–716)

Coenred (716–718)

Osric (718–729)

Ceolwulf (729–737)

Eadberht (737–758)



Oswulf (758–759)

Aethelwald Moll (759–765)

Ealchred (765–774)

Aethelred I. (774–779 und 790–796)

Aelfwald I. (779–789)

Osred II. (789–790)

Osbold (796)

Eardwulf (796–806 und 808–810)

Aelfwald II. (806–808)

Eanred (810–841)

Aethelred II. (841–844 und 844–848)

Raedwulf (844)

Osbeorht (848–863)

Aelle II. (863–867)

Ecgbert I. (867–872) [Unterkönig unter nordischer Herrschaft]

Ricsige (872–876) [Unterkönig unter nordischer Herrschaft]

Ecgbert II. (876–878) [Unterkönig unter nordischer Herrschaft]

### *Sussex*

Aella (477–514)

Cissa (514–?)

Aethelwath (?–685)

Berhtun (685–686) [gemeinsam]

Andhun (685–?)

Caedwalla (686–688)

Wattus (?–692)

Nothelm (692– um 714)

Athelstan (um 714– um 720)

Nunna (um 720–725) [Mit Nothelm identisch?]

Athelbert (725– um 750)

Osmund (758–772)

Ealdwulf (765– um 791)

Elfwald (um 772)

Oswald (um 772)

Oslac (um 772)

### *Ostanglien*

Wehha (?)

Wuffa (571–578)

Tyttla (578–593)

Raedwald (593–617)

Eni (617–618)

Eorpwald (618–628)

Ricbert (628–631)

Sigebert (631–634)

Egric (634–635)

Anna (635–654)

Aethelhere (654–655)

Aethelwold (655–664)

Ealdwulf (664–713)

Aelfwald (713–749)

Hun (749–?) [gemeinsam]

Beorna (749– um 758) [gemeinsam]

Alberht (749–?) [gemeinsam]

Aethelred (um 758–779)

Aethelberht (779–794)

Eadwald (796)

Aethelstan (827–839)

Aethelweard (839–855)

Edmund der Märtyrer (855–870)

Oswald (870–876) [Unterkönig unter nordischer Herrschaft]

Aethelred (876–879) [Unterkönig unter nordischer Herrschaft]

Guthrum I. (Aethelstan) (879–890) [Nordischer König]

Eric (890–902) [Nordischer König]

Guthrum II. (902–918) [Nordischer König]

### *Wessex*

Cerdic (519–534)

Cynric (534–560)

Ceawlin (560–591)

Ceol (591–597)

Ceolwulf (597–611)

Cynegils (611–643)

Cenwalh (643–645)  
Cenwalh (648–672)  
Seaxburh (672–674)  
Cenfus (674)  
Aescwine (674–676)  
Centwine (676–685)  
Caedwalla (685–688)  
Ine (688–726)  
Aethelheard (726–740)  
Cuthred (740–756)  
Sigeberht (756–757)  
Cynewulf (757–786)  
Beorhtric (786–802)  
Egbert (802–839) [→ England]

### **Burgunder**

Gundowech (443–um 470) [Lyon]  
Chilperich I. (443–um 480)  
Gundobad (um 480–516) [Lyon]  
Godegisel (um 480–501) [Genf]  
Godomar I. (480–?) [Vienne?]  
Chilperich II. (um 480–?) [Valence?]  
Sigismund (516–523)  
Godomar II. (524–534)

### **Franken**

→ Frankenreich

### **Langobarden**

Alboin (560–572) [Seit 568 in Italien]  
Cleph (572–574)  
[Interregnum (574–584)]  
Authari (584–590)  
Agilulf (590–615)  
Adaloald (615–626)  
Arioald (626–636)  
Rothari (636–652)  
Rodoald (652–653)  
Aripert I. (653–661)

Godepert und Perctarit (661–662)  
Grimoald (662–671)  
Garibald (671)  
Perctarit (2. Mal) (671–688)  
Cunincpert (688–700)  
Liutpert (700–701)  
Raginpert (701)  
Aripert II. (701–712)  
Ansprand (712)  
Liutprand (712–744)  
Hildeprand (744)  
Ratchis (744–749 und 756–757)  
Aistulf (749–756)  
Desiderius (757–774)

### **Ostgoten**

Odoaker (476–493)  
Theoderich der Große (489–526) [→ Westgoten]  
Athalarich (526–534)  
Theodahad (534–536)  
Witiges (536–540)  
Ildibad (540–541)  
Erarich (541)  
Totila (541–552)  
Teja (552)

### **Thüringer**

534 erobert durch das Frankenreich

Bisinus (um 500)  
Baderich (510–529?)  
Berthachar (510–529?)  
Herminafried (510–534)

### **Vandalen**

533/34 von Kaiser Justinian I. erobert.

Godigisel (?–406,)

Gunderich (406–428)

Geiserich (428–477)

Hunerich (477–484)

Gunthamund (484–496)

Thrasamund (496–523)

Hilderich (523–530)

Gelimer (530–534)

Erwig (680–687)

Egica (687–702)

Witiza (702–710)

Roderich (710–711)

Agila II. (711–714)

Ardo (714–720)

## Westgoten

Alarich I. (395–410)

Athaulf (410–415)

Wallia (415–418)

Theoderich I. (418–451)

Thorismund (451–453)

Theoderich II. (453–466)

Eurich (466–484)

Alarich II. (484–507)

Gesalech (507–511)

Theoderich der Große (511–526) [→ Ostgo-  
ten]

Amalrich (526–531)

Theudis (531–548)

Theudigisel (548–549)

Agila I. (549–554)

Athanagild (555–567)

Liuva I. (568–573)

Leovigild (568–586)

Rekkared I. (586–601)

Liuva II. (601–603)

Witterich (603–610)

Gundemar (610–612)

Sisebut (612–621)

Rekkared II. (621)

Suinthila (621–632)

Sisenand (632–636)

Chintila (636–639)

Tulga (639–642)

Chindaswinth (642–652)

Rekkeswinth (649–672)

Wamba (672–680)

## Italien

Selbständig Königreich seit 888. Seit 951/961/1004 Teil des Heiligen Römischen Reichs.

Berengar I. von Friaul (888—924, Kaiser 915)

Wido III. von Spoleto (889–894, Kaiser 891)

Lambert von Spoleto (894–898, Kaiser 892)

Ludwig (III.) der Blinde (900–928, Kaiser 901) [→ Burgund]

Rudolf (II.) (922–926) [→ Burgund]

Hugo (926–947)

Lothar (946–950)

Berengar II. von Ivrea (seit 950, faktisch abgesetzt 951, fortan als Unterkönig bis 961)

Arduin von Ivrea (1002–1004)

## Jerusalem

Gottfried von Bouillon (1099–1100)

Balduin I. (1100–1118)

Balduin II. (1118–1131)

Melisende (1131–1161)

Balduin III. (1143–1162)

Amalrich I. (1162–1174)

Balduin IV. der Aussätzig (1174–1185)

Balduin V. (1183–1186)

Sibylle (1186–1190)

Isabella I. (1192–1205)

Maria (1205–1212)

Isabella II. (1212–1228)

Konrad II. (1228–1254)

Konradin (1254–1268)

Hugo I. (1268–1284)

Johann II. (1284–1285)

Heinrich II. (1285–1291)

## Kastilien

Wiederholt in Personalunion mit León,  
endgültig 1230. Zum Königreich Spanien  
1516.

Ferdinand I. der Große (1035–1065)  
Gracias (König von Galicien 1065–1071)  
Sancho II. der Tapfere (1065–1072)  
Alfons VI. der Tapfere (1072–1109)  
Urraca (1109–1126)  
Alfons VII. Ramo (1126–1157)  
Sancho III. der Ersehnte (1157–1158)  
Alfons VIII. der Edle (1158–1214)  
Heinrich I. (1214–1217)  
Ferdinand III. der Heilige (1217–1252)  
Alfons X. der Weise (1252–1284)  
Sancho IV. der Tapfere (1284–1295)  
Ferdinand IV. der Vertagte (1295–1312)  
Alfons XI. der Rächer (1312–1350)  
Peter I. der Grausame (1350–1369)  
Heinrich II. der Bastard (1369–1379)  
Johann I. (1379–1390)  
Heinrich III. der Kränkliche (1390–1406)  
Johann II. (1406–1454)  
Heinrich IV. der Impotente (1454–1474)  
Isabella I. die Katholische (1474–1504)  
Ferdinand V. (1474–1516) [→ Aragón]  
Johanna I. die Wahnsinnige (1504–1555)  
Philipp I. der Schöne (1506)

## Kleinarmenien

Unabhängiges Königreich von 1080 bis 1375.

Ruben I. (1080–1095)

Konstantin I. (1095–1099/1103)

Thoros I. (1103–1129)

Konstantin II. (1129)

Leon I. (1129–1140)

Stephan I. (1140–1144)

Thoros II. (1144–1169)

Ruben II. (1169–1170)

Mleh (1170–1175)

Ruben III. (1175–1187)

Leon II. (1187–1198)

Leon II. (1198–1219)

Isabella (1219–1252)

Leon III. (1270–1289)

Hethum II. (1289–1293, 1294–1297 und  
1299–1307)

Thoros III. (1293–1298)

Sempad (1297–1299)

Konstantin III. (1299)

Leon IV. (1301–1307)

Oschin (1307–1320)

Leon V. (1320–1341)

Konstantin IV. (1342–1344)

Konstantin V. (1344–1362)

Konstantin VI. (1362–1373)

Peter I. von Lusignan (1361–1369) [→ Zypern]

Leon VI. von Lusignan (1374–1375)

## Kroatien

Ab 1097 in Personalunion mit Ungarn.

Tomislav I. (um 910–928)

Trpimir II. (928–935)

Krešimir I. der Ältere (935–945)

Miroslav I. (945–949)

Mihajlo Krešimir II. (949–969)

Stjepan Držislav (969–997)

Jelena von Zadar (969–975)

Svetoslav Suronja (997–1000)

Krešimir III. (997–1030)

Gojislav (997–1020)

[Unter der Herrschaft des byzantinischen

Kaisers Basileios II. (1019–1025)]

Stjepan I. (1030–1058)

Peter Krešimir IV. (1058–1074)

Dmitar Zvonimir (1075–1089)

Stjepan II. (1089–1090)

Álmos (1091–1093/1095)

Petar Svačić (1093–1097)



## León

Mehrfach Personalunion mit Kastilien,  
1230 endgültig vereinigt.

Garcias I. (910–914)

Frúela II. der Aussätzige (910–925)

Ordoño II. (910–925)

Alfons IV. der Mönch (925–930)

Ramiro II. (930–951)

Ordoño III. (951–956)

Sancho I. der Dicke (956–966)

Ordoño IV. (958–960)

Ramiro III. (966–984)

Bermudo II. der Gichtige (984–999)

Alfons V. (999–1028)

Bermudo III. (1028–1037)

Ferdinand der Große (1037–1065) [→ Kastilien]

Alfons VI. der Tapfere (1065–1109)

Urraca (1109–1126)

Alfons VII. (1126–1157)

Ferdinand II. (1157–1188, König von Galicien 1154)

Alfons IX. (1188–1230)

## **Mallorca**

Jakob II. (1276–1311)

Sancho der Friedliche (1311–1324)

Jakob III. der Kühne (1324–1344)

## Navarra

Sancho I. (905–926)  
Jimeno (925–931)  
García I. (931–970)  
Sancho II. Abarca (970–994)  
García II. (994–1000)  
Sancho III. der Große (1000–1035)  
Garcias III. von Najera (1035–1054)  
Sancho IV. von Penalén (1054–1076)  
Sancho V. Ramirez (1076–1094) [→Aragón]  
Peter I. (1094–1104) [→Aragón]  
Alfons I. der Streitbare (1004–1134) [→Aragón]  
Garcias IV. der Restaurator (1034–1150)  
Sancho VI. der Weise (1050–1194)  
Sancho VII. (1194–1234)  
Theobald I. Postumus (1234–1253)  
Theobald II. (1253–1270)  
Heinrich I. der Fette (1270–1274)  
Johanna I. (1274–1305)  
Philipp I. der Schöne (1284–1305) [→Frankreich]  
Ludwig I. der Zänker (1305–1316) [→Frankreich]  
Philipp II. der Lange (1316–1322) [→Frankreich]  
Karl I. der Schöne (1322–1328)  
Johanna II. (1349)  
Philipp III. (1329–1343)  
Karl II. der Böse (1349–1387)  
Karl III. der Gute (1387–1425)  
Blanka (1425–1441)  
Johann I. (1425–1479) [→Aragón]  
Eleonore (1479)  
Franz Phoebus (1479–1483)  
Katharina (1483–1517)  
Johann III. von Albret (1484–1516) [Ehemann Katharinas]

## Neapel

Bis 1282, 1442–1458 und seit 1503 mit Sizilien vereinigt.

Karl I. von Anjou (1266–1285)

Karl II. der Lahme (1285–1309)

Robert der Weise (1309–1343)

Johanna I. (1343–1381)

Andreas von Ungarn (1344–1345) [1. Gatte  
Johannas I.]

Ludwig von Tarent (1352–1362) [2. Gatte  
Johannas I.]

Karl III. der Kurze von Anjou-Durazzo  
(1381–1386)

Ludwig I. (1382–1384)

Ludwig II. (1386–1400)

Ladislaus von Anjou-Durazzo (1386–1414)

Johanna II. von Anjou-Durazzo (1414–  
1435)

Ludwig III. (1424–1434)

René (1442–1480)

Alfons I. (1442–1458) [→ Aragón]

Ferrante (1458–1494)

Alfons II. (1494–1495)

Ferrandino (1495–1496)

Karl (VIII.) (1495) [→ Frankreich]

Federico (1496–1501)

## Norwegen

Seit Ende des 14. Jahrhunderts Union mit Dänemark und Schweden.

Harald I. Schönhaar (um 860/70–um 933)

Erich I. Blutaxt (930–935)

Hakon I. der Gute (935–960/61)

Harald II. Graufell (960/961–um 974)

[Harald Blauzahn (um 970–um 990)] [→ Dänemark]

Olaf I. Trygvesson (995–1000)

[Sven Gabelbart (1000–1014)] [→ England und Dänemark]

Olaf II. Haraldsson der Heilige (1015–1028)

Knut der Große (1028–1035) [→ England und Dänemark]

Magnus I. der Gute (1035–1047) [→ Dänemark]

Harald III. der Harte (1047–1066)

Olaf III. der Stille (1066–1093)

Magnus II. (1066–1069)

Magnus III. Barfuß (1093–1103)

Eystein I. (1003–1122/23)

Sigurd I. Jerusalemfahrer (1003–1130)

Magnus IV. der Blinde (1130–1135)

Harald IV. Gille (1130–1136)

Inge I. Hakenrücken (1136–1161)

Sigurd II. Mund (1136–1155)

Eystein II. (1142–1157)

Eystein III. Meyla (1176–1177)

Hakon II. Breitschulter (1161–1162)

Sigurd III. Markusfostre (1162–1163)

Magnus V. Erlingsson (1163–1184)

Sverre (1184–1202)

Inge (II.) Magnusson (1196–1202)

Hakon III. (1202–1204)

Guttorm (1204–1205)

Inge (III.) Baardsson (1205–1217)

Hakon IV. der Alte (1217–1263)

Hakon der Junge (1240–1257)

Magnus VI. (1263–1280)

Erich (II.) Priesterfeind (1280–1299)

Hakon V. Hochbein (1299–1319)

Magnus VII. Smek (1319–1343)

Hakon VI. (1343–1380)

Olaf IV. (1380–1387)

Magarete (1387–1412)

Erich III. (1412–1441)

Christoph (1442–1448)

Karl I. (1449–1450)

Christian I. (1450–1481)

Johann I. (Hans) von Oldenburg (1483–1513)

## Portugal

Alfons I. Heinrich (1139–1185)

Sancho I. (1185–1211)

Alfons II. der Dicke (1211–1223)

Sancho II. der Mönch (1223–1245)

Alfons III. der Restaurator (1245/48–1279)

Diniz I. der Ackerbauer (1279–1325)

Alfons IV. der Kühne (1325–1357)

Pedro I. der Grausame (1357–1367)

Ferdinand I. der Höfliche (1367–1383)

Johann I. der Unechte (1385–1433)

Eduard I. (1433–1438)

Alfons V. der Afrikaner (1438–1481)

Johann II. der Strenge (1481–1495)

Manuel I. der Glückliche (1495–1521)

## Polen

Einige Herzöge wurden zu Königen erhoben. Seit 1320 Königreich, seit 1386 in Personalunion mit Litauen.

Bolesław I. der Tapfere (1025)

Mieszko (1025–1033)

Bolesław II. der Freigiebige (1076–1079)

Przemysław (1295–1296)

Wenzel I. (1297–1305) [→Böhmen]

Wenzel II. (1305–1306) [→Böhmen]

Władysław I. Ellenlang (1320–1333)

Kasimir I. der Große (1333–1370)

Ludwig I. der Große (1370–1382) [→ Ungarn]

Hedwig (1384–1399) [Personalunion mit Litauen]

Władysław II. Jagiełło (1386–1434)

Władysław III. von Warna (1434–1444) [→ Ungarn]

Kasimir II. Andreas (1447–1492)

Johann I. Albrecht (1492–1501)

## Serbien

Stephan Nemanja (1166–1196)

Stephan der Erstgekrönte (1196–1217)

Stephan Radoslav (1228–1234)

Stephan Vladislav (1234–1243)

Stephan Uroš I. (1243–1276)

Stephan Dragutin (1276–1282)

Stephan Uroš II. Milutin (1282–1321)

Stephan Uroš III. Dečansk (1321–1331)

Stephan Dušan (1331–1355)

Stephan Uroš (1355–1371)

Vukašin (1365–1371)



## Schottland

Kenneth I. (841–859)  
Donald I. (859–862)  
Konstantin I. (862–877)  
Aedh Weißfuß (877–878)  
Eochaid (878–889)  
Giric (878–889)  
Donald II. (889–900)  
Konstantin II. (900–943)  
Malcolm I. (943–954)  
Indulf (954–962)  
Dubh (962–967)  
Culen (967–971)  
Kenneth II. (971–995)  
Konstantin III. (995–997)  
Kenneth III. (997–1005)  
Malcolm II. (1005–1034)  
Duncan I. (1034–1040)  
Macbeth (1040–1057)  
Lulach (1057–1058)  
Malcolm III. (1058–1093)  
Donald III. (1093–1094)  
Duncan II. (1094)  
Donald III. (1094–1097)  
Edgar (1097–1107?)  
Alexander I. (1107?–1124?)  
David I. (1124?–1153)  
Malcolm IV. (1153–1165)  
Wilhelm I. der Löwe (1165–1214)  
Alexander II. (1214–1249)  
Alexander III. (1249–1286)  
Margarete (1286–1290)  
John Balliol (1292–1296)  
Edward Balliol (1333–1356) [Gegenkönig]  
Robert I. Bruce (1306–1329)  
David II. Bruce (1329–1371)  
Robert II. (1371–1390)  
Robert III. (1390–1406)  
Jakob I. (1406–1437)

Jakob II. (1437–1460)

Jakob III. (1460–1488)

Jakob IV. (1488–1513)

## Schweden

Seit Ende des 14. Jahrhunderts Union mit Dänemark und Norwegen.

Erich VIII. der Siegesfrohe (um 970–um 994)

Olaf II. Schoßkönig um (994–um 1021/22)

Anund Jakob um (1021/22–um 1050)

Edmund III. Slemme der Alte (um 1050–um 1056)

Stenkil Ragnwaldsson (um 1060–um 1066)

Inge I. der Ältere (1080–um 1112)

Halsten (um 1070/80)

Blot Sven (um 1080/90)

Philipp (1112–1118)

Inge II. der Jüngere (1118–1130)

Sverker I. (1130–1156)

Erich IX. der Heilige (1150/56–1160)

Karl VII. Sverkersson (1156/60–1167)

Knut I. Eriksson (1167–1196)

Sverker II. (1196–1208)

Erich X. Knutsson (1208–1216)

Johann I. Sverkersson (1216–1222)

Erich XI. Eriksson (1222–1229 und 1234–1250)

Knut II. Lange (1229–1234)

Waldemar Birgersson (1250–1278)

[Birger zu Bjälbo (Regent 1250–1266)]

Magnus I. Scheunenschloß (1278–1290)

Birger Magnusson (1290–1319)

Magnus II. Smek (1319–1374)

Erich XII. (1350–1359)

Hakon Magnusson (1362–1363)

Albrecht (1364–1389)

Magarete (1389–1412)

Erich XIII. (1396–1439)

Christoph (1441–1448)

Karl VIII. Knutsson (1448–1457 und 1464–1465 und 1467–1470)

Christian I. (1457–1464 und 1470–1471)

[Sten Sture der Ältere (Regent 1470–1495 und 1501–1503)]

Johann I. (Hans) von Oldenburg (1497–1501)

## Sizilien

Bis 1282 vereinigt mit Neapel. Ab 1410 in  
Personalunion mit Aragón.

Roger II. (1130–1154)

Wilhelm I. der Böse (1154–1166)

Wilhelm II. der Gute (1166–1189)

Tankred von Lecce (1189–1194)

Wilhelm III. (1194)

Heinrich (VI.) (1194–1197) [→ HRR]

Friedrich (II.) (1197/98–1250) [→ HRR]

Konrad (IV.) (1250–1254) [→ HRR]

Konrad II. (Konradin) (1254–1268)

Manfred (1258–1266)

Karl I. (1266–1282) [→ Neapel]

Peter I. der Große (1282–1285)

Jakob I. der Gerechte (1285–1296)

Friedrich II. (1296–1337)

Peter II. (1321–1342)

Ludwig (1342–1355)

Friedrich III. (1356–1377)

Maria (1377–1402)

Martin I. der Jüngere (1391–1409)

Martin II. der Ältere (1409–1410) [→ Ara-  
gón]

## Thessaloniki

Begründet 1204 nach der lateinischen Eroberung des byzantinischen Kaiserreichs, erobert durch den Despoten von Epirus 1224. In der Folgezeit nur noch Titularkönigreich.

Bonifatius (1204–1207)

Demetrius (1207–1224)

## Ungarn

Stephan I. der Heilige (997–1038)  
Peter I. (1038–1041 und 1044–1046)  
Aba Samuel (1041–1044)  
Andreas I. der Katholische (1046–1060)  
Bela I. (1060–1063)  
Salomon (1063–1074)  
Geisa I. Magnus (1074–1077)  
Ladislaus I. der Heilige (1077–1095)  
Koloman der Bucklige (1095–1116)  
Stephan II. (1116–1131)  
Bela II. der Blinde (1131–1141)  
Geisa II. (1141–1162)  
Stephan III. (1162–1172)  
Ladislaus II. (1162–1163)  
Stephan IV. (1163–1163)  
Bela III. (1172–1196)  
Emmerich (1196–1204)  
Ladislaus III. (1204–1205)  
Andreas II. (1205–1235)  
Bela IV. (1235–1270)  
Stephan V. (1270–1272)  
Ladislaus IV. der Kumane (1272–1290)  
Andreas III. der Venezianer (1290–1301)  
Wenzel von Böhmen (1301–1305) [→ Böhmen]  
Otto von Niederbayern (1305–1308)  
Karl I. Robert (1310–1342)  
Ludwig I. der Große (1342–1382)  
Maria (1382–1395)  
Karl II. von Durazzo (1385–1386)  
Sigismund (1387–1437) [→ HRR, Böhmen]  
Albrecht (1438–1439) [→ HRR, Böhmen]  
Ladislaus V. Postumus (1440–1457)  
Vladislav I. (1440–1444)  
Matthias I. Corvinus (1458–1490) [→ Böhmen]  
Vladislav II. (1490–1516) [→ Böhmen]  
Ludwig II. (1516–1526) [→ Böhmen]

## Zypern

Verkauft an Venedig 1489.

Amalrich (1197–1205)  
Hugo I. (1205–1218)  
Heinrich I. (1218–1253)  
Hugo II. (1253–1267)  
Hugo III. (1267–1284)  
Johann I. (1284–1285)  
Heinrich II. (1285–1324)  
Hugo IV. (1324–1359)  
Peter I. (1359–1369)  
Peter II. (1369–1382)  
Jakob I. (1382–1398)  
Janus (1398–1432)  
Johann II. (1432–1458)  
Charlotte (1458–1460)  
Jakob II. (1460–1473)  
Jakob III. (1473–1474)  
Caterina Cornaro (1474–1489)
