# Supplementary material
Source: publisher site journal article supplement (https://www.degruyterbrill.com/publication/isbn/9783110442656/downloadAsset/9783110442656_Buettner%20Koenigsherrschaft.zip)
Supplement: Supplementary file 18 [file mark_splm_9783110442649_Buttner Konigsherrschaft Zusatz D Korrekturen und Erganzungen.pdf › mark_splm_9783110442649_Buttner Konigsherrschaft Zusatz D Korrekturen und Erganzungen.pdf]

## D Korrekturen und Ergänzungen

Seit Erscheinen des Buches sind folgende Versehen und Ergänzungen bekannt geworden.

### Bibliographie

- S. 229, bei Ewig 1956: „S. 7–73“ = „S. 7–73.“
- S. 237, bei Moraw 1992: Streichen „Peter Moraw:“
- S. 241, bei Schulze, W./Oexle 1999: „Deutsche Historiker im Nationalsozialismus, Bd. 14606 (Fischer- Taschenbücher 14606; Die Zeit des Nationalsozialismus)“ = „Deutsche Historiker im Nationalsozialismus (Fischer-Taschenbücher 14606)“
